# Supplementary material for: Integrative analysis of DNA methylation and gene expression reveals distinct hepatocellular carcinoma subtypes with therapeutic implications
Source: publisher site journal article supplement (doi:10.18632/aging.102923), 2020-03-22
Supplement: Supplementary file [file aging-v12i6-102923-supplementary-material-SD1.pdf]

SUPPLEMENTARY FIGURES

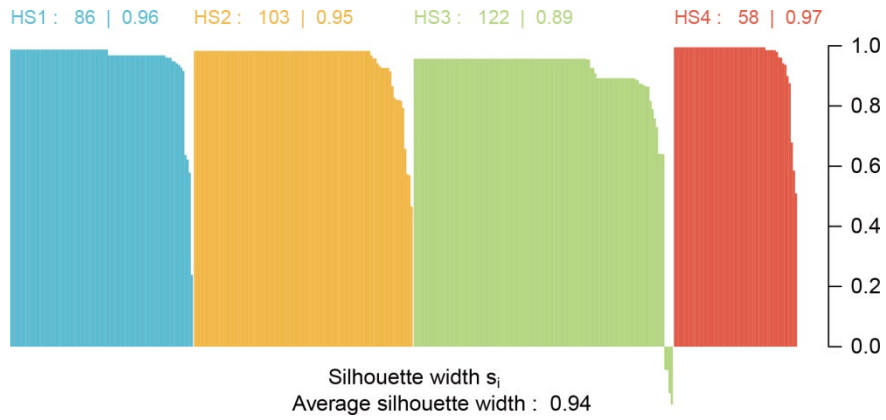

Supplementary Figure 1. Silhouette plot for k = 4 classes.

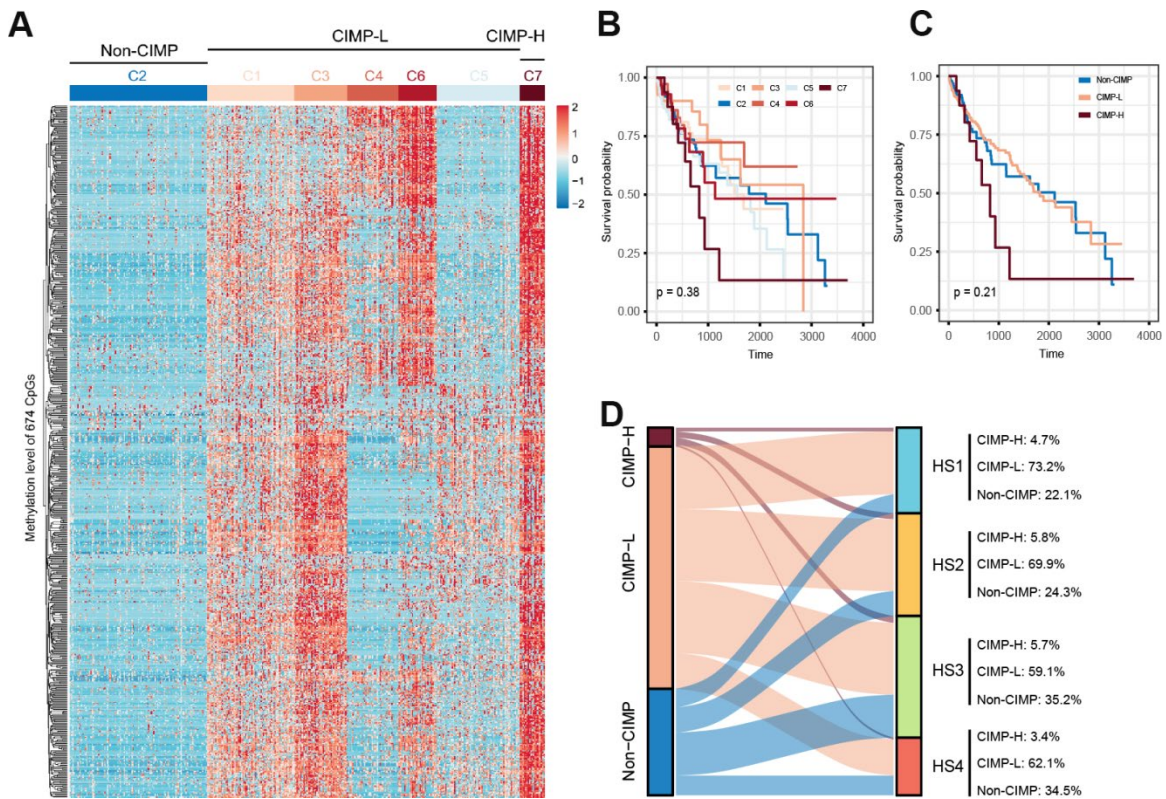

Supplementary Figure 2. Correlation of the HCC subclasses with methylation clusters. (A) 7 methylation clusters were obtained using k-means consensus clustering. These clusters were then divided into 3 groups, namely non-CIMP, CIMP-H and CIMP-L. (B) Kaplan-Meier survival curves of 7 methylation clusters. Statistical significance of differences was determined by Log-rank test. (C) Kaplan-Meier survival curves of 3 methylation groups. (D) Sankey plot shows that HS3 and HS4 are associated with non-CIMP group. Statistical significance of differences was determined by Chi-square test. HCC: hepatocellular carcinoma; CIMP: CpG island methylator phenotype.

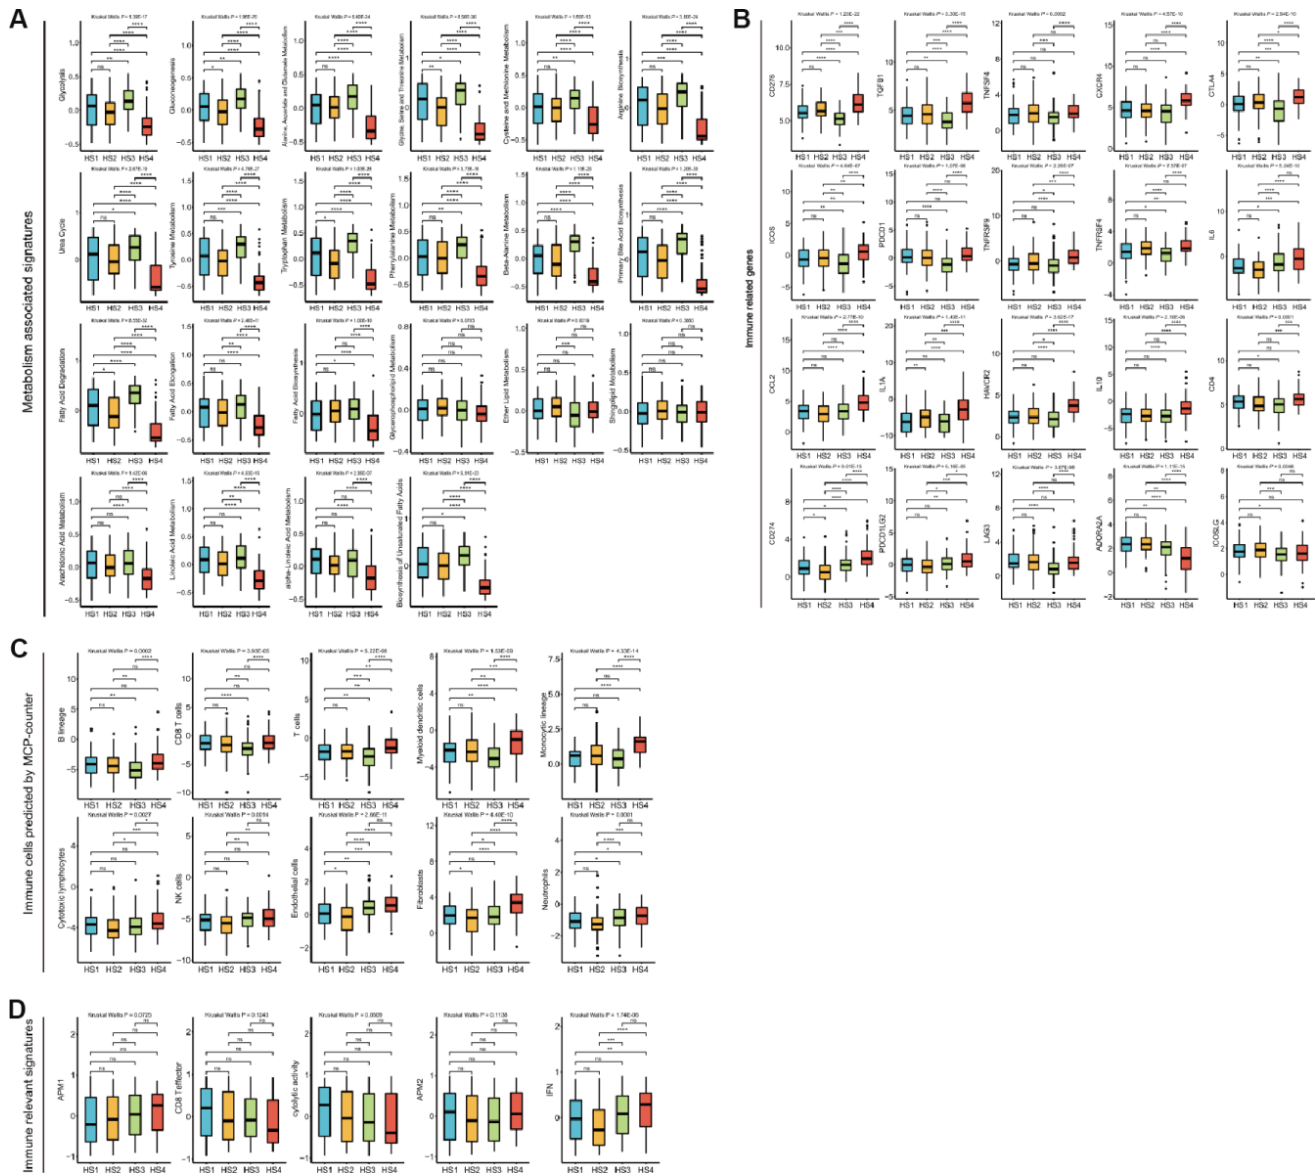

**Supplementary Figure 3. Difference of abundance in metabolism and immune-associated signatures among HCC subclasses.** (A) Box plots (from 25th percentile to the 75th percentile with a line at the median) show the range of abundance in metabolism associated signatures. (B) Box plots show the expression level of immune related genes. (C) Box plots show the abundance of immune and stromal cell populations. (D) Box plots show the abundance of immune-relevant signatures.

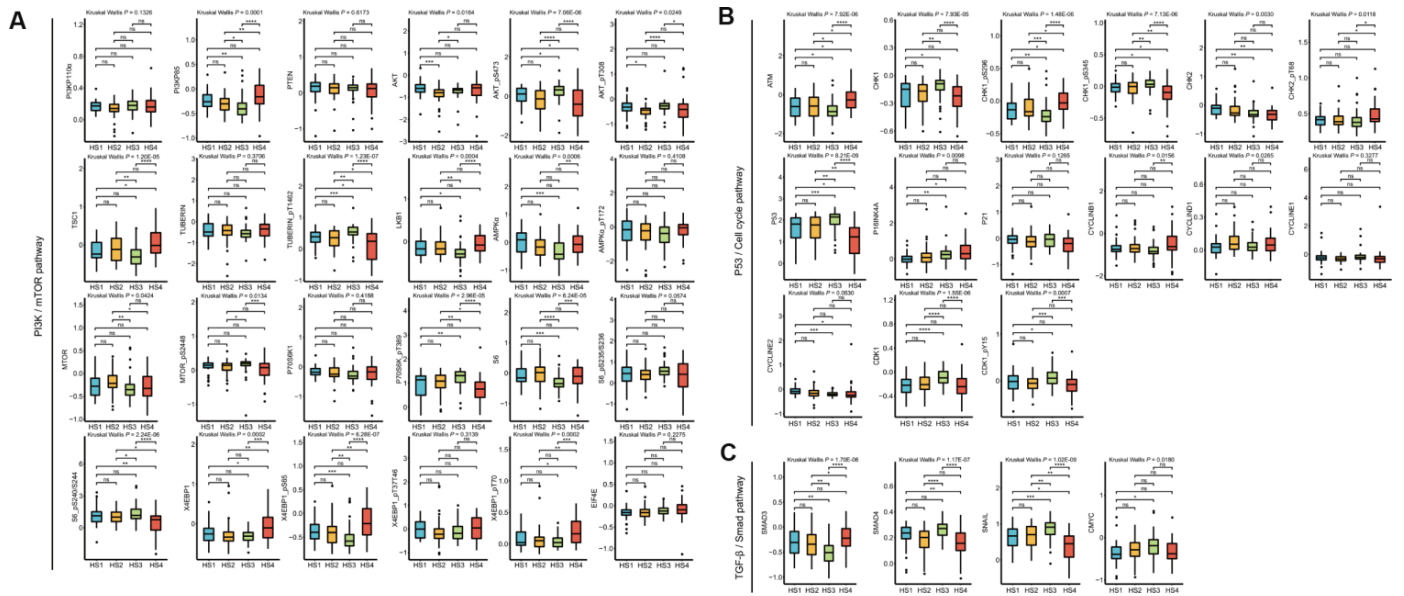

**Supplementary Figure 4. Association between HCC classifications and expression level of proteins in 3 pathways.** (A) Box plots (from 25th percentile to the 75th percentile with a line at the median) show the expression level of proteins in PI3K/mTOR pathway. (B) Box plots show the expression level of proteins in P53/Cell cycle pathway. (C) Box plots show the expression level of proteins in TGF- $\beta$ /Smad pathway. HCC: hepatocellular carcinoma.

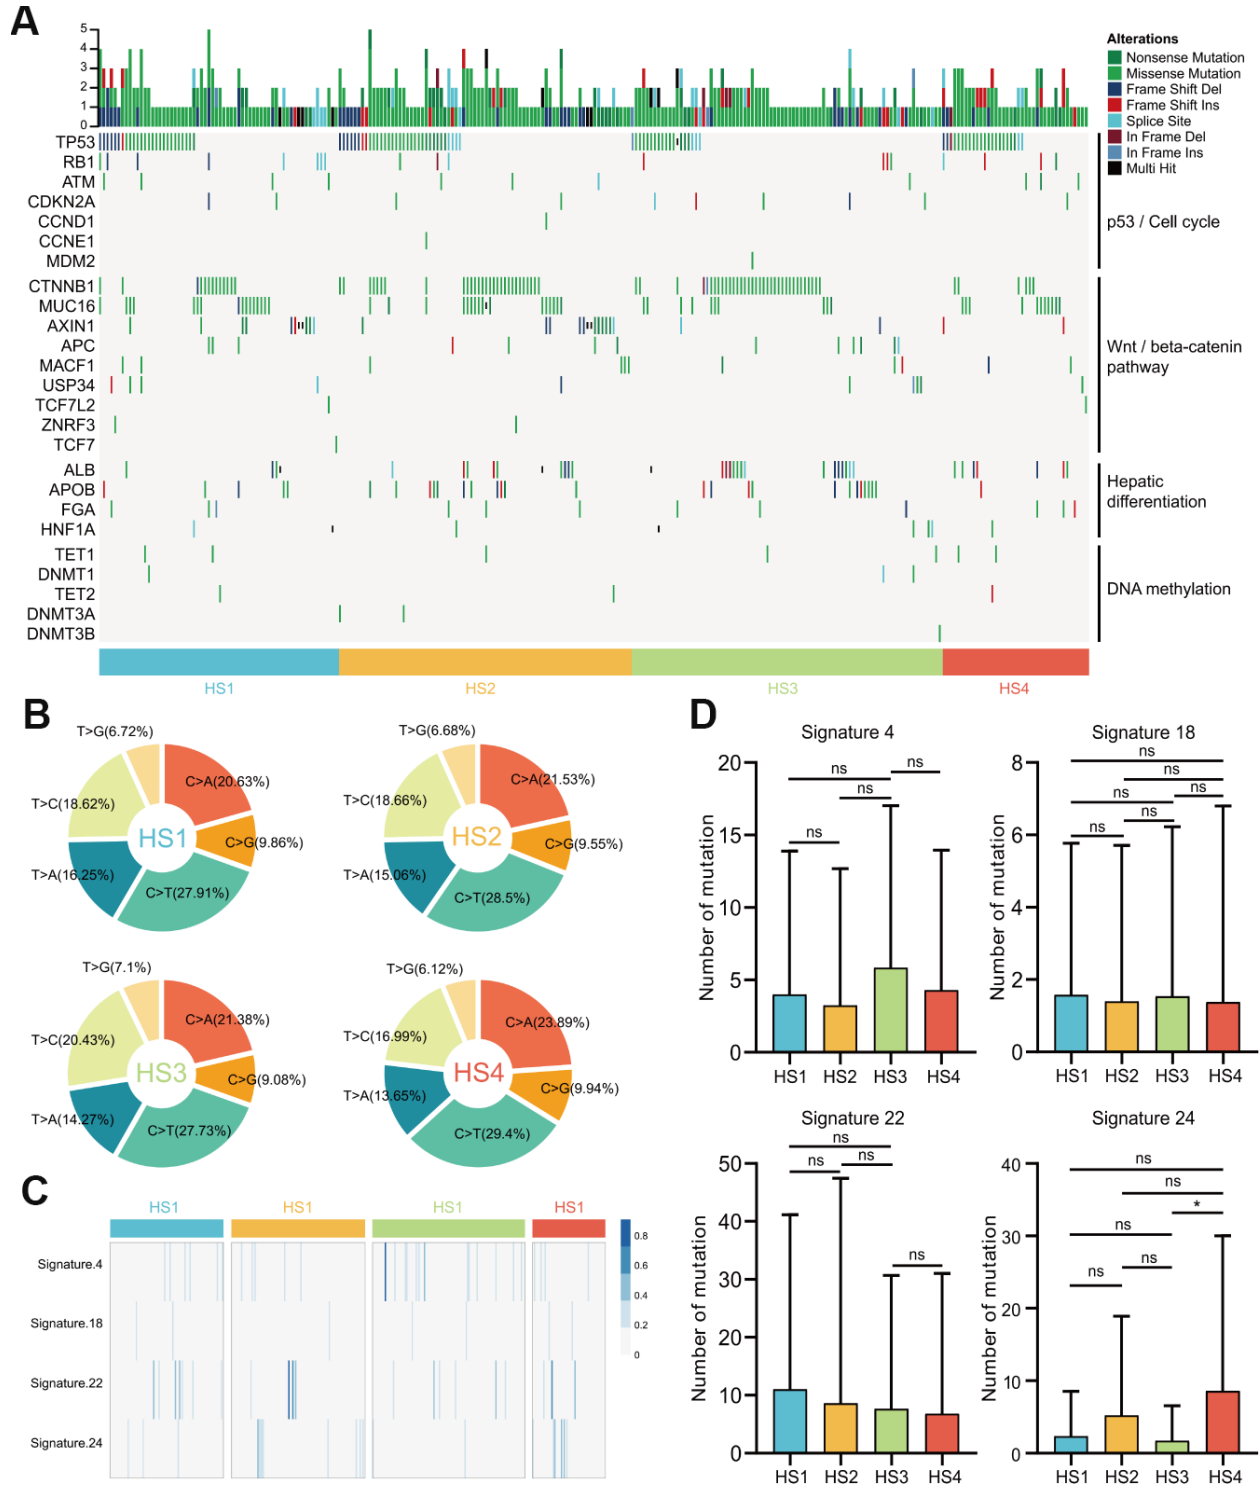

**Supplementary Figure 5. Association between HCC classifications and somatic mutation alterations.** (A) OncoPrint showing mutation status of genes in P53/Cell cycle pathway, Wnt/beta-catenin pathway, hepatic differentiation and DNA methylation (see detailed statistical analysis in Supplementary Table 3). (B) Proportion of 6 different single-nucleotide substitutions in HCC classifications are shown. (C) Heatmap shows signature weight of 4 prognosis-associated signatures among 4 subclasses. (D) Histograms show the difference of mutation number in 4 signatures among HCC subclasses. HCC: hepatocellular carcinoma

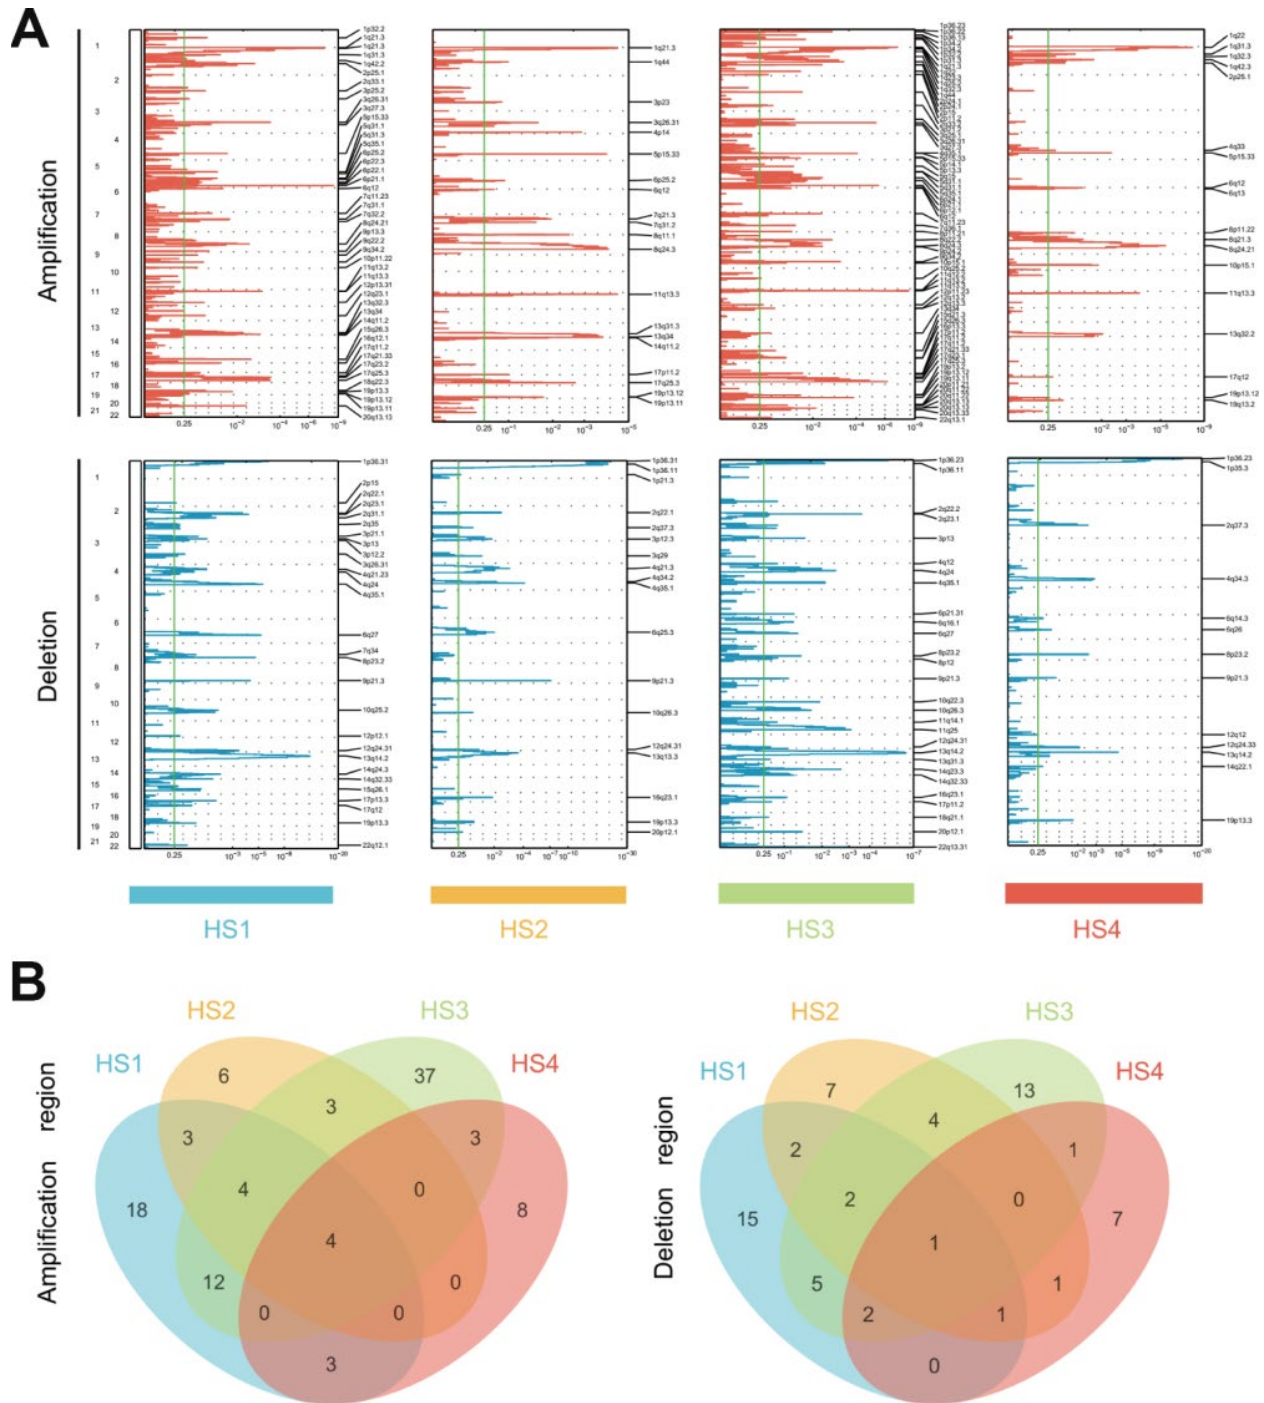

**Supplementary Figure 6. Association between HCC classifications and DNA copy number alterations. (A)** Genome-wide focal amplification (red) and deletion (blue) peaks in 4 HCC subclasses identified by GISTIC2.0. **(B)** Venn diagrams identify the specific/common significant amplification and deletion regions in different HCC subclasses. HCC: hepatocellular carcinoma.
