# Supplementary material for: Integrative analysis of DNA methylation and gene expression reveals distinct hepatocellular carcinoma subtypes with therapeutic implications
Source: publisher site journal article supplement (doi:10.18632/aging.102923), 2020-03-22
Supplement: Supplementary file [file aging-v12i6-102923-supplementary-material-SD2.pdf]

## SUPPLEMENTARY TABLES

Please browse Full Text version to see the data of Supplementary Table 1.

### Supplementary Table 1. Results of MethylMix analysis.

### Supplementary Table 2. Detailed results from statistical analysis of overall survival and recurrence free survival.

| Results of survival analysis (OS) of distinct HCC classification |                      |           |                  |                  |                  |
|------------------------------------------------------------------|----------------------|-----------|------------------|------------------|------------------|
|                                                                  | Median survival time | 95%CI     | p value (vs HS2) | p value (vs HS3) | p value (vs HS4) |
| HS1                                                              | 2839                 | 1749-3929 | 0.0609           | 0.5308           | 0.0034           |
| HS2                                                              | 1622                 | 929-2315  | /                | 0.0786           | 0.1821           |
| HS3                                                              | 1818                 | 1213-2423 | /                | /                | 0.0048           |
| HS4                                                              | 1135                 | 450-1820  | /                | /                | /                |

  

| Results of survival analysis (RFS) of distinct HCC classification |                      |          |                  |                  |                  |
|-------------------------------------------------------------------|----------------------|----------|------------------|------------------|------------------|
|                                                                   | Median survival time | 95%CI    | p value (vs HS2) | p value (vs HS3) | p value (vs HS4) |
| HS1                                                               | 1453                 | 806-2100 | 0.0723           | 0.6013           | 0.0911           |
| HS2                                                               | 828                  | 396-1260 | /                | 0.1228           | 0.907            |
| HS3                                                               | 893                  | 587-1199 | /                | /                | 0.1196           |
| HS4                                                               | 489                  | 198-780  | /                | /                | /                |

Please browse Full Text version to see the data of Supplementary Table 3.

### Supplementary Table 3. List of 401 methylation driven genes.

**Supplementary Table 4. Clinical Characteristics of TCGA-LIHC cohort.**

| <b>Clinical Characteristics of TCGA cohort</b> |                             |
|------------------------------------------------|-----------------------------|
| <b>Variable</b>                                | <b>TCGA set<br/>(n=369)</b> |
| Age                                            |                             |
| >55                                            | 241                         |
| <=55                                           | 122                         |
| Gender                                         |                             |
| female                                         | 118                         |
| male                                           | 245                         |
| Viral infection                                |                             |
| HBV                                            | 95                          |
| HCV                                            | 49                          |
| HBV and HCV                                    | 7                           |
| No infection                                   | 102                         |
| Child-Pugh score                               |                             |
| A                                              | 216                         |
| B/C                                            | 22                          |
| Histologic grade                               |                             |
| G1                                             | 55                          |
| G2                                             | 175                         |
| G3                                             | 116                         |
| G4                                             | 12                          |
| TNM stage                                      |                             |
| I/II                                           | 254                         |
| III/IV                                         | 85                          |
| AFP level                                      |                             |
| Low                                            | 181                         |
| High                                           | 95                          |
| Vascular invasion                              |                             |
| None                                           | 205                         |
| Micro                                          | 90                          |
| Macro                                          | 14                          |
| Family history                                 |                             |
| No                                             | 204                         |
| Yes                                            | 110                         |

**Supplementary Table 5. Detailed results from statistical analysis of mutation characteristics in HCC classifications. HCC: hepatocellular carcinoma.**

| <b>Mutation characteristics in distinct HCC classification</b> |            |                       |                |            |                       |                |            |                       |                |            |                       |                |
|----------------------------------------------------------------|------------|-----------------------|----------------|------------|-----------------------|----------------|------------|-----------------------|----------------|------------|-----------------------|----------------|
|                                                                | <b>HS1</b> | <b>percentage (%)</b> | <b>p-value</b> | <b>HS2</b> | <b>percentage (%)</b> | <b>p-value</b> | <b>HS3</b> | <b>percentage (%)</b> | <b>p-value</b> | <b>HS4</b> | <b>percentage (%)</b> | <b>p-value</b> |
| Number of patients                                             | 84         | 100.00                |                | 99         | 100.00                |                | 112        | 100.00                |                | 54         | 100.00                |                |
| TP53                                                           | 26         | 30.95                 | ns             | 33         | 33.33                 | ns             | 19         | 16.96                 | 0.0009         | 22         | 40.74                 | ns             |
| CTNNB1                                                         | 13         | 15.48                 | 0.0402         | 29         | 29.29                 | ns             | 35         | 31.25                 | 0.0243         | 6          | 11.11                 | 0.0174         |
| MUC16                                                          | 16         | 19.05                 | ns             | 17         | 17.17                 | ns             | 10         | 8.93                  | 0.0201         | 11         | 20.37                 | ns             |
| ALB                                                            | 4          | 4.76                  | ns             | 10         | 10.10                 | ns             | 15         | 13.39                 | ns             | 7          | 12.96                 | ns             |
| APOB                                                           | 5          | 5.95                  | ns             | 11         | 11.11                 | ns             | 12         | 10.71                 | ns             | 1          | 1.85                  | ns             |
| AXIN1                                                          | 11         | 13.10                 | 0.0495         | 13         | 13.13                 | 0.0271         | 2          | 1.79                  | 0.0032         | 2          | 3.70                  | ns             |
| RB1                                                            | 8          | 9.52                  | ns             | 3          | 3.03                  | ns             | 4          | 3.57                  | ns             | 4          | 7.41                  | ns             |
| APC                                                            | 3          | 3.57                  | ns             | 4          | 4.04                  | ns             | 6          | 5.36                  | ns             | 0          | 0.00                  | ns             |
| MACF1                                                          | 2          | 2.38                  | ns             | 4          | 4.04                  | ns             | 3          | 2.68                  | ns             | 2          | 3.70                  | ns             |
| FGA                                                            | 3          | 3.57                  | ns             | 3          | 3.03                  | ns             | 3          | 2.68                  | ns             | 3          | 5.56                  | ns             |
| ATM                                                            | 4          | 4.76                  | ns             | 3          | 3.03                  | ns             | 1          | 0.89                  | ns             | 3          | 5.56                  | ns             |
| USP34                                                          | 4          | 4.76                  | ns             | 1          | 1.01                  | ns             | 4          | 3.57                  | ns             | 1          | 1.85                  | ns             |
| CDKN2A                                                         | 2          | 2.38                  | ns             | 2          | 2.02                  | ns             | 5          | 4.46                  | ns             | 1          | 1.85                  | ns             |
| HNF1A                                                          | 2          | 2.38                  | ns             | 1          | 1.01                  | ns             | 4          | 3.57                  | ns             | 1          | 1.85                  | ns             |
| TET1                                                           | 2          | 2.38                  | ns             | 1          | 1.01                  | ns             | 2          | 1.79                  | ns             | 2          | 3.70                  | ns             |
| DNMT1                                                          | 1          | 1.19                  | ns             | 0          | 0.00                  | ns             | 2          | 1.79                  | ns             | 0          | 0.00                  | ns             |
| DNMT3A                                                         | 0          | 0.00                  | ns             | 2          | 2.02                  | ns             | 0          | 0.00                  | ns             | 0          | 0.00                  | ns             |
| TET2                                                           | 1          | 1.19                  | ns             | 1          | 1.01                  | ns             | 0          | 0.00                  | ns             | 1          | 1.85                  | ns             |
| TCF7                                                           | 1          | 1.19                  | ns             | 0          | 0.00                  | ns             | 0          | 0.00                  | ns             | 0          | 0.00                  | ns             |
| TCF7L2                                                         | 1          | 1.19                  | ns             | 0          | 0.00                  | ns             | 0          | 0.00                  | ns             | 1          | 1.85                  | ns             |
| ZNRF3                                                          | 1          | 1.19                  | ns             | 1          | 1.01                  | ns             | 0          | 0.00                  | ns             | 0          | 0.00                  | ns             |
| CCND1                                                          | 0          | 0.00                  | ns             | 1          | 1.01                  | ns             | 0          | 0.00                  | ns             | 0          | 0.00                  | ns             |
| CCNE1                                                          | 0          | 0.00                  | ns             | 1          | 1.01                  | ns             | 0          | 0.00                  | ns             | 0          | 0.00                  | ns             |
| DNMT3B                                                         | 0          | 0.00                  | ns             | 0          | 0.00                  | ns             | 1          | 0.89                  | ns             | 0          | 0.00                  | ns             |
| MDM2                                                           | 0          | 0.00                  | ns             | 0          | 0.00                  | ns             | 1          | 0.89                  | ns             | 0          | 0.00                  | ns             |

**Supplementary Table 6. Results from cox regression of mutation signature.**

| <b>The results of cox regression of mutation signature</b> |             |                |
|------------------------------------------------------------|-------------|----------------|
|                                                            | <b>HR</b>   | <b>p value</b> |
| Signature.1                                                | 1.011480944 | 0.638463658    |
| Signature.2                                                | 1.002796051 | 0.947780338    |
| Signature.3                                                | 1.000279303 | 0.959690395    |
| Signature.4                                                | 1.012134008 | 0.13054495     |
| Signature.5                                                | 0.993570767 | 0.225181567    |
| Signature.6                                                | 0.959881321 | 0.373625593    |
| Signature.7                                                | 0.973549374 | 0.514468948    |
| Signature.8                                                | 1.002630783 | 0.734655486    |
| Signature.9                                                | 0.986273393 | 0.25153733     |
| Signature.10                                               | 0.943404048 | 0.409932352    |
| Signature.11                                               | 0.975163806 | 0.524308952    |
| Signature.12                                               | 0.986674705 | 0.277786476    |
| Signature.13                                               | 1.016710568 | 0.649605185    |
| Signature.14                                               | 1.034850808 | 0.471043598    |
| Signature.15                                               | 1.040357259 | 0.190478444    |
| Signature.16                                               | 1.000884331 | 0.616969517    |
| Signature.17                                               | 1.052131131 | 0.228968673    |
| Signature.18                                               | 1.030359459 | 0.096865864    |
| Signature.19                                               | 0.99322056  | 0.764671586    |
| Signature.20                                               | 1.03315935  | 0.279846514    |
| Signature.21                                               | 1.010874489 | 0.555240576    |
| Signature.22                                               | 1.005884371 | 0.020551777    |
| Signature.23                                               | 0.986966228 | 0.754838115    |
| Signature.24                                               | 1.019837628 | 0.0000821      |
| Signature.25                                               | 0.992860584 | 0.616339237    |
| Signature.26                                               | 1.002719008 | 0.810417508    |
| Signature.27                                               | 1.01248891  | 0.669391861    |
| Signature.28                                               | 0.985549785 | 0.443335344    |
| Signature.29                                               | 1.004175822 | 0.825991515    |
| Signature.30                                               | 1.019595427 | 0.177302858    |

Please browse Full Text version to see the data of Supplementary Tables 7, 8

**Supplementary Table 7. Detailed information of specific amplification and deletion regions in HCC classifications.  
HCC: hepatocellular carcinoma.**

**Supplementary Table 8. Information of 2835 genes for machine learning.**
