# Supplementary material for: Integrative analysis of DNA methylation and gene expression reveals distinct hepatocellular carcinoma subtypes with therapeutic implications
Source: Aging (Albany NY). 2020 Mar 22;12(6):4970–95. doi: 10.18632/aging.102923 (PMC7138576; doi:10.18632/aging.102923)
Supplement: Supplementary Table 1 [file aging-12-102923-s003..xlsx]

## Sheet: Table S1
Results of MethylMix analysis
gene	normalMean	TumorMean	logFC	pValue	adjustP	cor	corPavlue
RAB31	0.209682	0.340607	0.699907	2.89795e-14	2.08073e-11	-0.316284	5.12333e-10
FGL2	0.278442	0.536092	0.945103	1.20464e-09	8.6493e-07	-0.3166	4.91437e-10
ZNF229	0.252316	0.215879	-0.225006	2.78441e-08	1.99921e-05	-0.317235	4.51828e-10
FKBP11	0.14927	0.116868	-0.353047	1.08323e-17	7.7776e-15	-0.317503	4.36027e-10
RDM1	0.272947	0.257789	-0.0824298	4.1138e-05	0.0295371	-0.317505	4.35948e-10
RIC3	0.0677668	0.148945	1.13613	5.45931e-05	0.0391979	-0.317876	4.15016e-10
NPTX2	0.167069	0.386246	1.20907	1.89189e-16	1.35838e-13	-0.318057	4.05125e-10
OSBPL9	0.1777	0.15208	-0.224617	2.33995e-13	1.68008e-10	-0.318723	3.70783e-10
ADRA1A	0.134357	0.243132	0.855664	5.61098e-11	4.02868e-08	-0.31931	3.4288e-10
XKR6	0.0903767	0.221786	1.29514	1.12335e-16	8.06562e-14	-0.319508	3.33956e-10
AZGP1	0.614295	0.439494	-0.483087	2.57037e-15	1.84552e-12	-0.319721	3.24558e-10
POU4F1	0.0969453	0.349006	1.84801	3.16578e-18	2.27303e-15	-0.320216	3.03767e-10
ASPG	0.12744	0.184921	0.537094	7.62565e-07	0.000547522	-0.321348	2.60936e-10
PPP1R3C	0.0833759	0.0727824	-0.19604	3.09236e-11	2.22032e-08	-0.323824	1.86763e-10
CREB3L3	0.109913	0.093784	-0.228945	2.05044e-09	1.47221e-06	-0.323884	1.8524e-10
KLHL30	0.781473	0.719957	-0.118286	2.10449e-07	0.000151102	-0.324713	1.65498e-10
RIN1	0.390173	0.28772	-0.439446	6.64988e-10	4.77461e-07	-0.325823	1.42248e-10
LRRC61	0.235124	0.20907	-0.169438	4.04845e-07	0.000290679	-0.326155	1.3594e-10
PTPRN2	0.429002	0.583365	0.443413	5.01232e-18	3.59885e-15	-0.327033	1.2052e-10
BCL10	0.462336	0.413676	-0.160442	4.58495e-10	3.292e-07	-0.327472	1.13453e-10
ZNF620	0.141253	0.119731	-0.238486	2.18355e-06	0.00156779	-0.327555	1.12178e-10
KCNH8	0.0708714	0.171247	1.2728	3.93888e-09	2.82812e-06	-0.328836	9.4011e-11
ANKRD30A	0.871979	0.658504	-0.405102	2.44501e-15	1.75552e-12	-0.329976	8.02824e-11
DOK2	0.652528	0.528754	-0.303445	3.71827e-07	0.000266972	-0.331389	6.59504e-11
ZNF586	0.125182	0.185786	0.569613	1.91856e-08	1.37753e-05	-0.332138	5.9397e-11
CTHRC1	0.191552	0.365002	0.930166	9.77667e-06	0.00701965	-0.333256	5.07783e-11
AKR7A3	0.14245	0.113508	-0.327652	1.36379e-06	0.000979199	-0.333586	4.84772e-11
COX7B2	0.825255	0.526448	-0.648547	1.33895e-18	9.61369e-16	-0.334426	4.30737e-11
UCP2	0.30555	0.447799	0.551444	8.76776e-13	6.29525e-10	-0.336553	3.18716e-11
ZNF483	0.330554	0.474138	0.52042	4.3432e-09	3.11841e-06	-0.337585	2.75149e-11
F2RL2	0.577607	0.632453	0.130869	1.25077e-05	0.00898055	-0.338251	2.50199e-11
AKNA	0.470014	0.603725	0.361186	3.20593e-20	2.30186e-17	-0.338271	2.49459e-11
THOC6	0.791019	0.581311	-0.444403	8.04115e-14	5.77354e-11	-0.338366	2.46091e-11
ZNF334	0.196381	0.284842	0.536503	8.60919e-09	6.1814e-06	-0.338609	2.37678e-11
KIF5C	0.0653815	0.229915	1.81415	1.73524e-11	1.24591e-08	-0.338812	2.30871e-11
SLC26A1	0.426617	0.346572	-0.299788	3.38742e-09	2.43217e-06	-0.338885	2.28469e-11
MNX1	0.0956913	0.187096	0.967317	3.20713e-05	0.0230272	-0.339359	2.13448e-11
MT1A	0.275265	0.252239	-0.12603	9.53023e-08	6.8427e-05	-0.33938	2.12826e-11
TMPRSS12	0.630766	0.678143	0.104484	2.79757e-05	0.0200866	-0.340554	1.79746e-11
A1CF	0.569647	0.473087	-0.267961	2.1186e-07	0.000152115	-0.341665	1.53088e-11
PSMG3	0.309097	0.200533	-0.624219	1.70373e-21	1.22328e-18	-0.342777	1.30281e-11
HAAO	0.0805899	0.0678455	-0.248346	4.30234e-10	3.08908e-07	-0.345338	8.96297e-12
SDK1	0.166816	0.326344	0.968135	1.25228e-09	8.99134e-07	-0.345651	8.56045e-12
TTYH3	0.161618	0.135418	-0.255175	4.56763e-08	3.27956e-05	-0.347029	6.98887e-12
PON3	0.13348	0.114868	-0.216638	9.86254e-08	7.0813e-05	-0.347557	6.4645e-12
NHSL1	0.384062	0.341361	-0.17004	3.32552e-07	0.000238772	-0.348621	5.52252e-12
ZNF595	0.443805	0.344739	-0.364421	2.73934e-13	1.96685e-10	-0.349346	4.9587e-12
UNC93B1	0.413896	0.340625	-0.281082	3.5393e-12	2.54122e-09	-0.350021	4.48398e-12
ZNF582	0.124717	0.17937	0.524282	9.58792e-07	0.000688412	-0.350303	4.29944e-12
CYP3A43	0.443543	0.330601	-0.423985	1.2426e-09	8.92189e-07	-0.350447	4.20784e-12
NETO2	0.0667403	0.235374	1.81833	8.02475e-08	5.76177e-05	-0.351293	3.70758e-12
KLHDC8B	0.140046	0.126952	-0.14162	2.74861e-10	1.9735e-07	-0.351515	3.58643e-12
CR1L	0.300911	0.39484	0.391931	1.7072e-05	0.0122577	-0.35411	2.42627e-12
ELOVL4	0.103569	0.218258	1.07544	5.23338e-06	0.00375757	-0.354265	2.36993e-12
SLC12A8	0.244337	0.198226	-0.301726	5.03397e-11	3.61439e-08	-0.354958	2.13365e-12
SLFN12	0.25399	0.374866	0.561606	1.11572e-06	0.000801086	-0.355135	2.07705e-12
KCNC4	0.0876687	0.203994	1.2184	2.13059e-18	1.52976e-15	-0.355152	2.07167e-12
MT1M	0.234489	0.313206	0.417592	1.95832e-09	1.40608e-06	-0.355192	2.05902e-12
RNF212	0.528852	0.671157	0.343787	5.07178e-19	3.64153e-16	-0.355749	1.89198e-12
ZNF132	0.211493	0.333714	0.658003	5.97515e-22	4.29016e-19	-0.356009	1.81843e-12
POTEC	0.809861	0.639559	-0.340596	9.15227e-11	6.57133e-08	-0.356107	1.79158e-12
GNA14	0.108311	0.200375	0.887527	7.46077e-17	5.35683e-14	-0.356516	1.68318e-12
NR5A2	0.50337	0.356841	-0.496335	2.02253e-10	1.45218e-07	-0.356619	1.65707e-12
HIST1H2BH	0.155324	0.422194	1.44262	2.42451e-17	1.7408e-14	-0.358868	1.17387e-12
C4orf33	0.106971	0.10159	-0.0744605	1.80329e-13	1.29476e-10	-0.358968	1.15607e-12
PSD3	0.234838	0.20321	-0.208696	2.29421e-05	0.0164724	-0.358968	1.15603e-12
NEFM	0.164722	0.319898	0.95758	5.32354e-17	3.8223e-14	-0.359497	1.06553e-12
GRHL2	0.207482	0.44985	1.11646	1.53653e-16	1.10323e-13	-0.359691	1.03407e-12
KCNMB3	0.621595	0.517898	-0.263308	1.29736e-14	9.31505e-12	-0.361145	8.25815e-13
HIST1H3G	0.195768	0.384256	0.972919	3.91537e-17	2.81123e-14	-0.364012	5.28241e-13
ARHGAP10	0.145205	0.257248	0.825067	1.34564e-08	9.66172e-06	-0.364113	5.1993e-13
C1QTNF6	0.52136	0.437415	-0.253276	2.98014e-06	0.00213974	-0.364158	5.16248e-13
LGALS2	0.686868	0.537719	-0.353181	6.3765e-16	4.57833e-13	-0.365366	4.27061e-13
IGF1R	0.0496101	0.127209	1.35849	3.09236e-11	2.22032e-08	-0.365548	4.14968e-13
DBNDD2	0.284866	0.325969	0.194451	2.10456e-06	0.00151107	-0.366044	3.83765e-13
ANKS4B	0.376198	0.284947	-0.400801	2.09151e-08	1.50171e-05	-0.366362	3.64992e-13
NECAB3	0.423733	0.309932	-0.451204	2.71879e-16	1.95209e-13	-0.366473	3.58643e-13
PGLYRP2	0.423545	0.362356	-0.22511	5.67906e-10	4.07757e-07	-0.367633	2.98486e-13
FGF19	0.221781	0.347769	0.648994	1.73836e-12	1.24815e-09	-0.367636	2.98362e-13
ADAM32	0.35054	0.55535	0.663818	5.41664e-15	3.88915e-12	-0.36764	2.98135e-13
FZD8	0.067665	0.1358	1.005	1.72737e-18	1.24025e-15	-0.36836	2.65925e-13
ZNF175	0.0496794	0.0776419	0.644188	1.25112e-08	8.98304e-06	-0.368448	2.62231e-13
MIXL1	0.296484	0.404094	0.446733	2.68693e-08	1.92922e-05	-0.368662	2.5347e-13
CHST4	0.377372	0.597328	0.662534	1.27433e-11	9.14967e-09	-0.368946	2.42241e-13
LY75	0.251593	0.458539	0.865952	5.09829e-14	3.66057e-11	-0.369472	2.22755e-13
HIST1H4J	0.220084	0.199622	-0.140785	9.77315e-15	7.01712e-12	-0.369776	2.12208e-13
MYO18B	0.751928	0.614205	-0.291875	7.10472e-09	5.10119e-06	-0.369842	2.0996e-13
INSL6	0.764534	0.594235	-0.363548	1.20464e-09	8.6493e-07	-0.370665	1.84063e-13
TRIM60	0.852103	0.663807	-0.360263	8.82715e-17	6.33789e-14	-0.371273	1.66954e-13
ENDOD1	0.256028	0.328045	0.357593	1.09483e-06	0.000786087	-0.372188	1.4409e-13
FGG	0.366138	0.280426	-0.384768	1.25112e-08	8.98304e-06	-0.373966	1.081e-13
GSTP1	0.516878	0.567785	0.135521	6.94146e-06	0.00498397	-0.374237	1.03444e-13
ADAD1	0.920347	0.743101	-0.30862	3.36488e-15	2.41598e-12	-0.374715	9.57306e-14
ZNF667	0.198951	0.271833	0.450308	4.65368e-05	0.0334134	-0.375445	8.50031e-14
FAM13A	0.243628	0.401649	0.721255	4.61178e-09	3.31126e-06	-0.37629	7.40551e-14
RBP2	0.804226	0.682918	-0.235888	1.7908e-10	1.2858e-07	-0.376984	6.61022e-14
GPR150	0.202606	0.296637	0.550022	4.52313e-07	0.00032476	-0.376987	6.60692e-14
ADCY5	0.379828	0.486639	0.357507	5.1188e-11	3.6753e-08	-0.380215	3.88163e-14
GLT1D1	0.275071	0.247896	-0.150069	4.27553e-06	0.00306983	-0.381561	3.10426e-14
NOD2	0.374256	0.306766	-0.286886	2.27996e-07	0.000163701	-0.382468	2.66862e-14
S100A2	0.735752	0.596762	-0.302064	6.00081e-19	4.30858e-16	-0.383584	2.21452e-14
DKK3	0.250858	0.415664	0.728545	1.57933e-17	1.13396e-14	-0.384252	1.97958e-14
BRDT	0.82653	0.707284	-0.224778	8.35907e-09	6.00181e-06	-0.384418	1.92517e-14
FABP1	0.472362	0.400203	-0.239163	2.98977e-08	2.14665e-05	-0.384894	1.77708e-14
AKR1B10	0.766877	0.632573	-0.277764	3.65541e-21	2.62458e-18	-0.385884	1.50372e-14
KRT80	0.663043	0.576239	-0.202434	1.02373e-05	0.00735039	-0.385968	1.48269e-14
MYO10	0.0707151	0.213356	1.59317	2.76464e-08	1.98501e-05	-0.386001	1.47437e-14
CLIP3	0.449744	0.551704	0.294789	4.95052e-11	3.55447e-08	-0.386155	1.4366e-14
NAIF1	0.455311	0.396851	-0.198254	2.87633e-07	0.00020652	-0.388077	1.03684e-14
SLC22A10	0.350803	0.270915	-0.372822	1.75608e-07	0.000126086	-0.388406	9.80491e-15
EPHA6	0.0754093	0.178339	1.24181	3.99634e-08	2.86937e-05	-0.389921	7.56903e-15
ARPC1B	0.175237	0.15975	-0.13349	9.01779e-06	0.00647477	-0.390517	6.83353e-15
ALDH7A1	0.0554151	0.0485248	-0.191557	5.85717e-09	4.20545e-06	-0.390967	6.32562e-15
TRIM15	0.50168	0.355908	-0.495262	9.90683e-17	7.11311e-14	-0.39176	5.51849e-15
CD28	0.792177	0.715251	-0.147373	6.06799e-05	0.0435682	-0.392973	4.47616e-15
GNPNAT1	0.157194	0.130353	-0.270128	1.80393e-07	0.000129522	-0.393393	4.16171e-15
SLC10A5	0.468224	0.334198	-0.486498	1.08862e-16	7.81632e-14	-0.393525	4.06792e-15
FBXL2	0.130424	0.232095	0.83151	1.17469e-05	0.00843427	-0.394523	3.42088e-15
ZNF599	0.0880602	0.0803416	-0.132343	1.13699e-06	0.00081636	-0.394657	3.34188e-15
CCL25	0.800563	0.739053	-0.115337	8.82896e-07	0.00063392	-0.395175	3.05324e-15
GOLGA6D	0.666584	0.572828	-0.218685	9.42121e-12	6.76443e-09	-0.396089	2.60335e-15
TMEM171	0.177697	0.154617	-0.200714	4.12072e-09	2.95867e-06	-0.397688	1.96662e-15
CASP8	0.48148	0.372506	-0.37021	5.39703e-12	3.87507e-09	-0.398801	1.61673e-15
FAM178B	0.874063	0.664152	-0.396223	1.49329e-21	1.07218e-18	-0.399428	1.44714e-15
LEAP2	0.468448	0.352793	-0.409069	2.39862e-11	1.72221e-08	-0.400803	1.13404e-15
FBXO40	0.329016	0.516495	0.650596	3.44548e-08	2.47386e-05	-0.40096	1.10291e-15
TACSTD2	0.219707	0.383961	0.805379	2.25677e-16	1.62036e-13	-0.401527	9.97079e-16
IL20RA	0.75351	0.796489	0.0800278	2.07654e-08	1.49096e-05	-0.401542	9.94347e-16
HAO1	0.458412	0.342257	-0.421564	9.02096e-08	6.47705e-05	-0.40165	9.7545e-16
DMRTB1	0.908415	0.757808	-0.261519	3.23522e-13	2.32289e-10	-0.402004	9.1579e-16
ZNF556	0.794522	0.690835	-0.201747	3.0997e-14	2.22558e-11	-0.402508	8.36982e-16
ZNF75A	0.162035	0.146564	-0.144775	1.74596e-05	0.012536	-0.402526	8.34225e-16
WNK2	0.278094	0.451915	0.700477	2.17314e-12	1.56031e-09	-0.403943	6.47255e-16
PRAME	0.630946	0.420384	-0.585808	3.92534e-21	2.8184e-18	-0.404207	6.17279e-16
ZNF880	0.0716859	0.173397	1.27432	4.29625e-12	3.08471e-09	-0.404991	5.36091e-16
ZIK1	0.182269	0.315002	0.78929	5.63838e-12	4.04836e-09	-0.405191	5.17077e-16
DDO	0.180837	0.144015	-0.328477	1.8606e-06	0.00133591	-0.405815	4.61991e-16
SLC16A11	0.125642	0.101738	-0.304462	1.9891e-14	1.42817e-11	-0.407745	3.25593e-16
MR1	0.353697	0.339779	-0.0579178	4.75417e-05	0.034135	-0.408188	3.00396e-16
HP	0.357184	0.28819	-0.309649	6.32014e-06	0.00453786	-0.410096	2.11973e-16
FGF2	0.569625	0.621684	0.12617	4.85841e-07	0.000348834	-0.412116	1.4621e-16
DMC1	0.0824853	0.140112	0.764374	6.9557e-05	0.0499419	-0.412812	1.28564e-16
TINAG	0.719129	0.515792	-0.479461	3.20593e-20	2.30186e-17	-0.413738	1.08295e-16
LIPC	0.38601	0.305676	-0.336634	3.75053e-08	2.69288e-05	-0.414614	9.20263e-17
ZNF563	0.13421	0.107482	-0.320399	6.28101e-15	4.50977e-12	-0.415404	7.94235e-17
ZNF385A	0.526308	0.623084	0.243519	3.89269e-07	0.000279495	-0.416402	6.59071e-17
LY96	0.785172	0.66008	-0.250369	1.80393e-07	0.000129522	-0.417997	4.8859e-17
SLC45A3	0.129326	0.156645	0.276492	5.39051e-06	0.00387038	-0.419467	3.70249e-17
NAA11	0.781402	0.500376	-0.643053	2.398e-20	1.72177e-17	-0.419671	3.56202e-17
MYO1A	0.818263	0.727656	-0.169309	1.73825e-06	0.00124806	-0.420613	2.97973e-17
TM4SF19	0.81376	0.659728	-0.302732	4.78855e-16	3.43818e-13	-0.421508	2.51343e-17
LRRC4	0.582429	0.676426	0.215851	4.90114e-12	3.51902e-09	-0.422667	2.01488e-17
RASL12	0.44318	0.545173	0.298821	6.2111e-08	4.45957e-05	-0.422864	1.94049e-17
IFT57	0.0566266	0.0868153	0.616468	5.41582e-10	3.88856e-07	-0.424559	1.40192e-17
MLF1	0.166052	0.270837	0.705789	2.26509e-10	1.62634e-07	-0.426532	9.57961e-18
AQP10	0.670167	0.549652	-0.286002	1.68746e-16	1.2116e-13	-0.426545	9.5549e-18
HPDL	0.132368	0.262611	0.98837	1.20464e-09	8.6493e-07	-0.42736	8.15753e-18
SEC16B	0.38957	0.259447	-0.586444	4.06347e-16	2.91757e-13	-0.429228	5.67046e-18
EN2	0.118101	0.220951	0.903701	3.62202e-07	0.000260061	-0.430429	4.48233e-18
SEMA4G	0.809128	0.713451	-0.181553	1.51006e-13	1.08423e-10	-0.43153	3.61009e-18
QSOX1	0.139791	0.234637	0.747162	3.78553e-11	2.71801e-08	-0.432547	2.95378e-18
FAM83F	0.352336	0.475014	0.431018	1.05552e-09	7.57862e-07	-0.432694	2.86961e-18
ZNF761	0.200363	0.301777	0.590869	1.56365e-18	1.1227e-15	-0.433543	2.42585e-18
TCP10L	0.697777	0.543282	-0.361066	1.82813e-15	1.3126e-12	-0.434025	2.20451e-18
SLC6A12	0.313111	0.270637	-0.210317	4.89005e-07	0.000351106	-0.434079	2.181e-18
FBLL1	0.163448	0.31798	0.960107	1.24774e-14	8.95878e-12	-0.435547	1.62846e-18
GPT	0.426381	0.326453	-0.385269	3.57965e-14	2.57019e-11	-0.435596	1.61258e-18
USP44	0.393602	0.564977	0.521453	1.89753e-21	1.36242e-18	-0.436258	1.41282e-18
RNF17	0.841771	0.60719	-0.47128	1.52922e-17	1.09798e-14	-0.436437	1.36316e-18
ZNF717	0.308034	0.249016	-0.30685	1.80546e-14	1.29632e-11	-0.436859	1.25264e-18
ZNF214	0.0666928	0.065368	-0.0289465	6.49751e-05	0.0466522	-0.438101	9.76265e-19
DAPK2	0.443768	0.332438	-0.416719	1.87754e-19	1.34808e-16	-0.439837	6.87813e-19
CENPV	0.101718	0.0896846	-0.181647	3.59918e-11	2.58421e-08	-0.441367	5.04238e-19
GFRA3	0.554297	0.641537	0.210873	2.2304e-09	1.60143e-06	-0.441657	4.75338e-19
IFNGR2	0.649094	0.678421	0.0637547	1.03557e-05	0.00743537	-0.441701	4.71113e-19
MYBPHL	0.736666	0.623121	-0.241498	3.52073e-17	2.52789e-14	-0.44347	3.28257e-19
TCTEX1D1	0.253696	0.380484	0.584734	7.6477e-15	5.49105e-12	-0.443583	3.20784e-19
GSTM5	0.51984	0.644712	0.310589	1.36855e-10	9.8262e-08	-0.44362	3.18363e-19
ITIH2	0.404114	0.287559	-0.490903	5.33705e-11	3.832e-08	-0.445475	2.17444e-19
APOB	0.39506	0.30521	-0.372268	4.55312e-11	3.26914e-08	-0.44608	1.91909e-19
ADAMTS10	0.440863	0.38194	-0.206984	1.85692e-05	0.0133327	-0.446136	1.89695e-19
TMEM98	0.139123	0.117634	-0.242054	4.86001e-09	3.48948e-06	-0.44622	1.86461e-19
SLC13A5	0.122415	0.24559	1.00448	2.31833e-13	1.66456e-10	-0.446305	1.83187e-19
CES1	0.19779	0.151832	-0.381487	8.17999e-07	0.000587323	-0.447164	1.53361e-19
GNE	0.196842	0.186251	-0.0797939	9.15227e-11	6.57133e-08	-0.447431	1.45098e-19
PALMD	0.322614	0.276294	-0.223604	3.59918e-11	2.58421e-08	-0.449101	1.02497e-19
STAP2	0.181035	0.150856	-0.263096	5.11718e-07	0.000367414	-0.449667	9.10718e-20
GALNT12	0.139711	0.327448	1.22882	9.72829e-08	6.98491e-05	-0.450883	7.06037e-20
ZNF701	0.243271	0.359464	0.563286	1.66446e-06	0.00119508	-0.451268	6.5122e-20
CP	0.515373	0.410088	-0.329681	2.93393e-07	0.000210656	-0.454107	3.57586e-20
PRTFDC1	0.114764	0.106141	-0.112679	1.3262e-08	9.52212e-06	-0.454573	3.2394e-20
GIMAP2	0.31451	0.182768	-0.783092	1.00206e-10	7.19476e-08	-0.456084	2.34791e-20
IFFO1	0.268448	0.234844	-0.19294	1.16536e-14	8.3673e-12	-0.457365	1.78512e-20
HDGFL1	0.912631	0.739656	-0.303177	9.69588e-11	6.96164e-08	-0.458245	1.47785e-20
ZC3HAV1L	0.157941	0.30739	0.960685	2.07654e-07	0.000149095	-0.458568	1.37853e-20
AADAC	0.584911	0.520558	-0.168159	2.11753e-06	0.00152039	-0.459796	1.05792e-20
ZNF347	0.154597	0.223894	0.534305	6.36238e-05	0.0456819	-0.45992	1.02997e-20
ADCY10	0.528102	0.370412	-0.511686	4.46086e-14	3.20289e-11	-0.461545	7.24072e-21
MFSD2A	0.122884	0.184498	0.586307	2.15386e-12	1.54647e-09	-0.46195	6.63e-21
UGT2B7	0.416341	0.315691	-0.399255	6.84499e-08	4.91471e-05	-0.465412	3.10747e-21
BAIAP2L2	0.641368	0.456041	-0.491988	1.08743e-13	7.80773e-11	-0.46689	2.24313e-21
C4BPA	0.390156	0.268994	-0.536479	3.83169e-12	2.75115e-09	-0.468695	1.50286e-21
BCL2L15	0.853986	0.706569	-0.273382	2.15545e-17	1.54761e-14	-0.471154	8.6748e-22
SPP2	0.704236	0.60094	-0.228838	5.6011e-09	4.02159e-06	-0.471324	8.35126e-22
DMGDH	0.144045	0.117542	-0.293341	6.7091e-07	0.000481713	-0.472592	6.27874e-22
CDS1	0.105335	0.199594	0.922075	3.96165e-05	0.0284447	-0.472634	6.21905e-22
RASL11B	0.409355	0.593071	0.534851	1.38425e-18	9.93891e-16	-0.47349	5.12721e-22
F10	0.435271	0.330221	-0.398483	5.63496e-15	4.0459e-12	-0.474062	4.50421e-22
SLC5A10	0.830244	0.710902	-0.223885	4.56536e-06	0.00327793	-0.47512	3.54289e-22
LAG3	0.448819	0.639349	0.510471	7.17735e-19	5.15334e-16	-0.477968	1.84912e-22
XDH	0.514251	0.412682	-0.317441	9.30447e-11	6.68061e-08	-0.478343	1.69676e-22
RXFP4	0.701915	0.628033	-0.160455	1.36791e-07	9.82161e-05	-0.478681	1.56977e-22
F5	0.120471	0.0950816	-0.341453	9.49021e-15	6.81397e-12	-0.478869	1.50327e-22
LIME1	0.263355	0.459398	0.802737	1.12277e-06	0.000806146	-0.479525	1.29258e-22
ZNF93	0.058062	0.127538	1.13526	5.31609e-09	3.81695e-06	-0.480038	1.14833e-22
PLIN5	0.127542	0.104198	-0.291654	7.25098e-10	5.2062e-07	-0.481177	8.82311e-23
SLCO4C1	0.0613518	0.177269	1.53077	8.02475e-08	5.76177e-05	-0.482332	6.74651e-23
ITIH4	0.355913	0.293528	-0.278027	1.44408e-07	0.000103685	-0.483076	5.67233e-23
MUC13	0.677263	0.517967	-0.386857	2.54368e-13	1.82637e-10	-0.483392	5.26994e-23
KPNA7	0.915482	0.79515	-0.203303	2.12846e-14	1.52823e-11	-0.484996	3.61919e-23
PAQR8	0.275275	0.363851	0.402474	2.43797e-06	0.00175046	-0.486425	2.58617e-23
LDHB	0.204338	0.432302	1.08109	1.447e-18	1.03895e-15	-0.490036	1.09785e-23
SP100	0.325213	0.319975	-0.0234249	8.13618e-08	5.84177e-05	-0.490472	9.8919e-24
VNN2	0.796388	0.688901	-0.209175	1.43662e-08	1.03149e-05	-0.492513	6.0638e-24
SLC45A2	0.717046	0.613327	-0.225411	1.93242e-08	1.38748e-05	-0.492785	5.67926e-24
GLYATL1	0.574199	0.80721	0.491394	5.3512e-18	3.84216e-15	-0.492901	5.52257e-24
ABCC2	0.570657	0.465822	-0.292845	9.82771e-09	7.05629e-06	-0.493353	4.95297e-24
S100A16	0.537417	0.481398	-0.158812	5.50222e-10	3.95059e-07	-0.494518	3.73684e-24
GPD1L	0.105541	0.103792	-0.0241075	7.21073e-09	5.1773e-06	-0.495425	2.99868e-24
SLC2A5	0.576549	0.471773	-0.289351	4.70324e-06	0.00337693	-0.496976	2.05529e-24
CA9	0.713796	0.598831	-0.253363	5.95477e-10	4.27553e-07	-0.4979	1.63957e-24
MBL2	0.377501	0.319261	-0.241745	6.50835e-06	0.004673	-0.499169	1.20097e-24
ZFP3	0.216381	0.336869	0.638611	3.07596e-08	2.20854e-05	-0.500089	9.57448e-25
MT1E	0.0794411	0.147316	0.890958	2.5201e-05	0.0180943	-0.500491	8.66965e-25
ZNF141	0.117097	0.204985	0.807821	1.44103e-13	1.03466e-10	-0.501185	7.30187e-25
TSPAN8	0.459042	0.33685	-0.44652	1.13207e-09	8.12825e-07	-0.503781	3.8297e-25
ADHFE1	0.0838859	0.0837536	-0.002278	1.70946e-07	0.000122739	-0.504254	3.40252e-25
HIST3H2BB	0.141365	0.328798	1.21778	1.0974e-09	7.87933e-07	-0.505436	2.52996e-25
SLC38A4	0.272292	0.250314	-0.121419	4.2486e-05	0.030505	-0.507715	1.42465e-25
KCNE1	0.649478	0.777021	0.258672	4.95794e-18	3.5598e-15	-0.509653	8.71129e-26
C5orf58	0.871344	0.607923	-0.519355	6.61523e-13	4.74974e-10	-0.510341	7.31099e-26
RPL10L	0.836366	0.673102	-0.31331	1.73724e-13	1.24734e-10	-0.510867	6.39145e-26
CYP7A1	0.483854	0.385131	-0.329224	9.44425e-06	0.00678097	-0.511342	5.6597e-26
RFPL4B	0.866752	0.668714	-0.374229	9.69018e-20	6.95755e-17	-0.51739	1.18476e-26
TFR2	0.303918	0.229282	-0.406563	2.81573e-10	2.02169e-07	-0.51752	1.14517e-26
MTHFD2	0.341912	0.476998	0.480357	3.94801e-11	2.83467e-08	-0.518374	9.15773e-27
DPYS	0.324713	0.297776	-0.124939	2.04084e-06	0.00146532	-0.51838	9.14253e-27
SLC16A1	0.133848	0.128585	-0.0578655	1.918e-12	1.37712e-09	-0.518576	8.68484e-27
RNF43	0.215056	0.177977	-0.273022	7.40206e-06	0.00531468	-0.520301	5.51764e-27
CYP4A22	0.286672	0.255608	-0.165471	4.5113e-06	0.00323912	-0.521714	3.79843e-27
WBP2NL	0.338569	0.248531	-0.446023	4.66894e-11	3.3523e-08	-0.522964	2.7253e-27
ZNF233	0.427577	0.530813	0.312018	2.35857e-05	0.0169345	-0.524263	1.92784e-27
PRDM9	0.623182	0.423446	-0.557476	5.92008e-15	4.25062e-12	-0.524614	1.75482e-27
ZC3H12D	0.610664	0.413141	-0.563745	9.72267e-18	6.98088e-15	-0.524966	1.597e-27
ZNF572	0.159663	0.142392	-0.165163	4.95394e-07	0.000355693	-0.526115	1.17329e-27
BMP8B	0.0958519	0.207143	1.11175	8.9988e-07	0.000646114	-0.527426	8.24258e-28
SLC22A9	0.38534	0.290794	-0.406132	3.70854e-09	2.66273e-06	-0.528161	6.75674e-28
CARD6	0.385964	0.242995	-0.667541	9.07708e-11	6.51735e-08	-0.529172	5.13752e-28
TMEM156	0.62806	0.485529	-0.371345	1.68447e-17	1.20945e-14	-0.531084	3.05149e-28
CPN1	0.451932	0.366908	-0.300688	1.22605e-06	0.000880305	-0.532362	2.15028e-28
PAH	0.0719375	0.0601644	-0.257834	5.55451e-14	3.98814e-11	-0.533564	1.54469e-28
APOE	0.175993	0.145739	-0.272136	1.67948e-09	1.20586e-06	-0.535172	9.90531e-29
FAM169A	0.312102	0.268643	-0.216326	4.10161e-10	2.94495e-07	-0.538399	4.03177e-29
APCS	0.470402	0.363774	-0.370851	9.30447e-11	6.68061e-08	-0.538425	4.00281e-29
APOM	0.546758	0.421584	-0.375082	3.68069e-09	2.64273e-06	-0.538888	3.51506e-29
HYAL1	0.515452	0.478929	-0.106026	2.87528e-05	0.0206445	-0.538934	3.47004e-29
ZNF577	0.31254	0.448066	0.519671	5.78626e-06	0.00415453	-0.53918	3.23821e-29
APOL1	0.253273	0.195778	-0.371471	1.28124e-12	9.19932e-10	-0.539758	2.75324e-29
APOC1	0.312983	0.217942	-0.522139	6.30343e-17	4.52586e-14	-0.54049	2.24005e-29
ZNF716	0.671462	0.432949	-0.633108	6.49005e-19	4.65986e-16	-0.542245	1.36345e-29
AKR1E2	0.529886	0.614962	0.214816	1.46827e-13	1.05422e-10	-0.542695	1.19988e-29
MIF	0.183828	0.173788	-0.0810287	5.02075e-06	0.0036049	-0.543082	1.07484e-29
KIAA1143	0.413178	0.166042	-1.31521	1.41269e-19	1.01431e-16	-0.545009	6.2025e-30
SELENBP1	0.503933	0.412339	-0.289401	7.4549e-14	5.35262e-11	-0.546127	4.49974e-30
PGC	0.782476	0.637009	-0.296732	5.24868e-11	3.76855e-08	-0.54647	4.07778e-30
ZMYND15	0.322955	0.238137	-0.439546	4.53089e-05	0.0325318	-0.547339	3.17444e-30
DKK4	0.717019	0.569221	-0.333024	3.93888e-09	2.82812e-06	-0.547529	3.00488e-30
UGT1A10	0.838465	0.765593	-0.131173	2.42076e-07	0.000173811	-0.547763	2.80872e-30
SLC25A36	0.0839235	0.269344	1.6823	1.865e-10	1.33907e-07	-0.547964	2.64954e-30
RAMP1	0.347006	0.306663	-0.17831	1.42466e-07	0.000102291	-0.549021	1.95062e-30
SLC22A3	0.265723	0.250233	-0.08665	3.75354e-05	0.0269504	-0.549976	1.47812e-30
MBOAT2	0.211828	0.351603	0.731053	1.59295e-11	1.14374e-08	-0.551792	8.69544e-31
ZNF781	0.132452	0.276694	1.06283	8.86658e-09	6.36621e-06	-0.553456	5.33368e-31
F2	0.382008	0.298322	-0.356732	4.24645e-09	3.04895e-06	-0.553773	4.85854e-31
BBS7	0.0355706	0.079	1.15117	9.34171e-13	6.70735e-10	-0.554393	4.04565e-31
GYS2	0.544442	0.492256	-0.145368	5.63556e-05	0.0404633	-0.555146	3.23756e-31
F7	0.439952	0.371617	-0.243529	1.82767e-09	1.31227e-06	-0.555463	2.94738e-31
ZNF471	0.121415	0.232578	0.937767	4.37882e-06	0.003144	-0.557342	1.68497e-31
HNF4A	0.431237	0.323617	-0.414197	8.00741e-13	5.74932e-10	-0.557983	1.39154e-31
ZNF695	0.171018	0.312941	0.871738	4.89935e-08	3.51773e-05	-0.558784	1.09468e-31
DEPDC7	0.135615	0.109779	-0.30492	3.51941e-08	2.52694e-05	-0.558837	1.07729e-31
C1QTNF3	0.723164	0.742967	0.0389754	3.13798e-05	0.0225307	-0.559204	9.64893e-32
ZNF879	0.105189	0.208606	0.9878	5.25436e-08	3.77263e-05	-0.565375	1.48252e-32
KLHDC9	0.121522	0.113601	-0.0972441	1.8606e-06	0.00133591	-0.56587	1.27349e-32
ALG1L	0.402614	0.236885	-0.765209	1.53653e-16	1.10323e-13	-0.566011	1.21961e-32
ANKRD33	0.567107	0.663091	0.225584	2.71909e-09	1.95231e-06	-0.566116	1.18081e-32
GPLD1	0.551065	0.490858	-0.166918	5.26445e-06	0.00377987	-0.567506	7.69414e-33
TUBA3C	0.838766	0.618254	-0.440069	5.69088e-15	4.08605e-12	-0.568034	6.53443e-33
ADORA2A	0.618846	0.483658	-0.355592	9.2927e-16	6.67216e-13	-0.568712	5.29593e-33
EHHADH	0.1767	0.139258	-0.343535	3.28653e-09	2.35973e-06	-0.56901	4.8282e-33
ANXA9	0.493809	0.388909	-0.344521	1.70582e-11	1.22478e-08	-0.570283	3.24944e-33
TRIM31	0.732138	0.468022	-0.64554	8.67745e-19	6.23041e-16	-0.571402	2.29032e-33
PRAP1	0.314184	0.26178	-0.263254	1.44008e-12	1.03398e-09	-0.5726	1.57263e-33
NKAPL	0.449603	0.601351	0.419557	3.75393e-15	2.69532e-12	-0.573732	1.10102e-33
CHI3L1	0.476572	0.374121	-0.349188	1.51407e-07	0.00010871	-0.573934	1.03298e-33
CCNI2	0.19474	0.313348	0.686219	5.35446e-07	0.000384451	-0.574078	9.87204e-34
MOGAT3	0.315806	0.236347	-0.418132	7.10062e-18	5.09824e-15	-0.574976	7.43035e-34
HHIPL2	0.60292	0.472798	-0.350744	7.00408e-17	5.02893e-14	-0.574985	7.40704e-34
C4BPB	0.361277	0.215223	-0.747277	4.93805e-16	3.54552e-13	-0.575724	5.85861e-34
AFP	0.915197	0.833663	-0.134618	8.93209e-09	6.41324e-06	-0.577822	3.00143e-34
HIST3H2A	0.102486	0.284276	1.47187	8.92183e-14	6.40587e-11	-0.580111	1.43841e-34
EID3	0.43216	0.532009	0.299884	5.51945e-06	0.00396297	-0.582107	7.53798e-35
ISYNA1	0.292805	0.393415	0.426111	7.70712e-09	5.53371e-06	-0.582448	6.74802e-35
DAO	0.378772	0.284983	-0.410456	7.14117e-11	5.12736e-08	-0.583464	4.84556e-35
APOC4	0.505127	0.444471	-0.184556	1.50772e-09	1.08254e-06	-0.585081	2.85453e-35
FCHSD1	0.192726	0.374814	0.959621	4.99106e-06	0.00358358	-0.585156	2.78534e-35
VAMP8	0.316182	0.296023	-0.0950457	8.42133e-08	6.04652e-05	-0.585804	2.25125e-35
SLC16A5	0.532957	0.594583	0.157861	4.52313e-07	0.00032476	-0.586922	1.55734e-35
PZP	0.706527	0.875299	0.309032	3.50153e-15	2.5141e-12	-0.587345	1.35398e-35
GLB1L2	0.133712	0.313899	1.23117	3.37656e-16	2.42437e-13	-0.587467	1.30047e-35
RBP1	0.253893	0.357695	0.494508	6.47548e-08	4.64939e-05	-0.588465	9.34068e-36
PIPOX	0.160283	0.109929	-0.544046	1.9891e-14	1.42817e-11	-0.59033	5.01957e-36
SERPINA11	0.238944	0.203897	-0.228831	1.60479e-05	0.0115224	-0.590762	4.34355e-36
ALKBH3	0.152168	0.206301	0.439081	5.63838e-12	4.04836e-09	-0.593216	1.9039e-36
HMGCS2	0.391333	0.312902	-0.322683	2.63907e-07	0.000189485	-0.594657	1.16899e-36
SERPINF1	0.341712	0.294337	-0.215314	6.47028e-06	0.00464566	-0.595037	1.02768e-36
MYOM1	0.553053	0.40282	-0.457282	1.83737e-08	1.31923e-05	-0.601616	1.07087e-37
GTSF1	0.793142	0.577395	-0.458019	8.59113e-14	6.16843e-11	-0.603022	6.5617e-38
APOC3	0.400325	0.334832	-0.257733	1.13075e-07	8.11879e-05	-0.60619	2.15546e-38
PDZK1	0.537373	0.375814	-0.515908	4.41971e-21	3.17335e-18	-0.606711	1.79261e-38
GPR180	0.301733	0.36536	0.276049	1.49716e-10	1.07496e-07	-0.607793	1.2213e-38
LXN	0.52879	0.664612	0.329818	9.8629e-13	7.08157e-10	-0.607873	1.18735e-38
SLC2A2	0.256322	0.228591	-0.165191	2.1947e-05	0.015758	-0.608601	9.16249e-39
CCL16	0.354111	0.303417	-0.222904	1.89891e-05	0.0136342	-0.608751	8.6848e-39
ZFP82	0.20133	0.324868	0.690291	3.3835e-06	0.00242935	-0.610232	5.11551e-39
F12	0.545847	0.475113	-0.200226	1.1146e-09	8.00285e-07	-0.611338	3.43838e-39
FTCD	0.420486	0.366285	-0.199091	3.59457e-05	0.025809	-0.613503	1.57241e-39
ZFP28	0.0732506	0.23026	1.65235	7.62565e-07	0.000547522	-0.614392	1.13853e-39
AGXT	0.416066	0.343428	-0.276803	3.61517e-06	0.00259569	-0.617292	3.94274e-40
QPRT	0.495775	0.445666	-0.153725	8.54599e-09	6.13602e-06	-0.618247	2.77414e-40
CYP4A11	0.331206	0.289752	-0.192906	1.72648e-05	0.0123961	-0.621351	8.76938e-41
SPARCL1	0.831683	0.718538	-0.210971	1.44008e-12	1.03398e-09	-0.622165	6.47008e-41
APOA1	0.522215	0.475594	-0.134911	2.39368e-06	0.00171866	-0.623232	4.33808e-41
AKR1C2	0.509141	0.378694	-0.427035	3.34195e-16	2.39952e-13	-0.624161	3.05832e-41
PODXL2	0.299545	0.42783	0.514265	2.11753e-06	0.00152039	-0.625178	2.08282e-41
SERPINA5	0.318799	0.302162	-0.0773275	1.90711e-06	0.0013693	-0.629011	4.83813e-42
C2	0.273047	0.209412	-0.382806	4.57735e-09	3.28654e-06	-0.629264	4.39113e-42
AGXT2	0.644453	0.577057	-0.159362	7.43784e-08	5.34037e-05	-0.630006	3.30104e-42
CCL15	0.295182	0.224092	-0.397512	6.30948e-09	4.53021e-06	-0.631909	1.5828e-42
TSTD1	0.454142	0.422499	-0.104198	1.19532e-09	8.58243e-07	-0.635544	3.83141e-43
RNF135	0.310293	0.533756	0.782549	2.13251e-17	1.53114e-14	-0.637519	1.75882e-43
LGALS4	0.516832	0.456216	-0.179978	3.62202e-07	0.000260061	-0.6387	1.10088e-43
ZNF354C	0.131879	0.215685	0.709712	1.33844e-06	0.000961003	-0.642883	2.06081e-44
HSD17B6	0.192683	0.166689	-0.20907	1.27878e-08	9.18163e-06	-0.646697	4.3717e-45
ITIH3	0.43435	0.377946	-0.200679	1.11572e-06	0.000801086	-0.653788	2.3045e-46
MIOX	0.692229	0.571872	-0.275557	1.35312e-09	9.71543e-07	-0.653951	2.15166e-46
SPP1	0.740922	0.529111	-0.485749	8.35449e-15	5.99852e-12	-0.654753	1.53484e-46
PLA2G12B	0.447641	0.360651	-0.311737	1.46825e-08	1.05421e-05	-0.657046	5.80666e-47
SLC1A5	0.253323	0.203157	-0.31838	6.29159e-07	0.000451736	-0.657499	4.78608e-47
ARHGEF2	0.333571	0.229531	-0.539308	5.88071e-14	4.22235e-11	-0.660814	1.15321e-47
OXT	0.648267	0.723502	0.158409	5.75224e-06	0.00413011	-0.660931	1.09662e-47
APOA2	0.38739	0.274087	-0.499149	1.68685e-15	1.21116e-12	-0.666874	8.15876e-49
B3GNT8	0.578129	0.636343	0.138413	2.28154e-05	0.0163815	-0.670522	1.60684e-49
FUZ	0.0421575	0.156384	1.89123	5.07607e-12	3.64462e-09	-0.671442	1.06258e-49
MARVELD1	0.635947	0.706321	0.151418	8.41639e-10	6.04297e-07	-0.675646	1.57632e-50
IL20RB	0.793597	0.868624	0.130326	3.48297e-13	2.50077e-10	-0.676189	1.22905e-50
ENPP7	0.585462	0.529291	-0.145513	4.49378e-07	0.000322653	-0.680165	1.95581e-51
CPN2	0.455506	0.404638	-0.170837	1.35442e-05	0.00972475	-0.684295	2.80957e-52
DCAF4L2	0.900651	0.507915	-0.826382	3.20437e-23	2.30074e-20	-0.684372	2.7094e-52
SPINT2	0.166227	0.386334	1.2167	5.5406e-12	3.97815e-09	-0.684862	2.14689e-52
HSD17B14	0.250548	0.172776	-0.536189	7.92337e-07	0.000568898	-0.687262	6.83195e-53
SERPINA4	0.550075	0.479382	-0.198453	1.10175e-06	0.000791056	-0.690745	1.27079e-53
CCNJ	0.201072	0.362468	0.850145	5.51818e-09	3.96206e-06	-0.692331	5.86398e-54
GSTM1	0.336094	0.522306	0.636029	3.71827e-07	0.000266972	-0.696118	9.05406e-55
SERP2	0.262157	0.356146	0.442037	1.12277e-06	0.000806146	-0.6976	4.32529e-55
FMO3	0.385903	0.302777	-0.349982	5.95719e-08	4.27726e-05	-0.698513	2.73769e-55
NSUN7	0.258952	0.412581	0.671991	4.25783e-11	3.05712e-08	-0.699053	2.08712e-55
ABCG8	0.438819	0.377833	-0.215881	2.93393e-07	0.000210656	-0.705428	8.0844e-57
MKRN3	0.834864	0.560267	-0.575428	9.80902e-19	7.04287e-16	-0.708012	2.11234e-57
APOC2	0.396403	0.325952	-0.282308	1.59013e-08	1.14171e-05	-0.716409	2.42662e-59
RAB25	0.762629	0.807028	0.081636	4.10161e-10	2.94495e-07	-0.72043	2.69729e-60
LRFN4	0.419205	0.545365	0.379565	1.45763e-08	1.04658e-05	-0.723367	5.29211e-61
BHMT2	0.217814	0.174777	-0.317579	1.00858e-06	0.000724159	-0.723568	4.72926e-61
SERPINC1	0.525761	0.392058	-0.42334	6.91682e-10	4.96628e-07	-0.723611	4.61826e-61
S100P	0.765222	0.622514	-0.297772	6.34324e-15	4.55444e-12	-0.726152	1.10722e-61
FES	0.241734	0.418641	0.792292	3.62559e-09	2.60317e-06	-0.726438	9.41857e-62
CSTA	0.541531	0.391215	-0.46908	1.51148e-08	1.08524e-05	-0.72829	3.2889e-62
CNKSR1	0.692419	0.74555	0.106659	1.44974e-05	0.0104091	-0.733707	1.43952e-63
NR1I2	0.55972	0.535508	-0.0637991	5.48832e-05	0.0394061	-0.736304	3.1272e-64
NR1I3	0.33305	0.269607	-0.304876	3.46996e-08	2.49143e-05	-0.736358	3.02888e-64
PDZK1IP1	0.551544	0.481724	-0.195269	1.69571e-06	0.00121752	-0.741017	1.86755e-65
ABCG5	0.451625	0.391592	-0.205774	8.51055e-06	0.00611058	-0.7411	1.77548e-65
CYP17A1	0.788027	0.660223	-0.255293	5.67366e-08	4.07369e-05	-0.741504	1.39006e-65
IFITM1	0.440336	0.575689	0.386686	1.02314e-09	7.34613e-07	-0.741802	1.16083e-65
CLDN15	0.547333	0.435724	-0.329002	1.19754e-08	8.59832e-06	-0.751817	2.30783e-68
IFI27	0.726595	0.544533	-0.416133	7.54143e-10	5.41475e-07	-0.781352	3.81705e-77
THRSP	0.487595	0.610518	0.32435	1.60479e-05	0.0115224	-0.792371	8.83431e-81
BST2	0.317244	0.231723	-0.453188	1.41728e-05	0.0101761	-0.814736	6.91389e-89
KRTCAP3	0.558985	0.735449	0.395814	8.78234e-11	6.30572e-08	-0.815323	4.09391e-89
DQX1	0.876243	0.789586	-0.150236	3.01648e-06	0.00216583	-0.818962	1.52686e-90
SFN	0.846578	0.620378	-0.448495	8.68312e-24	6.23448e-21	-0.841168	5.1392e-100
