# Supplementary material for: Integrative analysis of DNA methylation and gene expression reveals distinct hepatocellular carcinoma subtypes with therapeutic implications
Source: Aging (Albany NY). 2020 Mar 22;12(6):4970–95. doi: 10.18632/aging.102923 (PMC7138576; doi:10.18632/aging.102923)
Supplement: Supplementary Table 3 [file aging-12-102923-s002..xlsx]

## Sheet: Table S3
List of 401 methylation driven genes (MDGs)
All 401 MDGs	Metabolism associated MDGs	Immune associated MDGs	Putative methylation driven TSGs
A1CF	A1CF	ADAMTS10	ADRA1A
AADAC	AADAC	ADORA2A	APCS
ABCC2	ABCC2	AKNA	APOA1
ABCG5	ABCG5	APOC1	APOC3
ABCG8	ABCG8	APOC2	ARHGAP10
ADAD1	ADAD1	APOE	CPN2
ADAM32	ADCY10	AZGP1	DEPDC7
ADAMTS10	ADCY5	BST2	FABP1
ADCY10	ADHFE1	C2	FAM13A
ADCY5	AGXT	CCL15	FAM83F
ADHFE1	AGXT2	CCL16	FGG
ADORA2A	AKR1B10	CCL25	GNA14
ADRA1A	AKR1C2	CD28	HP
AFP	AKR7A3	CLIP3	LEAP2
AGXT	ALDH7A1	CR1L	LRRC4
AGXT2	AQP10	CTHRC1	MBL2
AKNA	ASPG	DOK2	MFSD2A
AKR1B10	B3GNT8	F5	MT1A
AKR1C2	BHMT2	FGL2	MT1E
AKR1E2	CA9	FKBP11	MT1M
AKR7A3	CDS1	GFRA3	NR1I2
ALDH7A1	CES1	GIMAP2	OXT
ALG1L	CHI3L1	IFFO1	PGLYRP2
ALKBH3	CHST4	IFI27	PZP
ANKRD30A	COX7B2	IFITM1	RIC3
ANKRD33	CP	IFNGR2	SERPINA11
ANKS4B	CYP17A1	IL20RA	SERPINA4
ANXA9	CYP3A43	IL20RB	SLC22A10
APCS	CYP4A11	LAG3	SPP2
APOA1	CYP4A22	LGALS2	TACSTD2
APOA2	CYP7A1	LIME1	TCTEX1D1
APOB	DAO	LY96	THRSP
APOC1	DDO	MR1
APOC2	DMGDH	NOD2
APOC3	DPYS	NR5A2
APOC4	EHHADH	PDZK1IP1
APOE	ELOVL4	RASL12
APOL1	ENPP7	RIN1
APOM	FMO3	S100A16
AQP10	FTCD	S100A2
ARHGAP10	GALNT12	SELENBP1
ARHGEF2	GLB1L2	SERPINF1
ARPC1B	GLT1D1	SFN
ASPG	GLYATL1	SP100
AZGP1	GNE	SPARCL1
B3GNT8	GNPNAT1	TMEM156
BAIAP2L2	GPD1L	UNC93B1
BBS7	GPLD1	VNN2
BCL10	GPT	ZC3H12D
BCL2L15	GSTM1	ZMYND15
BHMT2	GSTM5	ZNF620
BMP8B	GSTP1
BRDT	GYS2
BST2	HAAO
C1QTNF3	HAO1
C1QTNF6	HMGCS2
C2	HPDL
C4BPA	HSD17B14
C4BPB	HSD17B6
C4orf33	HYAL1
C5orf58	ISYNA1
CA9	KCNC4
CARD6	KCNE1
CASP8	KCNH8
CCL15	KCNMB3
CCL16	LDHB
CCL25	LIPC
CCNI2	MBOAT2
CCNJ	MIOX
CD28	MOGAT3
CDS1	MTHFD2
CENPV	PAH
CES1	PIPOX
CHI3L1	PLA2G12B
CHST4	PON3
CLDN15	QPRT
CLIP3	SLC10A5
CNKSR1	SLC12A8
COX7B2	SLC13A5
CP	SLC16A1
CPN1	SLC16A11
CPN2	SLC16A5
CR1L	SLC1A5
CREB3L3	SLC22A3
CSTA	SLC22A9
CTHRC1	SLC25A36
CYP17A1	SLC26A1
CYP3A43	SLC2A2
CYP4A11	SLC2A5
CYP4A22	SLC38A4
CYP7A1	SLC45A2
DAO	SLC45A3
DAPK2	SLC5A10
DBNDD2	SLC6A12
DCAF4L2	SLCO4C1
DDO	TTYH3
DEPDC7	UCP2
DKK3	UGT1A10
DKK4	UGT2B7
DMC1	XDH
DMGDH
DMRTB1
DOK2
DPYS
DQX1
EHHADH
EID3
ELOVL4
EN2
ENDOD1
ENPP7
EPHA6
F10
F12
F2
F2RL2
F5
F7
FABP1
FAM13A
FAM169A
FAM178B
FAM83F
FBLL1
FBXL2
FBXO40
FCHSD1
FES
FGF19
FGF2
FGG
FGL2
FKBP11
FMO3
FTCD
FUZ
FZD8
GALNT12
GFRA3
GIMAP2
GLB1L2
GLT1D1
GLYATL1
GNA14
GNE
GNPNAT1
GOLGA6D
GPD1L
GPLD1
GPR150
GPR180
GPT
GRHL2
GSTM1
GSTM5
GSTP1
GTSF1
GYS2
HAAO
HAO1
HDGFL1
HHIPL2
HIST1H2BH
HIST1H3G
HIST1H4J
HIST3H2A
HIST3H2BB
HMGCS2
HNF4A
HP
HPDL
HSD17B14
HSD17B6
HYAL1
IFFO1
IFI27
IFITM1
IFNGR2
IFT57
IGF1R
IL20RA
IL20RB
INSL6
ISYNA1
ITIH2
ITIH3
ITIH4
KCNC4
KCNE1
KCNH8
KCNMB3
KIAA1143
KIF5C
KLHDC8B
KLHDC9
KLHL30
KPNA7
KRT80
KRTCAP3
LAG3
LDHB
LEAP2
LGALS2
LGALS4
LIME1
LIPC
LRFN4
LRRC4
LRRC61
LXN
LY75
LY96
MARVELD1
MBL2
MBOAT2
MFSD2A
MIF
MIOX
MIXL1
MKRN3
MLF1
MNX1
MOGAT3
MR1
MT1A
MT1E
MT1M
MTHFD2
MUC13
MYBPHL
MYO10
MYO18B
MYO1A
MYOM1
NAA11
NAIF1
NECAB3
NEFM
NETO2
NHSL1
NKAPL
NOD2
NPTX2
NR1I2
NR1I3
NR5A2
NSUN7
OSBPL9
OXT
PAH
PALMD
PAQR8
PDZK1
PDZK1IP1
PGC
PGLYRP2
PIPOX
PLA2G12B
PLIN5
PODXL2
PON3
POTEC
POU4F1
PPP1R3C
PRAME
PRAP1
PRDM9
PRTFDC1
PSD3
PSMG3
PTPRN2
PZP
QPRT
QSOX1
RAB25
RAB31
RAMP1
RASL11B
RASL12
RBP1
RBP2
RDM1
RFPL4B
RIC3
RIN1
RNF135
RNF17
RNF212
RNF43
RPL10L
RXFP4
S100A16
S100A2
S100P
SDK1
SEC16B
SELENBP1
SEMA4G
SERP2
SERPINA11
SERPINA4
SERPINA5
SERPINC1
SERPINF1
SFN
SLC10A5
SLC12A8
SLC13A5
SLC16A1
SLC16A11
SLC16A5
SLC1A5
SLC22A10
SLC22A3
SLC22A9
SLC25A36
SLC26A1
SLC2A2
SLC2A5
SLC38A4
SLC45A2
SLC45A3
SLC5A10
SLC6A12
SLCO4C1
SLFN12
SP100
SPARCL1
SPINT2
SPP1
SPP2
STAP2
TACSTD2
TCP10L
TCTEX1D1
TFR2
THOC6
THRSP
TINAG
TM4SF19
TMEM156
TMEM171
TMEM98
TMPRSS12
TRIM15
TRIM31
TRIM60
TSPAN8
TSTD1
TTYH3
TUBA3C
UCP2
UGT1A10
UGT2B7
UNC93B1
USP44
VAMP8
VNN2
WBP2NL
WNK2
XDH
XKR6
ZC3H12D
ZC3HAV1L
ZFP28
ZFP3
ZFP82
ZIK1
ZMYND15
ZNF132
ZNF141
ZNF175
ZNF214
ZNF229
ZNF233
ZNF334
ZNF347
ZNF354C
ZNF385A
ZNF471
ZNF483
ZNF556
ZNF563
ZNF572
ZNF577
ZNF582
ZNF586
ZNF595
ZNF599
ZNF620
ZNF667
ZNF695
ZNF701
ZNF716
ZNF717
ZNF75A
ZNF761
ZNF781
ZNF879
ZNF880
ZNF93
