# Supplementary material for: Integrative analysis of DNA methylation and gene expression reveals distinct hepatocellular carcinoma subtypes with therapeutic implications
Source: Aging (Albany NY). 2020 Mar 22;12(6):4970–95. doi: 10.18632/aging.102923 (PMC7138576; doi:10.18632/aging.102923)
Supplement: Supplementary Table 7 [file aging-12-102923-s001..xlsx]

## Sheet: Table S7
Specific amplification and deletion regions in distinct HCC classification
Amplification Regions （ARs）
Specific ARs in HS1	1q42.2	2q33.1	3p25.2	5q31.3	6p22.3	6p22.1	7q31.1	7q32.2	9p13.3	9q22.2	10p11.22	12p13.31	12q23.1	13q32.3	16q12.1	17q23.2	18q22.3	19p13.3
Specific ARs in HS2	3p23	4p14	7q21.3	7q31.2	8q11.1	13q31.3
Specific ARs in HS3	1p36.23	1p36.22	1p36.13	1p34.2	1p31.3	1q23.3	1q25.2	2p24.1	2p15	2p11.2	2q33.2	3p21.2	3q25.1	4q35.1	5p14.1	5p13.3	5q15	6p24.1	6p12.1	7q36.1	8p11.21	8q22.2	9p24.2	10q25.2	11q12.2	12p11.23	12q13.2	12q13.3	15q21.3	16p13.3	17q23.1	19p13.2	19q13.11	20p11.21	20q11.22	20q13.33	22q13.1
Specific ARs in HS4	1q42.3	4q33	6q13	8p11.22	8q21.3	13q32.2	17q12	19q13.2
Deletion regions (DRs)
Specific DRs in HS1	2p15	2q31.1	2q35	3p21.1	3p12.2	3q26.31	4q21.23	7q34	10q25.2	12p12.1	14q24.3	15q26.1	17p13.3	17q12	22q12.1
Specific DRs in HS2	1p21.3	3p12.3	3q29	4q21.3	4q34.2	6q25.3	13q13.3
Specific DRs in HS3	2q22.2	4q12	6p21.31	6q16.1	8p12	10q22.3	11q14.1	11q25	13q31.3	14q23.3	17p11.2	18q21.1	22q13.31
Specific DRs in HS4	1p35.3	4q34.3	6q14.3	6q26	12q12	12q24.33	14q22.1
