# Supplementary material for: Integrative analysis of DNA methylation and gene expression reveals distinct hepatocellular carcinoma subtypes with therapeutic implications
Source: Aging (Albany NY). 2020 Mar 22;12(6):4970–95. doi: 10.18632/aging.102923 (PMC7138576; doi:10.18632/aging.102923)
Supplement: Supplementary Table 8 [file aging-12-102923-s004..xlsx]

## Sheet: Table S8
Information of 2835 genes for machine learning
SYMBOL	ENTREZID	gene_id	gene_type
A1BG	1	ENSG00000121410	protein_coding
A4GNT	51146	ENSG00000118017	protein_coding
AASS	10157	ENSG00000008311	protein_coding
AATK	9625	ENSG00000181409	protein_coding
ABCA12	26154	ENSG00000144452	protein_coding
ABCA13	154664	ENSG00000179869	protein_coding
ABCA6	23460	ENSG00000154262	protein_coding
ABCA8	10351	ENSG00000141338	protein_coding
ABCB11	8647	ENSG00000073734	protein_coding
ABCB4	5244	ENSG00000005471	protein_coding
ABCB5	340273	ENSG00000004846	protein_coding
ABCC1	4363	ENSG00000103222	protein_coding
ABCC8	6833	ENSG00000006071	protein_coding
ABCC9	10060	ENSG00000069431	protein_coding
ABCG4	64137	ENSG00000172350	protein_coding
ABCG5	64240	ENSG00000138075	protein_coding
ABHD1	84696	ENSG00000143994	protein_coding
ABHD12B	145447	ENSG00000131969	protein_coding
ABHD14B	84836	ENSG00000114779	protein_coding
ABR	29	ENSG00000159842	protein_coding
ABRA	137735	ENSG00000174429	protein_coding
ACAA1	30	ENSG00000060971	protein_coding
ACCSL	390110	ENSG00000205126	protein_coding
ACE2	59272	ENSG00000130234	protein_coding
ACER1	125981	ENSG00000167769	protein_coding
ACKR4	51554	ENSG00000129048	protein_coding
ACOT1	641371	ENSG00000184227	protein_coding
ACOT11	26027	ENSG00000162390	protein_coding
ACOT12	134526	ENSG00000172497	protein_coding
ACOT4	122970	ENSG00000177465	protein_coding
ACOT6	641372	ENSG00000205669	protein_coding
ACOX2	8309	ENSG00000168306	protein_coding
ACPP	55	ENSG00000014257	protein_coding
ACRV1	56	ENSG00000134940	protein_coding
ACSBG1	23205	ENSG00000103740	protein_coding
ACSM2A	123876	ENSG00000183747	protein_coding
ACSM2B	348158	ENSG00000066813	protein_coding
ACSM4	341392	ENSG00000215009	protein_coding
ACSS2	55902	ENSG00000131069	protein_coding
ACTBL2	345651	ENSG00000169067	protein_coding
ACTL8	81569	ENSG00000117148	protein_coding
ACTN2	88	ENSG00000077522	protein_coding
ACY3	91703	ENSG00000132744	protein_coding
ADAD1	132612	ENSG00000164113	protein_coding
ADAM12	8038	ENSG00000148848	protein_coding
ADAM23	8745	ENSG00000114948	protein_coding
ADAM28	10863	ENSG00000042980	protein_coding
ADAM33	80332	ENSG00000149451	protein_coding
ADAM9	8754	ENSG00000168615	protein_coding
ADAMDEC1	27299	ENSG00000134028	protein_coding
ADAMTS12	81792	ENSG00000151388	protein_coding
ADAMTS14	140766	ENSG00000138316	protein_coding
ADAMTS15	170689	ENSG00000166106	protein_coding
ADAMTS16	170690	ENSG00000145536	protein_coding
ADAMTS20	80070	ENSG00000173157	protein_coding
ADAMTS9	56999	ENSG00000163638	protein_coding
ADAP1	11033	ENSG00000105963	protein_coding
ADCY2	108	ENSG00000078295	protein_coding
ADCY3	109	ENSG00000138031	protein_coding
ADCY7	113	ENSG00000121281	protein_coding
ADCY8	114	ENSG00000155897	protein_coding
ADD2	119	ENSG00000075340	protein_coding
ADGB	79747	ENSG00000118492	protein_coding
ADH1A	124	ENSG00000187758	protein_coding
ADH1B	125	ENSG00000196616	protein_coding
ADH6	130	ENSG00000172955	protein_coding
ADH7	131	ENSG00000196344	protein_coding
ADI1	55256	ENSG00000182551	protein_coding
ADIPOQ	9370	ENSG00000181092	protein_coding
ADORA1	134	ENSG00000163485	protein_coding
ADORA2A	135	ENSG00000128271	protein_coding
ADORA2B	136	ENSG00000170425	protein_coding
ADRA1D	146	ENSG00000171873	protein_coding
ADRA2A	150	ENSG00000150594	protein_coding
ADRB3	155	ENSG00000188778	protein_coding
AEBP1	165	ENSG00000106624	protein_coding
AFAP1	60312	ENSG00000196526	protein_coding
AFAP1L2	84632	ENSG00000169129	protein_coding
AFF2	2334	ENSG00000155966	protein_coding
AFM	173	ENSG00000079557	protein_coding
AFP	174	ENSG00000081051	protein_coding
AGBL4	84871	ENSG00000186094	protein_coding
AGR2	10551	ENSG00000106541	protein_coding
AGR3	155465	ENSG00000173467	protein_coding
AGTR2	186	ENSG00000180772	protein_coding
AGXT	189	ENSG00000172482	protein_coding
AHNAK2	113146	ENSG00000185567	protein_coding
AHSG	197	ENSG00000145192	protein_coding
AICDA	57379	ENSG00000111732	protein_coding
AIF1L	83543	ENSG00000126878	protein_coding
AIG1	51390	ENSG00000146416	protein_coding
AIM2	9447	ENSG00000163568	protein_coding
AIRE	326	ENSG00000160224	protein_coding
AJAP1	55966	ENSG00000196581	protein_coding
AK5	26289	ENSG00000154027	protein_coding
AKR1B1	231	ENSG00000085662	protein_coding
AKR7A3	22977	ENSG00000162482	protein_coding
ALAS2	212	ENSG00000158578	protein_coding
ALB	213	ENSG00000163631	protein_coding
ALDH1L2	160428	ENSG00000136010	protein_coding
ALDH2	217	ENSG00000111275	protein_coding
ALDH3A1	218	ENSG00000108602	protein_coding
ALDH3B2	222	ENSG00000132746	protein_coding
ALDH5A1	7915	ENSG00000112294	protein_coding
ALDH6A1	4329	ENSG00000119711	protein_coding
ALDH7A1	501	ENSG00000164904	protein_coding
ALDOB	229	ENSG00000136872	protein_coding
ALOX12B	242	ENSG00000179477	protein_coding
ALOX15B	247	ENSG00000179593	protein_coding
ALOX5	240	ENSG00000012779	protein_coding
ALOX5AP	241	ENSG00000132965	protein_coding
ALOXE3	59344	ENSG00000179148	protein_coding
ALPI	248	ENSG00000163295	protein_coding
ALX1	8092	ENSG00000180318	protein_coding
ALX4	60529	ENSG00000052850	protein_coding
AMBN	258	ENSG00000178522	protein_coding
AMBP	259	ENSG00000106927	protein_coding
AMDHD1	144193	ENSG00000139344	protein_coding
AMER3	205147	ENSG00000178171	protein_coding
AMH	268	ENSG00000104899	protein_coding
AMN	81693	ENSG00000166126	protein_coding
AMPD3	272	ENSG00000133805	protein_coding
AMPH	273	ENSG00000078053	protein_coding
AMT	275	ENSG00000145020	protein_coding
AMTN	401138	ENSG00000187689	protein_coding
ANG	283	ENSG00000214274	protein_coding
ANGPT4	51378	ENSG00000101280	protein_coding
ANGPTL3	27329	ENSG00000132855	protein_coding
ANGPTL7	10218	ENSG00000171819	protein_coding
ANK1	286	ENSG00000029534	protein_coding
ANK2	287	ENSG00000145362	protein_coding
ANK3	288	ENSG00000151150	protein_coding
ANKDD1B	728780	ENSG00000189045	protein_coding
ANKFN1	162282	ENSG00000153930	protein_coding
ANKRD1	27063	ENSG00000148677	protein_coding
ANKRD18B	441459	ENSG00000230453	protein_coding
ANKRD2	26287	ENSG00000165887	protein_coding
ANKRD30A	91074	ENSG00000148513	protein_coding
ANKRD33	341405	ENSG00000167612	protein_coding
ANKRD33B	651746	ENSG00000164236	protein_coding
ANKRD34B	340120	ENSG00000189127	protein_coding
ANKRD34C	390616	ENSG00000235711	protein_coding
ANLN	54443	ENSG00000011426	protein_coding
ANO3	63982	ENSG00000134343	protein_coding
ANO4	121601	ENSG00000151572	protein_coding
ANO9	338440	ENSG00000185101	protein_coding
ANTXR1	84168	ENSG00000169604	protein_coding
ANXA1	301	ENSG00000135046	protein_coding
ANXA13	312	ENSG00000104537	protein_coding
ANXA3	306	ENSG00000138772	protein_coding
ANXA8	653145	ENSG00000265190	protein_coding
ANXA8L1	728113	ENSG00000264230	protein_coding
AOX1	316	ENSG00000138356	protein_coding
AP1M2	10053	ENSG00000129354	protein_coding
AP1S3	130340	ENSG00000152056	protein_coding
AP3B2	8120	ENSG00000103723	protein_coding
APCDD1L	164284	ENSG00000198768	protein_coding
APLP1	333	ENSG00000105290	protein_coding
APOA1	335	ENSG00000118137	protein_coding
APOA2	336	ENSG00000158874	protein_coding
APOA4	337	ENSG00000110244	protein_coding
APOA5	116519	ENSG00000110243	protein_coding
APOB	338	ENSG00000084674	protein_coding
APOBEC3C	27350	ENSG00000244509	protein_coding
APOC1	341	ENSG00000130208	protein_coding
APOC2	344	ENSG00000234906	protein_coding
APOC3	345	ENSG00000110245	protein_coding
APOC4	346	ENSG00000267467	protein_coding
APOF	319	ENSG00000175336	protein_coding
APOH	350	ENSG00000091583	protein_coding
APOL5	80831	ENSG00000128313	protein_coding
APOM	55937	ENSG00000204444	protein_coding
AQP1	358	ENSG00000240583	protein_coding
AQP10	89872	ENSG00000143595	protein_coding
AQP11	282679	ENSG00000178301	protein_coding
AQP6	363	ENSG00000086159	protein_coding
ARC	23237	ENSG00000198576	protein_coding
AREG	374	ENSG00000109321	protein_coding
ARG2	384	ENSG00000081181	protein_coding
ARHGAP22	58504	ENSG00000128805	protein_coding
ARHGAP28	79822	ENSG00000088756	protein_coding
ARHGAP40	343578	ENSG00000124143	protein_coding
ARHGAP8	23779	ENSG00000241484	protein_coding
ARHGDIG	398	ENSG00000242173	protein_coding
ARHGEF10	9639	ENSG00000104728	protein_coding
ARHGEF25	115557	ENSG00000240771	protein_coding
ARHGEF38	54848	ENSG00000236699	protein_coding
ARHGEF4	50649	ENSG00000136002	protein_coding
ARID3C	138715	ENSG00000205143	protein_coding
ARL14	80117	ENSG00000179674	protein_coding
ARL4C	10123	ENSG00000188042	protein_coding
ARL4D	379	ENSG00000175906	protein_coding
ARL9	132946	ENSG00000196503	protein_coding
ARMC3	219681	ENSG00000165309	protein_coding
ARMC9	80210	ENSG00000135931	protein_coding
ARMCX1	51309	ENSG00000126947	protein_coding
ARMCX2	9823	ENSG00000184867	protein_coding
ARNT2	9915	ENSG00000172379	protein_coding
ARNTL2	56938	ENSG00000029153	protein_coding
ARPP21	10777	ENSG00000172995	protein_coding
ARSF	416	ENSG00000062096	protein_coding
ARSI	340075	ENSG00000183876	protein_coding
ARSJ	79642	ENSG00000180801	protein_coding
ART5	116969	ENSG00000167311	protein_coding
ARX	170302	ENSG00000004848	protein_coding
ASAH1	427	ENSG00000104763	protein_coding
ASAH2	56624	ENSG00000188611	protein_coding
ASB11	140456	ENSG00000165192	protein_coding
ASB15	142685	ENSG00000146809	protein_coding
ASB5	140458	ENSG00000164122	protein_coding
ASCL5	647219	ENSG00000232237	protein_coding
ASGR1	432	ENSG00000141505	protein_coding
ASGR2	433	ENSG00000161944	protein_coding
ASIC1	41	ENSG00000110881	protein_coding
ASPDH	554235	ENSG00000204653	protein_coding
ASZ1	136991	ENSG00000154438	protein_coding
ATCAY	85300	ENSG00000167654	protein_coding
ATF5	22809	ENSG00000169136	protein_coding
ATF7IP2	80063	ENSG00000166669	protein_coding
ATOH1	474	ENSG00000172238	protein_coding
ATOX1	475	ENSG00000177556	protein_coding
ATP10A	57194	ENSG00000206190	protein_coding
ATP13A4	84239	ENSG00000127249	protein_coding
ATP1A3	478	ENSG00000105409	protein_coding
ATP1A4	480	ENSG00000132681	protein_coding
ATP2B2	491	ENSG00000157087	protein_coding
ATP2B3	492	ENSG00000067842	protein_coding
ATP2C2	9914	ENSG00000064270	protein_coding
ATP4B	496	ENSG00000186009	protein_coding
ATP6V0A4	50617	ENSG00000105929	protein_coding
ATP6V0D2	245972	ENSG00000147614	protein_coding
ATP6V1B1	525	ENSG00000116039	protein_coding
ATP8A2	51761	ENSG00000132932	protein_coding
AURKB	9212	ENSG00000178999	protein_coding
AVIL	10677	ENSG00000135407	protein_coding
AXDND1	126859	ENSG00000162779	protein_coding
AXIN2	8313	ENSG00000168646	protein_coding
AZGP1	563	ENSG00000160862	protein_coding
AZU1	566	ENSG00000172232	protein_coding
B3GALT2	8707	ENSG00000162630	protein_coding
B3GALT5	10317	ENSG00000183778	protein_coding
B3GAT1	27087	ENSG00000109956	protein_coding
B3GNT3	10331	ENSG00000179913	protein_coding
B3GNT6	192134	ENSG00000198488	protein_coding
B3GNT7	93010	ENSG00000156966	protein_coding
B3GNT8	374907	ENSG00000177191	protein_coding
B3GNT9	84752	ENSG00000237172	protein_coding
B4GALNT3	283358	ENSG00000139044	protein_coding
B4GALNT4	338707	ENSG00000182272	protein_coding
BAAT	570	ENSG00000136881	protein_coding
BACE2	25825	ENSG00000182240	protein_coding
BANK1	55024	ENSG00000153064	protein_coding
BARX1	56033	ENSG00000131668	protein_coding
BARX2	8538	ENSG00000043039	protein_coding
BASP1	10409	ENSG00000176788	protein_coding
BCAS1	8537	ENSG00000064787	protein_coding
BCAS4	55653	ENSG00000124243	protein_coding
BCAT1	586	ENSG00000060982	protein_coding
BCL11A	53335	ENSG00000119866	protein_coding
BCL2L10	10017	ENSG00000137875	protein_coding
BCL2L14	79370	ENSG00000121380	protein_coding
BCL2L15	440603	ENSG00000188761	protein_coding
BCO2	83875	ENSG00000197580	protein_coding
BDH1	622	ENSG00000161267	protein_coding
BDKRB1	623	ENSG00000100739	protein_coding
BDKRB2	624	ENSG00000168398	protein_coding
BDNF	627	ENSG00000176697	protein_coding
BEND4	389206	ENSG00000188848	protein_coding
BEND6	221336	ENSG00000151917	protein_coding
BEST3	144453	ENSG00000127325	protein_coding
BFSP2	8419	ENSG00000170819	protein_coding
BHLHE22	27319	ENSG00000180828	protein_coding
BHLHE41	79365	ENSG00000123095	protein_coding
BHMT	635	ENSG00000145692	protein_coding
BICC1	80114	ENSG00000122870	protein_coding
BICD1	636	ENSG00000151746	protein_coding
BIRC3	330	ENSG00000023445	protein_coding
BIRC7	79444	ENSG00000101197	protein_coding
BMP5	653	ENSG00000112175	protein_coding
BMP7	655	ENSG00000101144	protein_coding
BMPER	168667	ENSG00000164619	protein_coding
BMPR1B	658	ENSG00000138696	protein_coding
BNC1	646	ENSG00000169594	protein_coding
BNC2	54796	ENSG00000173068	protein_coding
BOK	666	ENSG00000176720	protein_coding
BOP1	23246	ENSG00000261236	protein_coding
BPHL	670	ENSG00000137274	protein_coding
BPI	671	ENSG00000101425	protein_coding
BPIFA1	51297	ENSG00000198183	protein_coding
BPIFA2	140683	ENSG00000131050	protein_coding
BPIFB1	92747	ENSG00000125999	protein_coding
BRDT	676	ENSG00000137948	protein_coding
BRINP1	1620	ENSG00000078725	protein_coding
BRS3	680	ENSG00000102239	protein_coding
BSN	8927	ENSG00000164061	protein_coding
BSND	7809	ENSG00000162399	protein_coding
C10orf82	143379	ENSG00000165863	protein_coding
C10orf99	387695	ENSG00000188373	protein_coding
C11orf53	341032	ENSG00000150750	protein_coding
C11orf86	254439	ENSG00000173237	protein_coding
C11orf88	399949	ENSG00000183644	protein_coding
C11orf91	100131378	ENSG00000205177	protein_coding
C12orf75	387882	ENSG00000235162	protein_coding
C14orf180	400258	ENSG00000184601	protein_coding
C14orf39	317761	ENSG00000179008	protein_coding
C16orf74	404550	ENSG00000154102	protein_coding
C16orf89	146556	ENSG00000153446	protein_coding
C19orf33	64073	ENSG00000167644	protein_coding
C1orf116	79098	ENSG00000182795	protein_coding
C1orf127	148345	ENSG00000175262	protein_coding
C1orf141	400757	ENSG00000203963	protein_coding
C1orf94	84970	ENSG00000142698	protein_coding
C1QL4	338761	ENSG00000186897	protein_coding
C1QTNF1	114897	ENSG00000173918	protein_coding
C1QTNF3	114899	ENSG00000082196	protein_coding
C1QTNF9B	387911	ENSG00000205863	protein_coding
C2	717	ENSG00000166278	protein_coding
C2CD2	25966	ENSG00000157617	protein_coding
C2CD4A	145741	ENSG00000198535	protein_coding
C2CD4B	388125	ENSG00000205502	protein_coding
C2CD4C	126567	ENSG00000183186	protein_coding
C2orf15	150590	ENSG00000241962	protein_coding
C2orf50	130813	ENSG00000150873	protein_coding
C2orf70	339778	ENSG00000173557	protein_coding
C3orf52	79669	ENSG00000114529	protein_coding
C4BPA	722	ENSG00000123838	protein_coding
C4BPB	725	ENSG00000123843	protein_coding
C5orf30	90355	ENSG00000181751	protein_coding
C5orf38	153571	ENSG00000186493	protein_coding
C6orf132	647024	ENSG00000188112	protein_coding
C6orf141	135398	ENSG00000197261	protein_coding
C6orf15	29113	ENSG00000204542	protein_coding
C6orf223	221416	ENSG00000181577	protein_coding
C7orf61	402573	ENSG00000185955	protein_coding
C8orf34	116328	ENSG00000165084	protein_coding
C9	735	ENSG00000113600	protein_coding
C9orf57	138240	ENSG00000204669	protein_coding
C9orf84	158401	ENSG00000165181	protein_coding
C9orf92	100129385	ENSG00000205549	protein_coding
CA1	759	ENSG00000133742	protein_coding
CA12	771	ENSG00000074410	protein_coding
CA14	23632	ENSG00000118298	protein_coding
CA3	761	ENSG00000164879	protein_coding
CA4	762	ENSG00000167434	protein_coding
CA5A	763	ENSG00000174990	protein_coding
CA9	768	ENSG00000107159	protein_coding
CABP4	57010	ENSG00000175544	protein_coding
CABYR	26256	ENSG00000154040	protein_coding
CACNA1B	774	ENSG00000148408	protein_coding
CACNA1E	777	ENSG00000198216	protein_coding
CACNA1G	8913	ENSG00000006283	protein_coding
CACNA1I	8911	ENSG00000100346	protein_coding
CACNA2D3	55799	ENSG00000157445	protein_coding
CACNB1	782	ENSG00000067191	protein_coding
CACNB3	784	ENSG00000167535	protein_coding
CACNG7	59284	ENSG00000105605	protein_coding
CACNG8	59283	ENSG00000142408	protein_coding
CADM2	253559	ENSG00000175161	protein_coding
CADM3	57863	ENSG00000162706	protein_coding
CADPS	8618	ENSG00000163618	protein_coding
CALB1	793	ENSG00000104327	protein_coding
CALB2	794	ENSG00000172137	protein_coding
CALCA	796	ENSG00000110680	protein_coding
CALCR	799	ENSG00000004948	protein_coding
CALHM1	255022	ENSG00000185933	protein_coding
CALHM3	119395	ENSG00000183128	protein_coding
CALR3	125972	ENSG00000269058	protein_coding
CALY	50632	ENSG00000130643	protein_coding
CAMKK1	84254	ENSG00000004660	protein_coding
CAPN6	827	ENSG00000077274	protein_coding
CAPN9	10753	ENSG00000135773	protein_coding
CARD11	84433	ENSG00000198286	protein_coding
CARD14	79092	ENSG00000141527	protein_coding
CASQ1	844	ENSG00000143318	protein_coding
CASR	846	ENSG00000036828	protein_coding
CATSPERB	79820	ENSG00000133962	protein_coding
CBLN1	869	ENSG00000102924	protein_coding
CBLN2	147381	ENSG00000141668	protein_coding
CBLN4	140689	ENSG00000054803	protein_coding
CCBE1	147372	ENSG00000183287	protein_coding
CCDC102B	79839	ENSG00000150636	protein_coding
CCDC13	152206	ENSG00000244607	protein_coding
CCDC136	64753	ENSG00000128596	protein_coding
CCDC141	285025	ENSG00000163492	protein_coding
CCDC160	347475	ENSG00000203952	protein_coding
CCDC169	728591	ENSG00000242715	protein_coding
CCDC170	80129	ENSG00000120262	protein_coding
CCDC172	374355	ENSG00000182645	protein_coding
CCDC177	56936	ENSG00000267909	protein_coding
CCDC178	374864	ENSG00000166960	protein_coding
CCDC33	80125	ENSG00000140481	protein_coding
CCDC38	120935	ENSG00000165972	protein_coding
CCDC60	160777	ENSG00000183273	protein_coding
CCDC74A	90557	ENSG00000163040	protein_coding
CCDC74B	91409	ENSG00000152076	protein_coding
CCDC78	124093	ENSG00000162004	protein_coding
CCDC8	83987	ENSG00000169515	protein_coding
CCDC89	220388	ENSG00000179071	protein_coding
CCIN	881	ENSG00000185972	protein_coding
CCKBR	887	ENSG00000110148	protein_coding
CCL15	6359	ENSG00000275718	protein_coding
CCL16	6360	ENSG00000275152	protein_coding
CCL2	6347	ENSG00000108691	protein_coding
CCL25	6370	ENSG00000131142	protein_coding
CCL26	10344	ENSG00000006606	protein_coding
CCL28	56477	ENSG00000151882	protein_coding
CCL7	6354	ENSG00000108688	protein_coding
CCNA1	8900	ENSG00000133101	protein_coding
CCND2	894	ENSG00000118971	protein_coding
CCNE1	898	ENSG00000105173	protein_coding
CCNI2	645121	ENSG00000205089	protein_coding
CCR3	1232	ENSG00000183625	protein_coding
CCR8	1237	ENSG00000179934	protein_coding
CCR9	10803	ENSG00000173585	protein_coding
CCS	9973	ENSG00000173992	protein_coding
CCSER1	401145	ENSG00000184305	protein_coding
CD14	929	ENSG00000170458	protein_coding
CD164L2	388611	ENSG00000174950	protein_coding
CD177	57126	ENSG00000204936	protein_coding
CD1A	909	ENSG00000158477	protein_coding
CD207	50489	ENSG00000116031	protein_coding
CD22	933	ENSG00000012124	protein_coding
CD24	100133941	ENSG00000272398	protein_coding
CD248	57124	ENSG00000174807	protein_coding
CD300LG	146894	ENSG00000161649	protein_coding
CD3D	915	ENSG00000167286	protein_coding
CD44	960	ENSG00000026508	protein_coding
CD7	924	ENSG00000173762	protein_coding
CD70	970	ENSG00000125726	protein_coding
CD80	941	ENSG00000121594	protein_coding
CDC14B	8555	ENSG00000081377	protein_coding
CDCA7	83879	ENSG00000144354	protein_coding
CDCP1	64866	ENSG00000163814	protein_coding
CDH11	1009	ENSG00000140937	protein_coding
CDH12	1010	ENSG00000154162	protein_coding
CDH17	1015	ENSG00000079112	protein_coding
CDH18	1016	ENSG00000145526	protein_coding
CDH3	1001	ENSG00000062038	protein_coding
CDH6	1004	ENSG00000113361	protein_coding
CDH7	1005	ENSG00000081138	protein_coding
CDHR1	92211	ENSG00000148600	protein_coding
CDHR4	389118	ENSG00000187492	protein_coding
CDHR5	53841	ENSG00000099834	protein_coding
CDK15	65061	ENSG00000138395	protein_coding
CDKL1	8814	ENSG00000100490	protein_coding
CDO1	1036	ENSG00000129596	protein_coding
CDR2L	30850	ENSG00000109089	protein_coding
CDRT1	374286	ENSG00000241322	protein_coding
CDRT15L2	256223	ENSG00000214819	protein_coding
CDX2	1045	ENSG00000165556	protein_coding
CEACAM20	125931	ENSG00000273777	protein_coding
CEACAM6	4680	ENSG00000086548	protein_coding
CEACAM7	1087	ENSG00000007306	protein_coding
CECR2	27443	ENSG00000099954	protein_coding
CELA3A	10136	ENSG00000142789	protein_coding
CELF2	10659	ENSG00000048740	protein_coding
CELF4	56853	ENSG00000101489	protein_coding
CEMIP	57214	ENSG00000103888	protein_coding
CEND1	51286	ENSG00000184524	protein_coding
CENPM	79019	ENSG00000100162	protein_coding
CEP55	55165	ENSG00000138180	protein_coding
CERCAM	51148	ENSG00000167123	protein_coding
CERS1	10715	ENSG00000223802	protein_coding
CERS4	79603	ENSG00000090661	protein_coding
CES3	23491	ENSG00000172828	protein_coding
CES4A	283848	ENSG00000172824	protein_coding
CFAP221	200373	ENSG00000163075	protein_coding
CFAP45	25790	ENSG00000213085	protein_coding
CFAP46	54777	ENSG00000171811	protein_coding
CFAP61	26074	ENSG00000089101	protein_coding
CFAP74	85452	ENSG00000142609	protein_coding
CFB	629	ENSG00000243649	protein_coding
CFHR1	3078	ENSG00000244414	protein_coding
CFHR2	3080	ENSG00000276911	protein_coding
CFHR3	10878	ENSG00000116785	protein_coding
CFHR4	10877	ENSG00000134365	protein_coding
CFHR5	81494	ENSG00000134389	protein_coding
CFTR	1080	ENSG00000001626	protein_coding
CGB7	94027	ENSG00000196337	protein_coding
CHAD	1101	ENSG00000136457	protein_coding
CHD5	26038	ENSG00000116254	protein_coding
CHGA	1113	ENSG00000100604	protein_coding
CHGB	1114	ENSG00000089199	protein_coding
CHI3L2	1117	ENSG00000064886	protein_coding
CHN1	1123	ENSG00000128656	protein_coding
CHN2	1124	ENSG00000106069	protein_coding
CHODL	140578	ENSG00000154645	protein_coding
CHRDL1	91851	ENSG00000101938	protein_coding
CHRM4	1132	ENSG00000180720	protein_coding
CHRNA1	1134	ENSG00000138435	protein_coding
CHRNA3	1136	ENSG00000080644	protein_coding
CHRNA4	1137	ENSG00000101204	protein_coding
CHRNA5	1138	ENSG00000169684	protein_coding
CHRNA6	8973	ENSG00000147434	protein_coding
CHRNA7	1139	ENSG00000175344	protein_coding
CHRNB3	1142	ENSG00000147432	protein_coding
CHRND	1144	ENSG00000135902	protein_coding
CHST1	8534	ENSG00000175264	protein_coding
CHST11	50515	ENSG00000171310	protein_coding
CHST2	9435	ENSG00000175040	protein_coding
CHST3	9469	ENSG00000122863	protein_coding
CHST4	10164	ENSG00000140835	protein_coding
CHST8	64377	ENSG00000124302	protein_coding
CIB3	117286	ENSG00000141977	protein_coding
CIDEA	1149	ENSG00000176194	protein_coding
CILP	8483	ENSG00000138615	protein_coding
CILP2	148113	ENSG00000160161	protein_coding
CITED1	4435	ENSG00000125931	protein_coding
CKM	1158	ENSG00000104879	protein_coding
CKMT1A	548596	ENSG00000223572	protein_coding
CKMT1B	1159	ENSG00000237289	protein_coding
CKMT2	1160	ENSG00000131730	protein_coding
CLC	1178	ENSG00000105205	protein_coding
CLCA1	1179	ENSG00000016490	protein_coding
CLCA2	9635	ENSG00000137975	protein_coding
CLCF1	23529	ENSG00000175505	protein_coding
CLCNKB	1188	ENSG00000184908	protein_coding
CLDN10	9071	ENSG00000134873	protein_coding
CLDN11	5010	ENSG00000013297	protein_coding
CLDN14	23562	ENSG00000159261	protein_coding
CLDN15	24146	ENSG00000106404	protein_coding
CLDN18	51208	ENSG00000066405	protein_coding
CLDN2	9075	ENSG00000165376	protein_coding
CLDN4	1364	ENSG00000189143	protein_coding
CLDN6	9074	ENSG00000184697	protein_coding
CLEC11A	6320	ENSG00000105472	protein_coding
CLEC17A	388512	ENSG00000187912	protein_coding
CLEC2L	154790	ENSG00000236279	protein_coding
CLEC3A	10143	ENSG00000166509	protein_coding
CLEC5A	23601	ENSG00000258227	protein_coding
CLEC7A	64581	ENSG00000172243	protein_coding
CLIC3	9022	ENSG00000169583	protein_coding
CLIC6	54102	ENSG00000159212	protein_coding
CLIP2	7461	ENSG00000106665	protein_coding
CLIP3	25999	ENSG00000105270	protein_coding
CLLU1	574028	ENSG00000257127	protein_coding
CLLU1OS	574016	ENSG00000205057	protein_coding
CLMP	79827	ENSG00000166250	protein_coding
CLPS	1208	ENSG00000137392	protein_coding
CLPSL1	340204	ENSG00000204140	protein_coding
CLPSL2	389383	ENSG00000196748	protein_coding
CLRN2	645104	ENSG00000249581	protein_coding
CLSPN	63967	ENSG00000092853	protein_coding
CLSTN2	64084	ENSG00000158258	protein_coding
CMA1	1215	ENSG00000092009	protein_coding
CMTM1	113540	ENSG00000089505	protein_coding
CMTM4	146223	ENSG00000183723	protein_coding
CNDP1	84735	ENSG00000150656	protein_coding
CNGA1	1259	ENSG00000198515	protein_coding
CNGB1	1258	ENSG00000070729	protein_coding
CNKSR1	10256	ENSG00000142675	protein_coding
CNTN1	1272	ENSG00000018236	protein_coding
CNTN2	6900	ENSG00000184144	protein_coding
CNTN3	5067	ENSG00000113805	protein_coding
CNTNAP3	79937	ENSG00000106714	protein_coding
CNTNAP5	129684	ENSG00000155052	protein_coding
COL10A1	1300	ENSG00000123500	protein_coding
COL11A1	1301	ENSG00000060718	protein_coding
COL11A2	1302	ENSG00000204248	protein_coding
COL13A1	1305	ENSG00000197467	protein_coding
COL16A1	1307	ENSG00000084636	protein_coding
COL17A1	1308	ENSG00000065618	protein_coding
COL1A1	1277	ENSG00000108821	protein_coding
COL1A2	1278	ENSG00000164692	protein_coding
COL24A1	255631	ENSG00000171502	protein_coding
COL26A1	136227	ENSG00000160963	protein_coding
COL28A1	340267	ENSG00000215018	protein_coding
COL3A1	1281	ENSG00000168542	protein_coding
COL4A6	1288	ENSG00000197565	protein_coding
COL5A1	1289	ENSG00000130635	protein_coding
COL6A2	1292	ENSG00000142173	protein_coding
COL6A3	1293	ENSG00000163359	protein_coding
COL6A6	131873	ENSG00000206384	protein_coding
COL8A2	1296	ENSG00000171812	protein_coding
COL9A2	1298	ENSG00000049089	protein_coding
COL9A3	1299	ENSG00000092758	protein_coding
COLCA2	120376	ENSG00000214290	protein_coding
COLEC12	81035	ENSG00000158270	protein_coding
COLGALT2	23127	ENSG00000198756	protein_coding
COMP	1311	ENSG00000105664	protein_coding
COQ10A	93058	ENSG00000135469	protein_coding
COX6A2	1339	ENSG00000156885	protein_coding
COX6B2	125965	ENSG00000160471	protein_coding
COX7A1	1346	ENSG00000161281	protein_coding
CPA1	1357	ENSG00000091704	protein_coding
CPA2	1358	ENSG00000158516	protein_coding
CPA4	51200	ENSG00000128510	protein_coding
CPA6	57094	ENSG00000165078	protein_coding
CPB1	1360	ENSG00000153002	protein_coding
CPB2	1361	ENSG00000080618	protein_coding
CPEB1	64506	ENSG00000214575	protein_coding
CPLX2	10814	ENSG00000145920	protein_coding
CPLX4	339302	ENSG00000166569	protein_coding
CPN1	1369	ENSG00000120054	protein_coding
CPNE6	9362	ENSG00000100884	protein_coding
CPZ	8532	ENSG00000109625	protein_coding
CR2	1380	ENSG00000117322	protein_coding
CRABP1	1381	ENSG00000166426	protein_coding
CRABP2	1382	ENSG00000143320	protein_coding
CRACR2B	283229	ENSG00000177685	protein_coding
CRB2	286204	ENSG00000148204	protein_coding
CREB3L1	90993	ENSG00000157613	protein_coding
CREB5	9586	ENSG00000146592	protein_coding
CREG2	200407	ENSG00000175874	protein_coding
CRH	1392	ENSG00000147571	protein_coding
CRHR1	1394	ENSG00000120088	protein_coding
CRISP2	7180	ENSG00000124490	protein_coding
CRISP3	10321	ENSG00000096006	protein_coding
CRISPLD1	83690	ENSG00000121005	protein_coding
CRLF1	9244	ENSG00000006016	protein_coding
CRLF2	64109	ENSGR0000205755	protein_coding
CRNN	49860	ENSG00000143536	protein_coding
CRTAC1	55118	ENSG00000095713	protein_coding
CRYAA	1409	ENSG00000276076	protein_coding
CRYBA2	1412	ENSG00000163499	protein_coding
CRYBA4	1413	ENSG00000196431	protein_coding
CRYBB1	1414	ENSG00000100122	protein_coding
CRYGN	155051	ENSG00000127377	protein_coding
CRYGS	1427	ENSG00000213139	protein_coding
CRYL1	51084	ENSG00000165475	protein_coding
CSF1	1435	ENSG00000184371	protein_coding
CSF1R	1436	ENSG00000182578	protein_coding
CSF2RB	1439	ENSG00000100368	protein_coding
CSGALNACT1	55790	ENSG00000147408	protein_coding
CSMD1	64478	ENSG00000183117	protein_coding
CSN2	1447	ENSG00000135222	protein_coding
CSRP3	8048	ENSG00000129170	protein_coding
CST2	1470	ENSG00000170369	protein_coding
CST4	1472	ENSG00000101441	protein_coding
CST5	1473	ENSG00000170367	protein_coding
CST6	1474	ENSG00000175315	protein_coding
CT45A1	541466	ENSG00000268940	protein_coding
CT47B1	643311	ENSG00000236446	protein_coding
CT55	54967	ENSG00000169551	protein_coding
CT62	196993	ENSG00000225362	protein_coding
CTBP2	1488	ENSG00000175029	protein_coding
CTCFL	140690	ENSG00000124092	protein_coding
CTF1	1489	ENSG00000150281	protein_coding
CTH	1491	ENSG00000116761	protein_coding
CTNNA2	1496	ENSG00000066032	protein_coding
CTNND2	1501	ENSG00000169862	protein_coding
CTRB1	1504	ENSG00000168925	protein_coding
CTRB2	440387	ENSG00000168928	protein_coding
CTRC	11330	ENSG00000162438	protein_coding
CTSE	1510	ENSG00000196188	protein_coding
CTSG	1511	ENSG00000100448	protein_coding
CTSK	1513	ENSG00000143387	protein_coding
CTSV	1515	ENSG00000136943	protein_coding
CTTNBP2	83992	ENSG00000077063	protein_coding
CTTNBP2NL	55917	ENSG00000143079	protein_coding
CTXN1	404217	ENSG00000178531	protein_coding
CUZD1	50624	ENSG00000138161	protein_coding
CXCL1	2919	ENSG00000163739	protein_coding
CXCL13	10563	ENSG00000156234	protein_coding
CXCL14	9547	ENSG00000145824	protein_coding
CXCL17	284340	ENSG00000189377	protein_coding
CXCL3	2921	ENSG00000163734	protein_coding
CXCL5	6374	ENSG00000163735	protein_coding
CXCL6	6372	ENSG00000124875	protein_coding
CXCL8	3576	ENSG00000169429	protein_coding
CXCR5	643	ENSG00000160683	protein_coding
CXorf66	347487	ENSG00000203933	protein_coding
CYB5A	1528	ENSG00000166347	protein_coding
CYBB	1536	ENSG00000165168	protein_coding
CYP11B1	1584	ENSG00000160882	protein_coding
CYP11B2	1585	ENSG00000179142	protein_coding
CYP24A1	1591	ENSG00000019186	protein_coding
CYP26B1	56603	ENSG00000003137	protein_coding
CYP27A1	1593	ENSG00000135929	protein_coding
CYP2A13	1553	ENSG00000197838	protein_coding
CYP2A6	1548	ENSG00000255974	protein_coding
CYP2A7	1549	ENSG00000198077	protein_coding
CYP2B6	1555	ENSG00000197408	protein_coding
CYP2C8	1558	ENSG00000138115	protein_coding
CYP2C9	1559	ENSG00000138109	protein_coding
CYP2D6	1565	ENSG00000100197	protein_coding
CYP2E1	1571	ENSG00000130649	protein_coding
CYP2J2	1573	ENSG00000134716	protein_coding
CYP2W1	54905	ENSG00000073067	protein_coding
CYP3A4	1576	ENSG00000160868	protein_coding
CYP3A43	64816	ENSG00000021461	protein_coding
CYP3A5	1577	ENSG00000106258	protein_coding
CYP3A7	1551	ENSG00000160870	protein_coding
CYP4A11	1579	ENSG00000187048	protein_coding
CYP4A22	284541	ENSG00000162365	protein_coding
CYP4F12	66002	ENSG00000186204	protein_coding
CYP4F2	8529	ENSG00000186115	protein_coding
CYP7A1	1581	ENSG00000167910	protein_coding
CYP8B1	1582	ENSG00000180432	protein_coding
CYS1	192668	ENSG00000205795	protein_coding
DAAM2	23500	ENSG00000146122	protein_coding
DAB1	1600	ENSG00000173406	protein_coding
DAB2	1601	ENSG00000153071	protein_coding
DAO	1610	ENSG00000110887	protein_coding
DAPL1	92196	ENSG00000163331	protein_coding
DAW1	164781	ENSG00000123977	protein_coding
DBNDD2	55861	ENSG00000244274	protein_coding
DBX2	440097	ENSG00000185610	protein_coding
DCAF12L1	139170	ENSG00000198889	protein_coding
DCC	1630	ENSG00000187323	protein_coding
DCDC2	51473	ENSG00000146038	protein_coding
DCHS2	54798	ENSG00000197410	protein_coding
DCLK1	9201	ENSG00000133083	protein_coding
DCLK2	166614	ENSG00000170390	protein_coding
DCXR	51181	ENSG00000169738	protein_coding
DDR1	780	ENSG00000204580	protein_coding
DDT	1652	ENSG00000099977	protein_coding
DDTL	100037417	ENSG00000099974	protein_coding
DDX53	168400	ENSG00000184735	protein_coding
DEFA3	1668	ENSG00000239839	protein_coding
DEFA4	1669	ENSG00000164821	protein_coding
DEFA5	1670	ENSG00000164816	protein_coding
DEGS2	123099	ENSG00000168350	protein_coding
DEPDC1B	55789	ENSG00000035499	protein_coding
DES	1674	ENSG00000175084	protein_coding
DGAT2	84649	ENSG00000062282	protein_coding
DGKI	9162	ENSG00000157680	protein_coding
DGKK	139189	ENSG00000274588	protein_coding
DHRS1	115817	ENSG00000157379	protein_coding
DHRS12	79758	ENSG00000102796	protein_coding
DHRS2	10202	ENSG00000100867	protein_coding
DHRS4	10901	ENSG00000157326	protein_coding
DHRS4L2	317749	ENSG00000187630	protein_coding
DIO2	1734	ENSG00000211448	protein_coding
DIRAS1	148252	ENSG00000176490	protein_coding
DIRAS2	54769	ENSG00000165023	protein_coding
DIRC3	729582	ENSG00000231672	protein_coding
DKK1	22943	ENSG00000107984	protein_coding
DKK4	27121	ENSG00000104371	protein_coding
DLG3	1741	ENSG00000082458	protein_coding
DLGAP1	9229	ENSG00000170579	protein_coding
DLL3	10683	ENSG00000090932	protein_coding
DLX4	1748	ENSG00000108813	protein_coding
DLX5	1749	ENSG00000105880	protein_coding
DLX6	1750	ENSG00000006377	protein_coding
DMBT1	1755	ENSG00000187908	protein_coding
DMBX1	127343	ENSG00000197587	protein_coding
DMKN	93099	ENSG00000161249	protein_coding
DMP1	1758	ENSG00000152592	protein_coding
DMRT1	1761	ENSG00000137090	protein_coding
DMRT2	10655	ENSG00000173253	protein_coding
DMRTA2	63950	ENSG00000142700	protein_coding
DMRTB1	63948	ENSG00000143006	protein_coding
DNAH7	56171	ENSG00000118997	protein_coding
DNAJC5G	285126	ENSG00000163793	protein_coding
DNER	92737	ENSG00000187957	protein_coding
DNM1	1759	ENSG00000106976	protein_coding
DNMT3L	29947	ENSG00000142182	protein_coding
DOCK10	55619	ENSG00000135905	protein_coding
DPEP1	1800	ENSG00000015413	protein_coding
DPEP3	64180	ENSG00000141096	protein_coding
DPF1	8193	ENSG00000011332	protein_coding
DPP10	57628	ENSG00000175497	protein_coding
DPPA2	151871	ENSG00000163530	protein_coding
DPYS	1807	ENSG00000147647	protein_coding
DPYSL3	1809	ENSG00000113657	protein_coding
DPYSL4	10570	ENSG00000151640	protein_coding
DPYSL5	56896	ENSG00000157851	protein_coding
DQX1	165545	ENSG00000144045	protein_coding
DRAXIN	374946	ENSG00000162490	protein_coding
DRD1	1812	ENSG00000184845	protein_coding
DRD2	1813	ENSG00000149295	protein_coding
DRP2	1821	ENSG00000102385	protein_coding
DSC3	1825	ENSG00000134762	protein_coding
DSCAML1	57453	ENSG00000177103	protein_coding
DSEL	92126	ENSG00000171451	protein_coding
DSG1	1828	ENSG00000134760	protein_coding
DSG2	1829	ENSG00000046604	protein_coding
DUOX2	50506	ENSG00000140279	protein_coding
DUOXA1	90527	ENSG00000140254	protein_coding
DUOXA2	405753	ENSG00000140274	protein_coding
DUSP15	128853	ENSG00000149599	protein_coding
DUSP4	1846	ENSG00000120875	protein_coding
DUXA	503835	ENSG00000258873	protein_coding
DYNAP	284254	ENSG00000178690	protein_coding
DYNC1I1	1780	ENSG00000158560	protein_coding
DZIP1	22873	ENSG00000134874	protein_coding
EBP	10682	ENSG00000147155	protein_coding
ECEL1	9427	ENSG00000171551	protein_coding
ECHS1	1892	ENSG00000127884	protein_coding
ECI2	10455	ENSG00000198721	protein_coding
ECM2	1842	ENSG00000106823	protein_coding
ECT2	1894	ENSG00000114346	protein_coding
EDDM3B	64184	ENSG00000181552	protein_coding
EDN1	1906	ENSG00000078401	protein_coding
EDN2	1907	ENSG00000127129	protein_coding
EFHB	151651	ENSG00000163576	protein_coding
EFNA5	1946	ENSG00000184349	protein_coding
EFNB3	1949	ENSG00000108947	protein_coding
EFS	10278	ENSG00000100842	protein_coding
EGF	1950	ENSG00000138798	protein_coding
EGFL6	25975	ENSG00000198759	protein_coding
EGLN3	112399	ENSG00000129521	protein_coding
EGR4	1961	ENSG00000135625	protein_coding
EHF	26298	ENSG00000135373	protein_coding
ELF4	2000	ENSG00000102034	protein_coding
ELFN1	392617	ENSG00000225968	protein_coding
ELOVL2	54898	ENSG00000197977	protein_coding
ELOVL4	6785	ENSG00000118402	protein_coding
ELOVL7	79993	ENSG00000164181	protein_coding
EMB	133418	ENSG00000170571	protein_coding
EMILIN3	90187	ENSG00000183798	protein_coding
EMP3	2014	ENSG00000142227	protein_coding
EMX2	2018	ENSG00000170370	protein_coding
EN1	2019	ENSG00000163064	protein_coding
EN2	2020	ENSG00000164778	protein_coding
ENDOD1	23052	ENSG00000149218	protein_coding
ENHO	375704	ENSG00000168913	protein_coding
ENKUR	219670	ENSG00000151023	protein_coding
ENO2	2026	ENSG00000111674	protein_coding
ENO3	2027	ENSG00000108515	protein_coding
ENPP7	339221	ENSG00000182156	protein_coding
ENTHD1	150350	ENSG00000176177	protein_coding
ENTPD3	956	ENSG00000168032	protein_coding
ENTPD8	377841	ENSG00000188833	protein_coding
EPB41L3	23136	ENSG00000082397	protein_coding
EPB41L4A	64097	ENSG00000129595	protein_coding
EPCAM	4072	ENSG00000119888	protein_coding
EPGN	255324	ENSG00000182585	protein_coding
EPHA10	284656	ENSG00000183317	protein_coding
EPHA5	2044	ENSG00000145242	protein_coding
EPHA6	285220	ENSG00000080224	protein_coding
EPHA7	2045	ENSG00000135333	protein_coding
EPHA8	2046	ENSG00000070886	protein_coding
EPHB2	2048	ENSG00000133216	protein_coding
EPHB3	2049	ENSG00000182580	protein_coding
EPHB6	2051	ENSG00000106123	protein_coding
EPHX1	2052	ENSG00000143819	protein_coding
EPHX3	79852	ENSG00000105131	protein_coding
EPHX4	253152	ENSG00000172031	protein_coding
EPN3	55040	ENSG00000049283	protein_coding
EPPK1	83481	ENSG00000261150	protein_coding
EPS8L1	54869	ENSG00000131037	protein_coding
EPYC	1833	ENSG00000083782	protein_coding
ERBB4	2066	ENSG00000178568	protein_coding
EREG	2069	ENSG00000124882	protein_coding
ERICH4	100170765	ENSG00000204978	protein_coding
ERN2	10595	ENSG00000134398	protein_coding
ERP27	121506	ENSG00000139055	protein_coding
ERRFI1	54206	ENSG00000116285	protein_coding
ESPN	83715	ENSG00000187017	protein_coding
ESRP1	54845	ENSG00000104413	protein_coding
ESRRG	2104	ENSG00000196482	protein_coding
ETNK2	55224	ENSG00000143845	protein_coding
ETV4	2118	ENSG00000175832	protein_coding
EVPL	2125	ENSG00000167880	protein_coding
EVX1	2128	ENSG00000106038	protein_coding
EXOC3L4	91828	ENSG00000205436	protein_coding
EXPH5	23086	ENSG00000110723	protein_coding
EXTL1	2134	ENSG00000158008	protein_coding
EYA1	2138	ENSG00000104313	protein_coding
F10	2159	ENSG00000126218	protein_coding
F12	2161	ENSG00000131187	protein_coding
F13B	2165	ENSG00000143278	protein_coding
F2	2147	ENSG00000180210	protein_coding
F2RL2	2151	ENSG00000164220	protein_coding
F3	2152	ENSG00000117525	protein_coding
F7	2155	ENSG00000057593	protein_coding
F9	2158	ENSG00000101981	protein_coding
FA2H	79152	ENSG00000103089	protein_coding
FABP1	2168	ENSG00000163586	protein_coding
FABP3	2170	ENSG00000121769	protein_coding
FABP6	2172	ENSG00000170231	protein_coding
FABP7	2173	ENSG00000164434	protein_coding
FADS6	283985	ENSG00000172782	protein_coding
FAM102B	284611	ENSG00000162636	protein_coding
FAM117B	150864	ENSG00000138439	protein_coding
FAM124A	220108	ENSG00000150510	protein_coding
FAM129A	116496	ENSG00000135842	protein_coding
FAM129B	64855	ENSG00000136830	protein_coding
FAM153A	285596	ENSG00000170074	protein_coding
FAM153C	653316	ENSG00000204677	protein_coding
FAM155A	728215	ENSG00000204442	protein_coding
FAM160A1	729830	ENSG00000164142	protein_coding
FAM163A	148753	ENSG00000143340	protein_coding
FAM167A	83648	ENSG00000154319	protein_coding
FAM171B	165215	ENSG00000144369	protein_coding
FAM180B	399888	ENSG00000196666	protein_coding
FAM189A1	23359	ENSG00000104059	protein_coding
FAM19A4	151647	ENSG00000163377	protein_coding
FAM205A	259308	ENSG00000205108	protein_coding
FAM216B	144809	ENSG00000179813	protein_coding
FAM221B	392307	ENSG00000204930	protein_coding
FAM227A	646851	ENSG00000184949	protein_coding
FAM27C	100132948	ENSG00000154537	protein_coding
FAM3D	131177	ENSG00000198643	protein_coding
FAM81A	145773	ENSG00000157470	protein_coding
FAM81B	153643	ENSG00000153347	protein_coding
FAM83A	84985	ENSG00000147689	protein_coding
FAM83B	222584	ENSG00000168143	protein_coding
FAM83C	128876	ENSG00000125998	protein_coding
FAM83E	54854	ENSG00000105523	protein_coding
FAM83F	113828	ENSG00000133477	protein_coding
FAM90A1	55138	ENSG00000171847	protein_coding
FAM9A	171482	ENSG00000183304	protein_coding
FAM9C	171484	ENSG00000187268	protein_coding
FANK1	92565	ENSG00000203780	protein_coding
FAP	2191	ENSG00000078098	protein_coding
FAR1	84188	ENSG00000197601	protein_coding
FAXC	84553	ENSG00000146267	protein_coding
FAXDC2	10826	ENSG00000170271	protein_coding
FBLN2	2199	ENSG00000163520	protein_coding
FBN2	2201	ENSG00000138829	protein_coding
FBXL2	25827	ENSG00000153558	protein_coding
FBXO40	51725	ENSG00000163833	protein_coding
FBXO47	494188	ENSG00000204952	protein_coding
FBXW10	10517	ENSG00000171931	protein_coding
FCGBP	8857	ENSG00000275395	protein_coding
FCGR1A	2209	ENSG00000150337	protein_coding
FCGR2A	2212	ENSG00000143226	protein_coding
FCHO1	23149	ENSG00000130475	protein_coding
FCRL1	115350	ENSG00000163534	protein_coding
FCRLA	84824	ENSG00000132185	protein_coding
FDCSP	260436	ENSG00000181617	protein_coding
FER1L5	90342	ENSG00000249715	protein_coding
FERMT1	55612	ENSG00000101311	protein_coding
FETUB	26998	ENSG00000090512	protein_coding
FEZF2	55079	ENSG00000153266	protein_coding
FGF1	2246	ENSG00000113578	protein_coding
FGF14	2259	ENSG00000102466	protein_coding
FGF17	8822	ENSG00000158815	protein_coding
FGF19	9965	ENSG00000162344	protein_coding
FGF2	2247	ENSG00000138685	protein_coding
FGF21	26291	ENSG00000105550	protein_coding
FGF23	8074	ENSG00000118972	protein_coding
FGF3	2248	ENSG00000186895	protein_coding
FGF4	2249	ENSG00000075388	protein_coding
FGF5	2250	ENSG00000138675	protein_coding
FGF9	2254	ENSG00000102678	protein_coding
FGFBP1	9982	ENSG00000137440	protein_coding
FGFR1	2260	ENSG00000077782	protein_coding
FGFR3	2261	ENSG00000068078	protein_coding
FHDC1	85462	ENSG00000137460	protein_coding
FHOD3	80206	ENSG00000134775	protein_coding
FIBCD1	84929	ENSG00000130720	protein_coding
FIBIN	387758	ENSG00000176971	protein_coding
FITM1	161247	ENSG00000139914	protein_coding
FJX1	24147	ENSG00000179431	protein_coding
FKBP6	8468	ENSG00000077800	protein_coding
FLNA	2316	ENSG00000196924	protein_coding
FLNC	2318	ENSG00000128591	protein_coding
FLRT2	23768	ENSG00000185070	protein_coding
FMN1	342184	ENSG00000248905	protein_coding
FMN2	56776	ENSG00000155816	protein_coding
FMNL2	114793	ENSG00000157827	protein_coding
FMO5	2330	ENSG00000131781	protein_coding
FMR1NB	158521	ENSG00000176988	protein_coding
FNDC1	84624	ENSG00000164694	protein_coding
FNDC5	252995	ENSG00000160097	protein_coding
FOLH1	2346	ENSG00000086205	protein_coding
FOLR1	2348	ENSG00000110195	protein_coding
FOSL1	8061	ENSG00000175592	protein_coding
FOXA2	3170	ENSG00000125798	protein_coding
FOXC2	2303	ENSG00000176692	protein_coding
FOXD1	2297	ENSG00000251493	protein_coding
FOXD3	27022	ENSG00000187140	protein_coding
FOXF2	2295	ENSG00000137273	protein_coding
FOXG1	2290	ENSG00000176165	protein_coding
FOXH1	8928	ENSG00000160973	protein_coding
FOXI1	2299	ENSG00000168269	protein_coding
FOXI3	344167	ENSG00000214336	protein_coding
FOXL1	2300	ENSG00000176678	protein_coding
FOXL2	668	ENSG00000183770	protein_coding
FOXL2NB	401089	ENSG00000206262	protein_coding
FOXN1	8456	ENSG00000109101	protein_coding
FPR1	2357	ENSG00000171051	protein_coding
FRAS1	80144	ENSG00000138759	protein_coding
FREM1	158326	ENSG00000164946	protein_coding
FRG2	448831	ENSG00000205097	protein_coding
FRMD1	79981	ENSG00000153303	protein_coding
FRMD3	257019	ENSG00000172159	protein_coding
FRMD5	84978	ENSG00000171877	protein_coding
FRMD7	90167	ENSG00000165694	protein_coding
FRMPD2	143162	ENSG00000170324	protein_coding
FRMPD3	84443	ENSG00000147234	protein_coding
FRRS1L	23732	ENSG00000260230	protein_coding
FSCN1	6624	ENSG00000075618	protein_coding
FTCD	10841	ENSG00000160282	protein_coding
FUOM	282969	ENSG00000148803	protein_coding
FUT3	2525	ENSG00000171124	protein_coding
FUT4	2526	ENSG00000196371	protein_coding
FUT5	2527	ENSG00000130383	protein_coding
FUT7	2529	ENSG00000180549	protein_coding
FUT8	2530	ENSG00000033170	protein_coding
FXYD1	5348	ENSG00000266964	protein_coding
FXYD3	5349	ENSG00000089356	protein_coding
FZD1	8321	ENSG00000157240	protein_coding
FZD2	2535	ENSG00000180340	protein_coding
FZD7	8324	ENSG00000155760	protein_coding
FZD9	8326	ENSG00000188763	protein_coding
G6PC	2538	ENSG00000131482	protein_coding
GABBR1	2550	ENSG00000204681	protein_coding
GABBR2	9568	ENSG00000136928	protein_coding
GABRA4	2557	ENSG00000109158	protein_coding
GABRA5	2558	ENSG00000186297	protein_coding
GABRB2	2561	ENSG00000145864	protein_coding
GABRG3	2567	ENSG00000182256	protein_coding
GABRP	2568	ENSG00000094755	protein_coding
GAD2	2572	ENSG00000136750	protein_coding
GADL1	339896	ENSG00000144644	protein_coding
GAL3ST1	9514	ENSG00000128242	protein_coding
GAL3ST4	79690	ENSG00000197093	protein_coding
GALK1	2584	ENSG00000108479	protein_coding
GALNT12	79695	ENSG00000119514	protein_coding
GALNT14	79623	ENSG00000158089	protein_coding
GALNT3	2591	ENSG00000115339	protein_coding
GALNT5	11227	ENSG00000136542	protein_coding
GALNT7	51809	ENSG00000109586	protein_coding
GALNTL6	442117	ENSG00000174473	protein_coding
GALP	85569	ENSG00000197487	protein_coding
GALR1	2587	ENSG00000166573	protein_coding
GALR3	8484	ENSG00000128310	protein_coding
GAMT	2593	ENSG00000130005	protein_coding
GAP43	2596	ENSG00000172020	protein_coding
GAPT	202309	ENSG00000175857	protein_coding
GAS2L2	246176	ENSG00000270765	protein_coding
GATA3	2625	ENSG00000107485	protein_coding
GBGT1	26301	ENSG00000148288	protein_coding
GCAT	23464	ENSG00000100116	protein_coding
GCDH	2639	ENSG00000105607	protein_coding
GCG	2641	ENSG00000115263	protein_coding
GCGR	2642	ENSG00000215644	protein_coding
GCHFR	2644	ENSG00000137880	protein_coding
GCK	2645	ENSG00000106633	protein_coding
GCM1	8521	ENSG00000137270	protein_coding
GCNT1	2650	ENSG00000187210	protein_coding
GCNT3	9245	ENSG00000140297	protein_coding
GCSAM	257144	ENSG00000174500	protein_coding
GDAP1L1	78997	ENSG00000124194	protein_coding
GDF10	2662	ENSG00000266524	protein_coding
GDF6	392255	ENSG00000156466	protein_coding
GDF7	151449	ENSG00000143869	protein_coding
GDNF	2668	ENSG00000168621	protein_coding
GDPD3	79153	ENSG00000102886	protein_coding
GDPD4	220032	ENSG00000178795	protein_coding
GFAP	2670	ENSG00000131095	protein_coding
GFPT2	9945	ENSG00000131459	protein_coding
GFRA1	2674	ENSG00000151892	protein_coding
GFRA3	2676	ENSG00000146013	protein_coding
GGT6	124975	ENSG00000167741	protein_coding
GGTLC1	92086	ENSG00000149435	protein_coding
GH2	2689	ENSG00000136487	protein_coding
GIPR	2696	ENSG00000010310	protein_coding
GJA3	2700	ENSG00000121743	protein_coding
GJB3	2707	ENSG00000188910	protein_coding
GJB4	127534	ENSG00000189433	protein_coding
GJB5	2709	ENSG00000189280	protein_coding
GJB6	10804	ENSG00000121742	protein_coding
GJB7	375519	ENSG00000164411	protein_coding
GJC3	349149	ENSG00000176402	protein_coding
GLB1L2	89944	ENSG00000149328	protein_coding
GLI2	2736	ENSG00000074047	protein_coding
GLI3	2737	ENSG00000106571	protein_coding
GLIPR2	152007	ENSG00000122694	protein_coding
GLIS1	148979	ENSG00000174332	protein_coding
GLIS2	84662	ENSG00000126603	protein_coding
GLIS3	169792	ENSG00000107249	protein_coding
GLOD5	392465	ENSG00000171433	protein_coding
GLP1R	2740	ENSG00000112164	protein_coding
GLP2R	9340	ENSG00000065325	protein_coding
GLS	2744	ENSG00000115419	protein_coding
GLT1D1	144423	ENSG00000151948	protein_coding
GLTPD2	388323	ENSG00000182327	protein_coding
GLUD1	2746	ENSG00000148672	protein_coding
GLUL	2752	ENSG00000135821	protein_coding
GLYAT	10249	ENSG00000149124	protein_coding
GLYATL1	92292	ENSG00000166840	protein_coding
GLYATL2	219970	ENSG00000156689	protein_coding
GLYCTK	132158	ENSG00000168237	protein_coding
GML	2765	ENSG00000104499	protein_coding
GMNC	647309	ENSG00000205835	protein_coding
GNAT1	2779	ENSG00000114349	protein_coding
GNAZ	2781	ENSG00000128266	protein_coding
GNG8	94235	ENSG00000167414	protein_coding
GNMT	27232	ENSG00000124713	protein_coding
GOLGA6A	342096	ENSG00000159289	protein_coding
GOLGA6D	653643	ENSG00000140478	protein_coding
GOLGA7B	401647	ENSG00000155265	protein_coding
GOLM1	51280	ENSG00000135052	protein_coding
GPAM	57678	ENSG00000119927	protein_coding
GPBAR1	151306	ENSG00000179921	protein_coding
GPC2	221914	ENSG00000213420	protein_coding
GPC4	2239	ENSG00000076716	protein_coding
GPER1	2852	ENSG00000164850	protein_coding
GPLD1	2822	ENSG00000112293	protein_coding
GPM6B	2824	ENSG00000046653	protein_coding
GPNMB	10457	ENSG00000136235	protein_coding
GPR141	353345	ENSG00000187037	protein_coding
GPR161	23432	ENSG00000143147	protein_coding
GPR173	54328	ENSG00000184194	protein_coding
GPR174	84636	ENSG00000147138	protein_coding
GPR27	2850	ENSG00000170837	protein_coding
GPR31	2853	ENSG00000120436	protein_coding
GPR50	9248	ENSG00000102195	protein_coding
GPR63	81491	ENSG00000112218	protein_coding
GPR78	27201	ENSG00000155269	protein_coding
GPR82	27197	ENSG00000171657	protein_coding
GPR84	53831	ENSG00000139572	protein_coding
GPR87	53836	ENSG00000138271	protein_coding
GPRC5A	9052	ENSG00000013588	protein_coding
GPRC5B	51704	ENSG00000167191	protein_coding
GPRIN2	9721	ENSG00000204175	protein_coding
GPRIN3	285513	ENSG00000185477	protein_coding
GPT2	84706	ENSG00000166123	protein_coding
GPX8	493869	ENSG00000164294	protein_coding
GRAMD1B	57476	ENSG00000023171	protein_coding
GREB1	9687	ENSG00000196208	protein_coding
GREM1	26585	ENSG00000166923	protein_coding
GREM2	64388	ENSG00000180875	protein_coding
GRHL2	79977	ENSG00000083307	protein_coding
GRIA4	2893	ENSG00000152578	protein_coding
GRID2	2895	ENSG00000152208	protein_coding
GRID2IP	392862	ENSG00000215045	protein_coding
GRIK1	2897	ENSG00000171189	protein_coding
GRIN1	2902	ENSG00000176884	protein_coding
GRIN3B	116444	ENSG00000116032	protein_coding
GRIP1	23426	ENSG00000155974	protein_coding
GRM1	2911	ENSG00000152822	protein_coding
GRM4	2914	ENSG00000124493	protein_coding
GRM5	2915	ENSG00000168959	protein_coding
GRM6	2916	ENSG00000113262	protein_coding
GRM7	2917	ENSG00000196277	protein_coding
GRM8	2918	ENSG00000179603	protein_coding
GRPR	2925	ENSG00000126010	protein_coding
GSC	145258	ENSG00000133937	protein_coding
GSDMA	284110	ENSG00000167914	protein_coding
GSG1	83445	ENSG00000111305	protein_coding
GSTA1	2938	ENSG00000243955	protein_coding
GSTA3	2940	ENSG00000174156	protein_coding
GSTM1	2944	ENSG00000134184	protein_coding
GSTM5	2949	ENSG00000134201	protein_coding
GSTO1	9446	ENSG00000148834	protein_coding
GSTP1	2950	ENSG00000084207	protein_coding
GTSE1	51512	ENSG00000075218	protein_coding
GUCA2A	2980	ENSG00000197273	protein_coding
GULP1	51454	ENSG00000144366	protein_coding
GYS2	2998	ENSG00000111713	protein_coding
H1FNT	341567	ENSG00000187166	protein_coding
H2AFX	3014	ENSG00000188486	protein_coding
HAAO	23498	ENSG00000162882	protein_coding
HAGH	3029	ENSG00000063854	protein_coding
HAGHL	84264	ENSG00000103253	protein_coding
HAL	3034	ENSG00000084110	protein_coding
HAMP	57817	ENSG00000105697	protein_coding
HAND2	9464	ENSG00000164107	protein_coding
HAO1	54363	ENSG00000101323	protein_coding
HAPLN1	1404	ENSG00000145681	protein_coding
HAVCR1	26762	ENSG00000113249	protein_coding
HAVCR2	84868	ENSG00000135077	protein_coding
HBB	3043	ENSG00000244734	protein_coding
HBE1	3046	ENSG00000213931	protein_coding
HCN3	57657	ENSG00000143630	protein_coding
HCN4	10021	ENSG00000138622	protein_coding
HCRT	3060	ENSG00000161610	protein_coding
HDAC9	9734	ENSG00000048052	protein_coding
HDGFL1	154150	ENSG00000112273	protein_coding
HECW1	23072	ENSG00000002746	protein_coding
HEMGN	55363	ENSG00000136929	protein_coding
HEPACAM2	253012	ENSG00000188175	protein_coding
HES7	84667	ENSG00000179111	protein_coding
HGF	3082	ENSG00000019991	protein_coding
HGFAC	3083	ENSG00000109758	protein_coding
HHATL	57467	ENSG00000010282	protein_coding
HHIP	64399	ENSG00000164161	protein_coding
HHIPL2	79802	ENSG00000143512	protein_coding
HHLA2	11148	ENSG00000114455	protein_coding
HID1	283987	ENSG00000167861	protein_coding
HIF1A	3091	ENSG00000100644	protein_coding
HIST1H3G	8355	ENSG00000273983	protein_coding
HIST3H2A	92815	ENSG00000181218	protein_coding
HK2	3099	ENSG00000159399	protein_coding
HMCN2	256158	ENSG00000148357	protein_coding
HMGA2	8091	ENSG00000149948	protein_coding
HMGCLL1	54511	ENSG00000146151	protein_coding
HMGCS2	3158	ENSG00000134240	protein_coding
HMX1	3166	ENSG00000215612	protein_coding
HMX2	3167	ENSG00000188816	protein_coding
HMX3	340784	ENSG00000188620	protein_coding
HORMAD1	84072	ENSG00000143452	protein_coding
HORMAD2	150280	ENSG00000176635	protein_coding
HOXA11	3207	ENSG00000005073	protein_coding
HOXA2	3199	ENSG00000105996	protein_coding
HOXB13	10481	ENSG00000159184	protein_coding
HOXB5	3215	ENSG00000120075	protein_coding
HOXB6	3216	ENSG00000108511	protein_coding
HOXB7	3217	ENSG00000260027	protein_coding
HOXB8	3218	ENSG00000120068	protein_coding
HOXB9	3219	ENSG00000170689	protein_coding
HOXC10	3226	ENSG00000180818	protein_coding
HOXC11	3227	ENSG00000123388	protein_coding
HOXC12	3228	ENSG00000123407	protein_coding
HOXC13	3229	ENSG00000123364	protein_coding
HOXC4	3221	ENSG00000198353	protein_coding
HOXC5	3222	ENSG00000172789	protein_coding
HOXC6	3223	ENSG00000197757	protein_coding
HOXC9	3225	ENSG00000180806	protein_coding
HOXD1	3231	ENSG00000128645	protein_coding
HOXD11	3237	ENSG00000128713	protein_coding
HP	3240	ENSG00000257017	protein_coding
HPCAL4	51440	ENSG00000116983	protein_coding
HPD	3242	ENSG00000158104	protein_coding
HPDL	84842	ENSG00000186603	protein_coding
HPR	3250	ENSG00000261701	protein_coding
HPSE	10855	ENSG00000173083	protein_coding
HPSE2	60495	ENSG00000172987	protein_coding
HPX	3263	ENSG00000110169	protein_coding
HR	55806	ENSG00000168453	protein_coding
HRASLS5	117245	ENSG00000168004	protein_coding
HRG	3273	ENSG00000113905	protein_coding
HRH1	3269	ENSG00000196639	protein_coding
HRK	8739	ENSG00000135116	protein_coding
HS3ST1	9957	ENSG00000002587	protein_coding
HS3ST3A1	9955	ENSG00000153976	protein_coding
HS3ST3B1	9953	ENSG00000125430	protein_coding
HS3ST4	9951	ENSG00000182601	protein_coding
HS3ST6	64711	ENSG00000162040	protein_coding
HS6ST2	90161	ENSG00000171004	protein_coding
HS6ST3	266722	ENSG00000185352	protein_coding
HSD11B1	3290	ENSG00000117594	protein_coding
HSD17B13	345275	ENSG00000170509	protein_coding
HSD17B6	8630	ENSG00000025423	protein_coding
HSD17B8	7923	ENSG00000204228	protein_coding
HSPA12A	259217	ENSG00000165868	protein_coding
HSPA6	3310	ENSG00000173110	protein_coding
HSPB2	3316	ENSG00000170276	protein_coding
HSPB3	8988	ENSG00000169271	protein_coding
HSPB6	126393	ENSG00000004776	protein_coding
HSPB7	27129	ENSG00000173641	protein_coding
HSPB8	26353	ENSG00000152137	protein_coding
HTN3	3347	ENSG00000205649	protein_coding
HTR1F	3355	ENSG00000179097	protein_coding
HTR2B	3357	ENSG00000135914	protein_coding
HTR3A	3359	ENSG00000166736	protein_coding
HTR5A	3361	ENSG00000157219	protein_coding
HUNK	30811	ENSG00000142149	protein_coding
HYAL4	23553	ENSG00000106302	protein_coding
IAPP	3375	ENSG00000121351	protein_coding
IBSP	3381	ENSG00000029559	protein_coding
ID4	3400	ENSG00000172201	protein_coding
IDO2	169355	ENSG00000188676	protein_coding
IFI27	3429	ENSG00000165949	protein_coding
IFITM5	387733	ENSG00000206013	protein_coding
IFNE	338376	ENSG00000184995	protein_coding
IFT57	55081	ENSG00000114446	protein_coding
IGDCC3	9543	ENSG00000174498	protein_coding
IGF1R	3480	ENSG00000140443	protein_coding
IGFBP1	3484	ENSG00000146678	protein_coding
IGFBP2	3485	ENSG00000115457	protein_coding
IGFBP5	3488	ENSG00000115461	protein_coding
IGFBP6	3489	ENSG00000167779	protein_coding
IGFL1	374918	ENSG00000188293	protein_coding
IGFL2	147920	ENSG00000204866	protein_coding
IGFL3	388555	ENSG00000188624	protein_coding
IGFN1	91156	ENSG00000163395	protein_coding
IGSF11	152404	ENSG00000144847	protein_coding
IGSF23	147710	ENSG00000216588	protein_coding
IGSF3	3321	ENSG00000143061	protein_coding
IGSF5	150084	ENSG00000183067	protein_coding
IL10	3586	ENSG00000136634	protein_coding
IL11	3589	ENSG00000095752	protein_coding
IL13	3596	ENSG00000169194	protein_coding
IL13RA2	3598	ENSG00000123496	protein_coding
IL17RD	54756	ENSG00000144730	protein_coding
IL17REL	400935	ENSG00000188263	protein_coding
IL18	3606	ENSG00000150782	protein_coding
IL1A	3552	ENSG00000115008	protein_coding
IL1RL1	9173	ENSG00000115602	protein_coding
IL1RN	3557	ENSG00000136689	protein_coding
IL20	50604	ENSG00000162891	protein_coding
IL20RA	53832	ENSG00000016402	protein_coding
IL21R	50615	ENSG00000103522	protein_coding
IL22RA2	116379	ENSG00000164485	protein_coding
IL2RA	3559	ENSG00000134460	protein_coding
IL2RB	3560	ENSG00000100385	protein_coding
IL31RA	133396	ENSG00000164509	protein_coding
IL6	3569	ENSG00000136244	protein_coding
IL9R	3581	ENSGR0000124334	protein_coding
ILDR1	286676	ENSG00000145103	protein_coding
INA	9118	ENSG00000148798	protein_coding
INHA	3623	ENSG00000123999	protein_coding
INPP4B	8821	ENSG00000109452	protein_coding
INSL3	3640	ENSG00000248099	protein_coding
INSM1	3642	ENSG00000173404	protein_coding
INSRR	3645	ENSG00000027644	protein_coding
IQCA1	79781	ENSG00000132321	protein_coding
IQGAP1	8826	ENSG00000140575	protein_coding
IQSEC2	23096	ENSG00000124313	protein_coding
IRX2	153572	ENSG00000170561	protein_coding
IRX6	79190	ENSG00000159387	protein_coding
ISLR	3671	ENSG00000129009	protein_coding
ISM2	145501	ENSG00000100593	protein_coding
ISYNA1	51477	ENSG00000105655	protein_coding
ITGA2	3673	ENSG00000164171	protein_coding
ITGA3	3675	ENSG00000005884	protein_coding
ITGAD	3681	ENSG00000156886	protein_coding
ITGAM	3684	ENSG00000169896	protein_coding
ITGAV	3685	ENSG00000138448	protein_coding
ITGB4	3691	ENSG00000132470	protein_coding
ITGB6	3694	ENSG00000115221	protein_coding
ITGB8	3696	ENSG00000105855	protein_coding
ITIH1	3697	ENSG00000055957	protein_coding
ITIH2	3698	ENSG00000151655	protein_coding
ITIH3	3699	ENSG00000162267	protein_coding
ITIH5	80760	ENSG00000123243	protein_coding
ITIH6	347365	ENSG00000102313	protein_coding
ITLN1	55600	ENSG00000179914	protein_coding
ITLN2	142683	ENSG00000158764	protein_coding
ITM2A	9452	ENSG00000078596	protein_coding
ITPR3	3710	ENSG00000096433	protein_coding
IZUMO1R	390243	ENSG00000183560	protein_coding
IZUMO4	113177	ENSG00000099840	protein_coding
JAG1	182	ENSG00000101384	protein_coding
JAKMIP2	9832	ENSG00000176049	protein_coding
JAKMIP3	282973	ENSG00000188385	protein_coding
JPH2	57158	ENSG00000149596	protein_coding
JPH3	57338	ENSG00000154118	protein_coding
KAAG1	353219	ENSG00000146049	protein_coding
KAZN	23254	ENSG00000189337	protein_coding
KCNA1	3736	ENSG00000111262	protein_coding
KCNB1	3745	ENSG00000158445	protein_coding
KCNB2	9312	ENSG00000182674	protein_coding
KCNC1	3746	ENSG00000129159	protein_coding
KCNC4	3749	ENSG00000116396	protein_coding
KCND2	3751	ENSG00000184408	protein_coding
KCND3	3752	ENSG00000171385	protein_coding
KCNE4	23704	ENSG00000152049	protein_coding
KCNH2	3757	ENSG00000055118	protein_coding
KCNH3	23416	ENSG00000135519	protein_coding
KCNH8	131096	ENSG00000183960	protein_coding
KCNIP2	30819	ENSG00000120049	protein_coding
KCNJ13	3769	ENSG00000115474	protein_coding
KCNJ16	3773	ENSG00000153822	protein_coding
KCNK10	54207	ENSG00000100433	protein_coding
KCNK12	56660	ENSG00000184261	protein_coding
KCNK17	89822	ENSG00000124780	protein_coding
KCNK2	3776	ENSG00000082482	protein_coding
KCNK3	3777	ENSG00000171303	protein_coding
KCNK5	8645	ENSG00000164626	protein_coding
KCNMB4	27345	ENSG00000135643	protein_coding
KCNN4	3783	ENSG00000104783	protein_coding
KCNQ1	3784	ENSG00000053918	protein_coding
KCNQ2	3785	ENSG00000075043	protein_coding
KCNQ3	3786	ENSG00000184156	protein_coding
KCNQ4	9132	ENSG00000117013	protein_coding
KCNQ5	56479	ENSG00000185760	protein_coding
KCNS1	3787	ENSG00000124134	protein_coding
KCNS2	3788	ENSG00000156486	protein_coding
KCNT1	57582	ENSG00000107147	protein_coding
KCNV1	27012	ENSG00000164794	protein_coding
KCP	375616	ENSG00000135253	protein_coding
KCTD16	57528	ENSG00000183775	protein_coding
KCTD17	79734	ENSG00000100379	protein_coding
KCTD19	146212	ENSG00000168676	protein_coding
KCTD8	386617	ENSG00000183783	protein_coding
KEL	3792	ENSG00000197993	protein_coding
KHK	3795	ENSG00000138030	protein_coding
KIAA0319	9856	ENSG00000137261	protein_coding
KIAA1210	57481	ENSG00000250423	protein_coding
KIAA1211	57482	ENSG00000109265	protein_coding
KIAA1324	57535	ENSG00000116299	protein_coding
KIAA1324L	222223	ENSG00000164659	protein_coding
KIAA1549L	25758	ENSG00000110427	protein_coding
KIF23	9493	ENSG00000137807	protein_coding
KIF26B	55083	ENSG00000162849	protein_coding
KIF3C	3797	ENSG00000084731	protein_coding
KIF5A	3798	ENSG00000155980	protein_coding
KIRREL2	84063	ENSG00000126259	protein_coding
KISS1R	84634	ENSG00000116014	protein_coding
KLC3	147700	ENSG00000104892	protein_coding
KLF14	136259	ENSG00000266265	protein_coding
KLF15	28999	ENSG00000163884	protein_coding
KLF17	128209	ENSG00000171872	protein_coding
KLF5	688	ENSG00000102554	protein_coding
KLHDC8A	55220	ENSG00000162873	protein_coding
KLHL30	377007	ENSG00000168427	protein_coding
KLHL4	56062	ENSG00000102271	protein_coding
KLHL41	10324	ENSG00000239474	protein_coding
KLK1	3816	ENSG00000167748	protein_coding
KLK10	5655	ENSG00000129451	protein_coding
KLK11	11012	ENSG00000167757	protein_coding
KLK15	55554	ENSG00000174562	protein_coding
KLK4	9622	ENSG00000167749	protein_coding
KLK6	5653	ENSG00000167755	protein_coding
KLKB1	3818	ENSG00000164344	protein_coding
KLRC1	3821	ENSG00000134545	protein_coding
KNG1	3827	ENSG00000113889	protein_coding
KPRP	448834	ENSG00000203786	protein_coding
KRBA1	84626	ENSG00000133619	protein_coding
KRT12	3859	ENSG00000187242	protein_coding
KRT15	3866	ENSG00000171346	protein_coding
KRT17	3872	ENSG00000128422	protein_coding
KRT19	3880	ENSG00000171345	protein_coding
KRT2	3849	ENSG00000172867	protein_coding
KRT20	54474	ENSG00000171431	protein_coding
KRT34	3885	ENSG00000131737	protein_coding
KRT4	3851	ENSG00000170477	protein_coding
KRT6C	286887	ENSG00000170465	protein_coding
KRT7	3855	ENSG00000135480	protein_coding
KRT75	9119	ENSG00000170454	protein_coding
KRT77	374454	ENSG00000189182	protein_coding
KRT80	144501	ENSG00000167767	protein_coding
KRT81	3887	ENSG00000205426	protein_coding
KRT83	3889	ENSG00000170523	protein_coding
KRT85	3891	ENSG00000135443	protein_coding
KY	339855	ENSG00000174611	protein_coding
L1CAM	3897	ENSG00000198910	protein_coding
L1TD1	54596	ENSG00000240563	protein_coding
LAD1	3898	ENSG00000159166	protein_coding
LAG3	3902	ENSG00000089692	protein_coding
LAMA3	3909	ENSG00000053747	protein_coding
LAMA5	3911	ENSG00000130702	protein_coding
LAMB1	3912	ENSG00000091136	protein_coding
LAMB4	22798	ENSG00000091128	protein_coding
LAMC2	3918	ENSG00000058085	protein_coding
LAMP5	24141	ENSG00000125869	protein_coding
LANCL3	347404	ENSG00000147036	protein_coding
LARP6	55323	ENSG00000166173	protein_coding
LBX2	85474	ENSG00000179528	protein_coding
LCA5	167691	ENSG00000135338	protein_coding
LCAT	3931	ENSG00000213398	protein_coding
LCE1C	353133	ENSG00000197084	protein_coding
LCE2D	353141	ENSG00000187223	protein_coding
LCN12	286256	ENSG00000184925	protein_coding
LCN15	389812	ENSG00000177984	protein_coding
LCN6	158062	ENSG00000267206	protein_coding
LCNL1	401562	ENSG00000214402	protein_coding
LCTL	197021	ENSG00000188501	protein_coding
LDHB	3945	ENSG00000111716	protein_coding
LDLRAD3	143458	ENSG00000179241	protein_coding
LDOC1	23641	ENSG00000182195	protein_coding
LEAP2	116842	ENSG00000164406	protein_coding
LECT2	3950	ENSG00000145826	protein_coding
LEF1	51176	ENSG00000138795	protein_coding
LEFTY1	10637	ENSG00000243709	protein_coding
LEFTY2	7044	ENSG00000143768	protein_coding
LEMD1	93273	ENSG00000186007	protein_coding
LEP	3952	ENSG00000174697	protein_coding
LEPR	3953	ENSG00000116678	protein_coding
LETM2	137994	ENSG00000165046	protein_coding
LGALS12	85329	ENSG00000133317	protein_coding
LGALS14	56891	ENSG00000006659	protein_coding
LGALS2	3957	ENSG00000100079	protein_coding
LGI1	9211	ENSG00000108231	protein_coding
LGI2	55203	ENSG00000153012	protein_coding
LGI3	203190	ENSG00000168481	protein_coding
LGR6	59352	ENSG00000133067	protein_coding
LHB	3972	ENSG00000104826	protein_coding
LHFPL1	340596	ENSG00000182508	protein_coding
LHFPL3	375612	ENSG00000187416	protein_coding
LHFPL4	375323	ENSG00000156959	protein_coding
LHFPL5	222662	ENSG00000197753	protein_coding
LHPP	64077	ENSG00000107902	protein_coding
LHX2	9355	ENSG00000106689	protein_coding
LHX5	64211	ENSG00000089116	protein_coding
LHX8	431707	ENSG00000162624	protein_coding
LIF	3976	ENSG00000128342	protein_coding
LIMCH1	22998	ENSG00000064042	protein_coding
LIMD2	80774	ENSG00000136490	protein_coding
LIMK1	3984	ENSG00000106683	protein_coding
LIN28A	79727	ENSG00000131914	protein_coding
LIPC	3990	ENSG00000166035	protein_coding
LIPE	3991	ENSG00000079435	protein_coding
LIPH	200879	ENSG00000163898	protein_coding
LIPM	340654	ENSG00000173239	protein_coding
LIPN	643418	ENSG00000204020	protein_coding
LIX1	167410	ENSG00000145721	protein_coding
LKAAEAR1	198437	ENSG00000171695	protein_coding
LMAN1L	79748	ENSG00000140506	protein_coding
LMNTD1	160492	ENSG00000152936	protein_coding
LMO3	55885	ENSG00000048540	protein_coding
LMOD2	442721	ENSG00000170807	protein_coding
LMTK3	114783	ENSG00000142235	protein_coding
LMX1A	4009	ENSG00000162761	protein_coding
LMX1B	4010	ENSG00000136944	protein_coding
LOXL1	4016	ENSG00000129038	protein_coding
LPA	4018	ENSG00000198670	protein_coding
LPAR1	1902	ENSG00000198121	protein_coding
LPAR2	9170	ENSG00000064547	protein_coding
LPAR5	57121	ENSG00000184574	protein_coding
LPCAT4	254531	ENSG00000176454	protein_coding
LPO	4025	ENSG00000167419	protein_coding
LRCOL1	100507055	ENSG00000204583	protein_coding
LRFN1	57622	ENSG00000128011	protein_coding
LRFN2	57497	ENSG00000156564	protein_coding
LRP12	29967	ENSG00000147650	protein_coding
LRP8	7804	ENSG00000157193	protein_coding
LRRC1	55227	ENSG00000137269	protein_coding
LRRC15	131578	ENSG00000172061	protein_coding
LRRC17	10234	ENSG00000128606	protein_coding
LRRC20	55222	ENSG00000172731	protein_coding
LRRC25	126364	ENSG00000175489	protein_coding
LRRC26	389816	ENSG00000184709	protein_coding
LRRC3	81543	ENSG00000160233	protein_coding
LRRC38	126755	ENSG00000162494	protein_coding
LRRC39	127495	ENSG00000122477	protein_coding
LRRC49	54839	ENSG00000137821	protein_coding
LRRC52	440699	ENSG00000162763	protein_coding
LRRC7	57554	ENSG00000033122	protein_coding
LRRC74A	145497	ENSG00000100565	protein_coding
LRRC8B	23507	ENSG00000197147	protein_coding
LRRIQ1	84125	ENSG00000133640	protein_coding
LRRK1	79705	ENSG00000154237	protein_coding
LRRN1	57633	ENSG00000175928	protein_coding
LRRN2	10446	ENSG00000170382	protein_coding
LRRN4	164312	ENSG00000125872	protein_coding
LSAMP	4045	ENSG00000185565	protein_coding
LTB	4050	ENSG00000227507	protein_coding
LTF	4057	ENSG00000012223	protein_coding
LUZP2	338645	ENSG00000187398	protein_coding
LY6K	54742	ENSG00000160886	protein_coding
LYPD1	116372	ENSG00000150551	protein_coding
LYPD6	130574	ENSG00000187123	protein_coding
LYPD6B	130576	ENSG00000150556	protein_coding
LYVE1	10894	ENSG00000133800	protein_coding
M1AP	130951	ENSG00000159374	protein_coding
MAB21L1	4081	ENSG00000180660	protein_coding
MAB21L2	10586	ENSG00000181541	protein_coding
MACC1	346389	ENSG00000183742	protein_coding
MAFA	389692	ENSG00000182759	protein_coding
MAGEA10	4109	ENSG00000124260	protein_coding
MAGEA11	4110	ENSG00000185247	protein_coding
MAGEA4	4103	ENSG00000147381	protein_coding
MAGEA9	4108	ENSG00000267978	protein_coding
MAGEB1	4112	ENSG00000214107	protein_coding
MAGEB16	139604	ENSG00000189023	protein_coding
MAL	4118	ENSG00000172005	protein_coding
MALRD1	340895	ENSG00000204740	protein_coding
MAMDC2	256691	ENSG00000165072	protein_coding
MAP1A	4130	ENSG00000166963	protein_coding
MAP1LC3C	440738	ENSG00000197769	protein_coding
MAP3K15	389840	ENSG00000180815	protein_coding
MAP7D2	256714	ENSG00000184368	protein_coding
MAP9	79884	ENSG00000164114	protein_coding
MAPK10	5602	ENSG00000109339	protein_coding
MAPK13	5603	ENSG00000156711	protein_coding
MAPK4	5596	ENSG00000141639	protein_coding
MARK1	4139	ENSG00000116141	protein_coding
MASP1	5648	ENSG00000127241	protein_coding
MASP2	10747	ENSG00000009724	protein_coding
MAT1A	4143	ENSG00000151224	protein_coding
MATN3	4148	ENSG00000132031	protein_coding
MATN4	8785	ENSG00000124159	protein_coding
MBOAT2	129642	ENSG00000143797	protein_coding
MCCD1	401250	ENSG00000204511	protein_coding
MCEMP1	199675	ENSG00000183019	protein_coding
MCF2	4168	ENSG00000101977	protein_coding
MCIDAS	345643	ENSG00000234602	protein_coding
MCOLN2	255231	ENSG00000153898	protein_coding
MCOLN3	55283	ENSG00000055732	protein_coding
MDFI	4188	ENSG00000112559	protein_coding
MDGA1	266727	ENSG00000112139	protein_coding
MDH1B	130752	ENSG00000138400	protein_coding
ME3	10873	ENSG00000151376	protein_coding
MECOM	2122	ENSG00000085276	protein_coding
MEGF10	84466	ENSG00000145794	protein_coding
MEIS3	56917	ENSG00000105419	protein_coding
MEP1A	4224	ENSG00000112818	protein_coding
MEP1B	4225	ENSG00000141434	protein_coding
METTL21C	196541	ENSG00000139780	protein_coding
METTL7A	25840	ENSG00000185432	protein_coding
MEX3A	92312	ENSG00000254726	protein_coding
MFSD6L	162387	ENSG00000185156	protein_coding
MGAM	8972	ENSG00000257335	protein_coding
MGAT3	4248	ENSG00000128268	protein_coding
MGAT4C	25834	ENSG00000182050	protein_coding
MGAT5	4249	ENSG00000152127	protein_coding
MGAT5B	146664	ENSG00000167889	protein_coding
MGMT	4255	ENSG00000170430	protein_coding
MGST2	4258	ENSG00000085871	protein_coding
MIA	8190	ENSG00000261857	protein_coding
MIOX	55586	ENSG00000100253	protein_coding
MISP	126353	ENSG00000099812	protein_coding
MITF	4286	ENSG00000187098	protein_coding
MKRN2OS	100129480	ENSG00000225526	protein_coding
MLANA	2315	ENSG00000120215	protein_coding
MLIP	90523	ENSG00000146147	protein_coding
MLLT3	4300	ENSG00000171843	protein_coding
MLNR	2862	ENSG00000102539	protein_coding
MLXIPL	51085	ENSG00000009950	protein_coding
MME	4311	ENSG00000196549	protein_coding
MMP1	4312	ENSG00000196611	protein_coding
MMP10	4319	ENSG00000166670	protein_coding
MMP11	4320	ENSG00000099953	protein_coding
MMP13	4322	ENSG00000137745	protein_coding
MMP14	4323	ENSG00000157227	protein_coding
MMP16	4325	ENSG00000156103	protein_coding
MMP2	4313	ENSG00000087245	protein_coding
MMP24	10893	ENSG00000125966	protein_coding
MMP27	64066	ENSG00000137675	protein_coding
MMP28	79148	ENSG00000271447	protein_coding
MMP3	4314	ENSG00000149968	protein_coding
MMP7	4316	ENSG00000137673	protein_coding
MN1	4330	ENSG00000169184	protein_coding
MNX1	3110	ENSG00000130675	protein_coding
MORC1	27136	ENSG00000114487	protein_coding
MOV10L1	54456	ENSG00000073146	protein_coding
MOXD1	26002	ENSG00000079931	protein_coding
MPLKIP	136647	ENSG00000168303	protein_coding
MPP2	4355	ENSG00000108852	protein_coding
MPP3	4356	ENSG00000161647	protein_coding
MPPED1	758	ENSG00000186732	protein_coding
MRC2	9902	ENSG00000011028	protein_coding
MRGPRX3	117195	ENSG00000179826	protein_coding
MROH2B	133558	ENSG00000171495	protein_coding
MRVI1	10335	ENSG00000072952	protein_coding
MS4A1	931	ENSG00000156738	protein_coding
MS4A10	341116	ENSG00000172689	protein_coding
MS4A15	219995	ENSG00000166961	protein_coding
MS4A2	2206	ENSG00000149534	protein_coding
MS4A6E	245802	ENSG00000166926	protein_coding
MS4A8	83661	ENSG00000166959	protein_coding
MSC	9242	ENSG00000178860	protein_coding
MSLN	10232	ENSG00000102854	protein_coding
MSMB	4477	ENSG00000263639	protein_coding
MSMO1	6307	ENSG00000052802	protein_coding
MST1	4485	ENSG00000173531	protein_coding
MST1R	4486	ENSG00000164078	protein_coding
MSX1	4487	ENSG00000163132	protein_coding
MSX2	4488	ENSG00000120149	protein_coding
MT1B	4490	ENSG00000169688	protein_coding
MT1E	4493	ENSG00000169715	protein_coding
MT1G	4495	ENSG00000125144	protein_coding
MT1H	4496	ENSG00000205358	protein_coding
MT1M	4499	ENSG00000205364	protein_coding
MT1X	4501	ENSG00000187193	protein_coding
MT3	4504	ENSG00000087250	protein_coding
MTCL1	23255	ENSG00000168502	protein_coding
MTNR1A	4543	ENSG00000168412	protein_coding
MTRNR2L12	100463498	ENSG00000269028	protein_coding
MTUS2	23281	ENSG00000132938	protein_coding
MUC1	4582	ENSG00000185499	protein_coding
MUC12	10071	ENSG00000205277	protein_coding
MUC13	56667	ENSG00000173702	protein_coding
MUC16	94025	ENSG00000181143	protein_coding
MUC3A	4584	ENSG00000169894	protein_coding
MUC5AC	4586	ENSG00000215182	protein_coding
MUC6	4588	ENSG00000184956	protein_coding
MUC7	4589	ENSG00000171195	protein_coding
MUCL1	118430	ENSG00000172551	protein_coding
MUSTN1	389125	ENSG00000272573	protein_coding
MXRA5	25878	ENSG00000101825	protein_coding
MXRA8	54587	ENSG00000162576	protein_coding
MYBL2	4605	ENSG00000101057	protein_coding
MYBPC1	4604	ENSG00000196091	protein_coding
MYBPC2	4606	ENSG00000086967	protein_coding
MYBPHL	343263	ENSG00000221986	protein_coding
MYCL	4610	ENSG00000116990	protein_coding
MYEF2	50804	ENSG00000104177	protein_coding
MYEOV	26579	ENSG00000172927	protein_coding
MYF6	4618	ENSG00000111046	protein_coding
MYH13	8735	ENSG00000006788	protein_coding
MYH15	22989	ENSG00000144821	protein_coding
MYH7	4625	ENSG00000092054	protein_coding
MYL9	10398	ENSG00000101335	protein_coding
MYLIP	29116	ENSG00000007944	protein_coding
MYLK2	85366	ENSG00000101306	protein_coding
MYO10	4651	ENSG00000145555	protein_coding
MYO3A	53904	ENSG00000095777	protein_coding
MYOD1	4654	ENSG00000129152	protein_coding
MYOF	26509	ENSG00000138119	protein_coding
MYOZ2	51778	ENSG00000172399	protein_coding
MYT1L	23040	ENSG00000186487	protein_coding
MYZAP	100820829	ENSG00000263155	protein_coding
NAALADL1	10004	ENSG00000168060	protein_coding
NADK2	133686	ENSG00000152620	protein_coding
NANOS1	340719	ENSG00000188613	protein_coding
NANOS3	342977	ENSG00000187556	protein_coding
NAT14	57106	ENSG00000090971	protein_coding
NAT16	375607	ENSG00000167011	protein_coding
NAT8	9027	ENSG00000144035	protein_coding
NAT8L	339983	ENSG00000185818	protein_coding
NBEA	26960	ENSG00000172915	protein_coding
NBL1	4681	ENSG00000158747	protein_coding
NBPF6	653149	ENSG00000186086	protein_coding
NCAM2	4685	ENSG00000154654	protein_coding
NCAN	1463	ENSG00000130287	protein_coding
NCCRP1	342897	ENSG00000188505	protein_coding
NCEH1	57552	ENSG00000144959	protein_coding
NCR3LG1	374383	ENSG00000188211	protein_coding
NDNF	79625	ENSG00000173376	protein_coding
NDP	4693	ENSG00000124479	protein_coding
NDRG4	65009	ENSG00000103034	protein_coding
NDST4	64579	ENSG00000138653	protein_coding
NEBL	10529	ENSG00000078114	protein_coding
NECAB1	64168	ENSG00000123119	protein_coding
NEFH	4744	ENSG00000100285	protein_coding
NEFL	4747	ENSG00000277586	protein_coding
NEK11	79858	ENSG00000114670	protein_coding
NELL1	4745	ENSG00000165973	protein_coding
NEU4	129807	ENSG00000204099	protein_coding
NEURL3	93082	ENSG00000163121	protein_coding
NEUROD1	4760	ENSG00000162992	protein_coding
NEUROG3	50674	ENSG00000122859	protein_coding
NFE2L3	9603	ENSG00000050344	protein_coding
NGB	58157	ENSG00000165553	protein_coding
NHLH2	4808	ENSG00000177551	protein_coding
NHS	4810	ENSG00000188158	protein_coding
NIPAL4	348938	ENSG00000172548	protein_coding
NKAIN3	286183	ENSG00000185942	protein_coding
NKAIN4	128414	ENSG00000101198	protein_coding
NKPD1	284353	ENSG00000179846	protein_coding
NLGN1	22871	ENSG00000169760	protein_coding
NLRP2	55655	ENSG00000022556	protein_coding
NLRP3	114548	ENSG00000162711	protein_coding
NLRP5	126206	ENSG00000171487	protein_coding
NLRP6	171389	ENSG00000174885	protein_coding
NLRP8	126205	ENSG00000179709	protein_coding
NMB	4828	ENSG00000197696	protein_coding
NME5	8382	ENSG00000112981	protein_coding
NME9	347736	ENSG00000181322	protein_coding
NMNAT2	23057	ENSG00000157064	protein_coding
NMU	10874	ENSG00000109255	protein_coding
NMUR2	56923	ENSG00000132911	protein_coding
NOTO	344022	ENSG00000214513	protein_coding
NOV	4856	ENSG00000136999	protein_coding
NPAS1	4861	ENSG00000130751	protein_coding
NPFFR1	64106	ENSG00000148734	protein_coding
NPHP1	4867	ENSG00000144061	protein_coding
NPHS1	4868	ENSG00000161270	protein_coding
NPHS2	7827	ENSG00000116218	protein_coding
NPNT	255743	ENSG00000168743	protein_coding
NPPB	4879	ENSG00000120937	protein_coding
NPTX1	4884	ENSG00000171246	protein_coding
NPTX2	4885	ENSG00000106236	protein_coding
NPY2R	4887	ENSG00000185149	protein_coding
NPY4R	5540	ENSG00000204174	protein_coding
NR0B1	190	ENSG00000169297	protein_coding
NR1I3	9970	ENSG00000143257	protein_coding
NR4A3	8013	ENSG00000119508	protein_coding
NRCAM	4897	ENSG00000091129	protein_coding
NRG3	10718	ENSG00000185737	protein_coding
NRSN1	140767	ENSG00000152954	protein_coding
NRXN1	9378	ENSG00000179915	protein_coding
NSUN7	79730	ENSG00000179299	protein_coding
NT5DC4	284958	ENSG00000144130	protein_coding
NTF4	4909	ENSG00000225950	protein_coding
NTM	50863	ENSG00000182667	protein_coding
NTNG1	22854	ENSG00000162631	protein_coding
NTNG2	84628	ENSG00000196358	protein_coding
NTRK1	4914	ENSG00000198400	protein_coding
NTRK2	4915	ENSG00000148053	protein_coding
NTS	4922	ENSG00000133636	protein_coding
NTSR2	23620	ENSG00000169006	protein_coding
NUDT11	55190	ENSG00000196368	protein_coding
NUMBL	9253	ENSG00000105245	protein_coding
NUP210L	91181	ENSG00000143552	protein_coding
NWD1	284434	ENSG00000188039	protein_coding
NWD2	57495	ENSG00000174145	protein_coding
NXN	64359	ENSG00000167693	protein_coding
NXNL1	115861	ENSG00000171773	protein_coding
NXNL2	158046	ENSG00000130045	protein_coding
NXPE1	120400	ENSG00000095110	protein_coding
NXPE3	91775	ENSG00000144815	protein_coding
NXPE4	54827	ENSG00000137634	protein_coding
NXPH2	11249	ENSG00000144227	protein_coding
NXPH4	11247	ENSG00000182379	protein_coding
NYAP2	57624	ENSG00000144460	protein_coding
OBSCN	84033	ENSG00000154358	protein_coding
OCA2	4948	ENSG00000104044	protein_coding
OCEL1	79629	ENSG00000099330	protein_coding
ODF2L	57489	ENSG00000122417	protein_coding
OFCC1	266553	ENSG00000181355	protein_coding
OGFRL1	79627	ENSG00000119900	protein_coding
OLAH	55301	ENSG00000152463	protein_coding
OLFM1	10439	ENSG00000130558	protein_coding
OLFM3	118427	ENSG00000118733	protein_coding
OLFM4	10562	ENSG00000102837	protein_coding
OLFML2B	25903	ENSG00000162745	protein_coding
OLR1	4973	ENSG00000173391	protein_coding
OMG	4974	ENSG00000126861	protein_coding
OPRD1	4985	ENSG00000116329	protein_coding
OR11A1	26531	ENSG00000204694	protein_coding
OR1F1	4992	ENSG00000168124	protein_coding
OR2H1	26716	ENSG00000204688	protein_coding
OR2H2	7932	ENSG00000204657	protein_coding
OR4A47	403253	ENSG00000237388	protein_coding
OR52E8	390079	ENSG00000183269	protein_coding
OR5M10	390167	ENSG00000254834	protein_coding
ORAI2	80228	ENSG00000160991	protein_coding
ORM2	5005	ENSG00000228278	protein_coding
OSBPL10	114884	ENSG00000144645	protein_coding
OSM	5008	ENSG00000099985	protein_coding
OSMR	9180	ENSG00000145623	protein_coding
OSR2	116039	ENSG00000164920	protein_coding
OSTN	344901	ENSG00000188729	protein_coding
OTC	5009	ENSG00000036473	protein_coding
OTOG	340990	ENSG00000188162	protein_coding
OTOGL	283310	ENSG00000165899	protein_coding
OTOP3	347741	ENSG00000182938	protein_coding
OTX1	5013	ENSG00000115507	protein_coding
OVOL2	58495	ENSG00000125850	protein_coding
OXT	5020	ENSG00000101405	protein_coding
OXTR	5021	ENSG00000180914	protein_coding
P2RX5	5026	ENSG00000083454	protein_coding
P2RX6	9127	ENSG00000099957	protein_coding
P2RY10	27334	ENSG00000078589	protein_coding
P2RY12	64805	ENSG00000169313	protein_coding
P2RY4	5030	ENSG00000186912	protein_coding
P3H2	55214	ENSG00000090530	protein_coding
P4HA3	283208	ENSG00000149380	protein_coding
PACSIN1	29993	ENSG00000124507	protein_coding
PADI1	29943	ENSG00000142623	protein_coding
PADI2	11240	ENSG00000117115	protein_coding
PADI3	51702	ENSG00000142619	protein_coding
PAEP	5047	ENSG00000122133	protein_coding
PAFAH1B3	5050	ENSG00000079462	protein_coding
PAGE1	8712	ENSG00000068985	protein_coding
PAK6	56924	ENSG00000137843	protein_coding
PALM	5064	ENSG00000099864	protein_coding
PALMD	54873	ENSG00000099260	protein_coding
PANK1	53354	ENSG00000152782	protein_coding
PAOX	196743	ENSG00000148832	protein_coding
PAPLN	89932	ENSG00000100767	protein_coding
PAPPA2	60676	ENSG00000116183	protein_coding
PAQR5	54852	ENSG00000137819	protein_coding
PASD1	139135	ENSG00000166049	protein_coding
PAX2	5076	ENSG00000075891	protein_coding
PAX3	5077	ENSG00000135903	protein_coding
PAX7	5081	ENSG00000009709	protein_coding
PAX9	5083	ENSG00000198807	protein_coding
PBX4	80714	ENSG00000105717	protein_coding
PCBD1	5092	ENSG00000166228	protein_coding
PCBP3	54039	ENSG00000183570	protein_coding
PCDH10	57575	ENSG00000138650	protein_coding
PCDH19	57526	ENSG00000165194	protein_coding
PCDH20	64881	ENSG00000280165	protein_coding
PCDH7	5099	ENSG00000169851	protein_coding
PCDH9	5101	ENSG00000184226	protein_coding
PCDHA10	56139	ENSG00000250120	protein_coding
PCDHA12	56137	ENSG00000251664	protein_coding
PCDHA5	56143	ENSG00000204965	protein_coding
PCDHA9	9752	ENSG00000204961	protein_coding
PCDHB1	29930	ENSG00000171815	protein_coding
PCDHB10	56126	ENSG00000120324	protein_coding
PCDHB6	56130	ENSG00000113211	protein_coding
PCDHGA11	56105	ENSG00000253873	protein_coding
PCDHGA12	26025	ENSG00000253159	protein_coding
PCK2	5106	ENSG00000100889	protein_coding
PCLO	27445	ENSG00000186472	protein_coding
PCP4L1	654790	ENSG00000248485	protein_coding
PCSK1N	27344	ENSG00000102109	protein_coding
PCSK2	5126	ENSG00000125851	protein_coding
PCYT1B	9468	ENSG00000102230	protein_coding
PCYT2	5833	ENSG00000185813	protein_coding
PDCD1	5133	ENSG00000188389	protein_coding
PDCD1LG2	80380	ENSG00000197646	protein_coding
PDE10A	10846	ENSG00000112541	protein_coding
PDE1C	5137	ENSG00000154678	protein_coding
PDE3A	5139	ENSG00000172572	protein_coding
PDE5A	8654	ENSG00000138735	protein_coding
PDE9A	5152	ENSG00000160191	protein_coding
PDGFD	80310	ENSG00000170962	protein_coding
PDGFRL	5157	ENSG00000104213	protein_coding
PDIA2	64714	ENSG00000185615	protein_coding
PDK4	5166	ENSG00000004799	protein_coding
PDLIM4	8572	ENSG00000131435	protein_coding
PDP1	54704	ENSG00000164951	protein_coding
PDPN	10630	ENSG00000162493	protein_coding
PDZRN3	23024	ENSG00000121440	protein_coding
PEBP1	5037	ENSG00000089220	protein_coding
PECR	55825	ENSG00000115425	protein_coding
PEG3	5178	ENSG00000198300	protein_coding
PELI2	57161	ENSG00000139946	protein_coding
PEMT	10400	ENSG00000133027	protein_coding
PENK	5179	ENSG00000181195	protein_coding
PF4	5196	ENSG00000163737	protein_coding
PF4V1	5197	ENSG00000109272	protein_coding
PFKFB1	5207	ENSG00000158571	protein_coding
PFKFB3	5209	ENSG00000170525	protein_coding
PFKM	5213	ENSG00000152556	protein_coding
PFKP	5214	ENSG00000067057	protein_coding
PFN2	5217	ENSG00000070087	protein_coding
PGF	5228	ENSG00000119630	protein_coding
PGK2	5232	ENSG00000170950	protein_coding
PGLYRP2	114770	ENSG00000161031	protein_coding
PGLYRP4	57115	ENSG00000163218	protein_coding
PGM2L1	283209	ENSG00000165434	protein_coding
PGM5	5239	ENSG00000154330	protein_coding
PHACTR3	116154	ENSG00000087495	protein_coding
PHF21B	112885	ENSG00000056487	protein_coding
PHGR1	644844	ENSG00000233041	protein_coding
PHLDB1	23187	ENSG00000019144	protein_coding
PHOX2A	401	ENSG00000165462	protein_coding
PHYH	5264	ENSG00000107537	protein_coding
PI3	5266	ENSG00000124102	protein_coding
PIANP	196500	ENSG00000139200	protein_coding
PIF1	80119	ENSG00000140451	protein_coding
PIFO	128344	ENSG00000173947	protein_coding
PIP	5304	ENSG00000159763	protein_coding
PIPOX	51268	ENSG00000179761	protein_coding
PITPNM3	83394	ENSG00000091622	protein_coding
PITX1	5307	ENSG00000069011	protein_coding
PITX2	5308	ENSG00000164093	protein_coding
PIWIL4	143689	ENSG00000134627	protein_coding
PKHD1	5314	ENSG00000170927	protein_coding
PKIA	5569	ENSG00000171033	protein_coding
PKLR	5313	ENSG00000143627	protein_coding
PKM	5315	ENSG00000067225	protein_coding
PKP3	11187	ENSG00000184363	protein_coding
PLA2G12B	84647	ENSG00000138308	protein_coding
PLA2G1B	5319	ENSG00000170890	protein_coding
PLA2G2A	5320	ENSG00000188257	protein_coding
PLA2G2E	30814	ENSG00000188784	protein_coding
PLA2G4A	5321	ENSG00000116711	protein_coding
PLA2G4D	283748	ENSG00000159337	protein_coding
PLA2G4E	123745	ENSG00000188089	protein_coding
PLA2G4F	255189	ENSG00000168907	protein_coding
PLA2G7	7941	ENSG00000146070	protein_coding
PLA2R1	22925	ENSG00000153246	protein_coding
PLAC1	10761	ENSG00000170965	protein_coding
PLAC8	51316	ENSG00000145287	protein_coding
PLAC9	219348	ENSG00000189129	protein_coding
PLAGL1	5325	ENSG00000118495	protein_coding
PLAU	5328	ENSG00000122861	protein_coding
PLAUR	5329	ENSG00000011422	protein_coding
PLB1	151056	ENSG00000163803	protein_coding
PLCD3	113026	ENSG00000161714	protein_coding
PLD4	122618	ENSG00000166428	protein_coding
PLD5	200150	ENSG00000180287	protein_coding
PLEKHA2	59339	ENSG00000169499	protein_coding
PLEKHB1	58473	ENSG00000021300	protein_coding
PLEKHD1	400224	ENSG00000175985	protein_coding
PLEKHG4	25894	ENSG00000196155	protein_coding
PLEKHG4B	153478	ENSG00000153404	protein_coding
PLEKHH2	130271	ENSG00000152527	protein_coding
PLEKHS1	79949	ENSG00000148735	protein_coding
PLG	5340	ENSG00000122194	protein_coding
PLIN1	5346	ENSG00000166819	protein_coding
PLIN5	440503	ENSG00000214456	protein_coding
PLN	5350	ENSG00000198523	protein_coding
PLSCR5	389158	ENSG00000231213	protein_coding
PLTP	5360	ENSG00000100979	protein_coding
PLXDC1	57125	ENSG00000161381	protein_coding
PLXNA4	91584	ENSG00000221866	protein_coding
PM20D1	148811	ENSG00000162877	protein_coding
PMAIP1	5366	ENSG00000141682	protein_coding
PMEL	6490	ENSG00000185664	protein_coding
PMEPA1	56937	ENSG00000124225	protein_coding
PMP22	5376	ENSG00000109099	protein_coding
PNCK	139728	ENSG00000130822	protein_coding
PNLDC1	154197	ENSG00000146453	protein_coding
PNLIPRP3	119548	ENSG00000203837	protein_coding
PNMA2	10687	ENSG00000240694	protein_coding
PNMA3	29944	ENSG00000183837	protein_coding
PNMA5	114824	ENSG00000198883	protein_coding
PNMT	5409	ENSG00000141744	protein_coding
PNPLA5	150379	ENSG00000100341	protein_coding
PODNL1	79883	ENSG00000132000	protein_coding
POF1B	79983	ENSG00000124429	protein_coding
PON1	5444	ENSG00000005421	protein_coding
PON3	5446	ENSG00000105852	protein_coding
POSTN	10631	ENSG00000133110	protein_coding
POU2F3	25833	ENSG00000137709	protein_coding
POU3F3	5455	ENSG00000198914	protein_coding
POU4F1	5457	ENSG00000152192	protein_coding
PPBP	5473	ENSG00000163736	protein_coding
PPFIA4	8497	ENSG00000143847	protein_coding
PPP1R13L	10848	ENSG00000104881	protein_coding
PPP1R14C	81706	ENSG00000198729	protein_coding
PPP1R14D	54866	ENSG00000166143	protein_coding
PPP1R1A	5502	ENSG00000135447	protein_coding
PPP1R1B	84152	ENSG00000131771	protein_coding
PPP1R3A	5506	ENSG00000154415	protein_coding
PPP1R3G	648791	ENSG00000219607	protein_coding
PPP2R2C	5522	ENSG00000074211	protein_coding
PPP2R3A	5523	ENSG00000073711	protein_coding
PPY	5539	ENSG00000108849	protein_coding
PQLC1	80148	ENSG00000122490	protein_coding
PQLC2L	152078	ENSG00000174899	protein_coding
PRAC1	84366	ENSG00000159182	protein_coding
PRAME	23532	ENSG00000185686	protein_coding
PRAMEF11	440560	ENSG00000279195	protein_coding
PRAMEF17	391004	ENSG00000204479	protein_coding
PRAMEF4	400735	ENSG00000243073	protein_coding
PRAMEF7	441871	ENSG00000204510	protein_coding
PRAMEF8	391002	ENSG00000182330	protein_coding
PRAMEF9	343070	ENSG00000204501	protein_coding
PRAP1	118471	ENSG00000165828	protein_coding
PRDM8	56978	ENSG00000152784	protein_coding
PRH2	5555	ENSG00000134551	protein_coding
PRICKLE1	144165	ENSG00000139174	protein_coding
PRIMA1	145270	ENSG00000175785	protein_coding
PRKAR2B	5577	ENSG00000005249	protein_coding
PRKG2	5593	ENSG00000138669	protein_coding
PRL	5617	ENSG00000172179	protein_coding
PRLHR	2834	ENSG00000119973	protein_coding
PROC	5624	ENSG00000115718	protein_coding
PROCR	10544	ENSG00000101000	protein_coding
PRODH2	58510	ENSG00000250799	protein_coding
PROK1	84432	ENSG00000143125	protein_coding
PROM1	8842	ENSG00000007062	protein_coding
PROM2	150696	ENSG00000155066	protein_coding
PROZ	8858	ENSG00000126231	protein_coding
PRR15L	79170	ENSG00000167183	protein_coding
PRR18	285800	ENSG00000176381	protein_coding
PRR27	401137	ENSG00000187533	protein_coding
PRR35	146325	ENSG00000161992	protein_coding
PRR5L	79899	ENSG00000135362	protein_coding
[truncated: 837 more rows]
